# Supplementary material for: A smooth rearrangement of N-p-toluenesulfonyl 2-tert-butyldiphenylsilylmethyl-substituted azetidines into N-p-toluenesulfonyl 3-tert-butyldiphenylsilyl-substituted pyrrolidines
Source: Royal Society of Chemistry journal article supplement (doi:10.1039/c2ob07140a), 2012-01-01

## Supplementary Information

# A smooth rearrangement of *N-p*-toluenesulfonyl 2-*tert*-butyldiphenylsilylmethyl-substituted azetidines into *N-p*-toluenesulfonyl 3-*tert*-butyldiphenylsilyl-substituted pyrrolidines

Bharat D. Narhe,<sup>a</sup> Vardhineedi Sriramurthy,<sup>b</sup> Veejendra K. Yadav<sup>a\*</sup>

<sup>a</sup>Department of Chemistry, Indian Institute of Technology, Kanpur 208 016, India.

<sup>b</sup>Current address: Chemical Development, TCI America, 9211 N. Harborgate Street, Portland, OR 97203, USA

---

|       |                                                                                                                                                  |
|-------|--------------------------------------------------------------------------------------------------------------------------------------------------|
| S1-S3 | Table of contents                                                                                                                                |
| S4    | <sup>1</sup> H and <sup>13</sup> C NMR spectra of ( <i>S</i> )- <i>p</i> -toluenesulfonylimine of 2- <i>tert</i> -butyldiphenylsilylacetaldehyde |
| S5    | <sup>1</sup> H and <sup>13</sup> C NMR spectra of <b>5</b> (R = H)                                                                               |
| S6    | <sup>1</sup> H and <sup>13</sup> C NMR spectra of <b>5a</b> (R = Me)                                                                             |
| S7    | <sup>1</sup> H and <sup>13</sup> C NMR spectra of <b>5b</b> (R = Me)                                                                             |
| S8    | <sup>1</sup> H and <sup>13</sup> C NMR spectra of <b>5a</b> (R = allyl)                                                                          |
| S9    | <sup>1</sup> H and <sup>13</sup> C NMR spectra of <b>5b</b> (R = allyl)                                                                          |
| S10   | <sup>1</sup> H and <sup>13</sup> C NMR spectra of <b>5a</b> (R = benzyl)                                                                         |
| S11   | <sup>1</sup> H and <sup>13</sup> C NMR spectra of <b>5b</b> (R = benzyl)                                                                         |
| S12   | <sup>1</sup> H and <sup>13</sup> C NMR spectra of <b>5a</b> (R = vinyl)                                                                          |
| S13   | <sup>1</sup> H and <sup>13</sup> C NMR spectra of <b>5b</b> (R = vinyl)                                                                          |
| S14   | <sup>1</sup> H and <sup>13</sup> C NMR spectra of <b>5a</b> (R = phenyl)                                                                         |
| S15   | <sup>1</sup> H and <sup>13</sup> C NMR spectra of <b>5b</b> (R = phenyl)                                                                         |
| S16   | <sup>1</sup> H and <sup>13</sup> C NMR spectra of <b>5a</b> (R = <i>p</i> -fluorophenyl)                                                         |
| S17   | <sup>1</sup> H and <sup>13</sup> C NMR spectra of <b>5b</b> (R = <i>p</i> -fluorophenyl)                                                         |
| S18   | <sup>1</sup> H and <sup>13</sup> C NMR spectra of <b>7</b> (R = H)                                                                               |
| S19   | <sup>1</sup> H and <sup>13</sup> C NMR spectra of <b>7a</b> (R = Me)                                                                             |
| S20   | <sup>1</sup> H and <sup>13</sup> C NMR spectra of <b>7b</b> (R = Me)                                                                             |
| S21   | <sup>1</sup> H and <sup>13</sup> C NMR spectra of <b>7a</b> (R = allyl)                                                                          |
| S22   | <sup>1</sup> H and <sup>13</sup> C NMR spectra of <b>7b</b> (R = allyl)                                                                          |
| S23   | <sup>1</sup> H and <sup>13</sup> C NMR spectra of <b>7a</b> (R = benzyl)                                                                         |
| S24   | <sup>1</sup> H and <sup>13</sup> C NMR spectra of <b>7b</b> (R = benzyl)                                                                         |
| S25   | <sup>1</sup> H and <sup>13</sup> C NMR spectra of <b>7a</b> (R = vinyl)                                                                          |
| S26   | <sup>1</sup> H and <sup>13</sup> C NMR spectra of <b>7b</b> (R = vinyl)                                                                          |
| S27   | <sup>1</sup> H and <sup>13</sup> C NMR spectra of <b>7a</b> (R = phenyl)                                                                         |

|     |                                                                                                                                             |
|-----|---------------------------------------------------------------------------------------------------------------------------------------------|
| S28 | <sup>1</sup> H and <sup>13</sup> C NMR spectra of <b>7b</b> (R = phenyl)                                                                    |
| S29 | <sup>1</sup> H and <sup>13</sup> C NMR spectra of <b>7a</b> (R = <i>p</i> -fluorophenyl)                                                    |
| S30 | <sup>1</sup> H and <sup>13</sup> C NMR spectra of <b>7b</b> (R = <i>p</i> -fluorophenyl)                                                    |
| S31 | <sup>1</sup> H and <sup>13</sup> C NMR spectra of <i>N-p</i> -Toluenesulfonyl-2( <i>R</i> )- <i>tert</i> -butyldiphenylsilylmethylazetidine |
| S32 | <sup>1</sup> H and <sup>13</sup> C NMR spectra of <b>1b<sub>1</sub></b>                                                                     |
| S33 | <sup>1</sup> H and <sup>13</sup> C NMR spectra of <b>1b<sub>2</sub></b>                                                                     |
| S34 | <sup>1</sup> H and <sup>13</sup> C NMR spectra of <b>1f<sub>1</sub></b>                                                                     |
| S35 | <sup>1</sup> H and <sup>13</sup> C NMR spectra of <b>1f<sub>2</sub></b>                                                                     |
| S36 | <sup>1</sup> H and <sup>13</sup> C NMR spectra of <b>1c<sub>1</sub></b>                                                                     |
| S37 | <sup>1</sup> H and <sup>13</sup> C NMR spectra of <b>1c<sub>2</sub></b>                                                                     |
| S38 | <sup>1</sup> H and <sup>13</sup> C NMR spectra of <b>1g<sub>1</sub></b>                                                                     |
| S39 | <sup>1</sup> H and <sup>13</sup> C NMR spectra of <b>1g<sub>2</sub></b>                                                                     |
| S40 | <sup>1</sup> H and <sup>13</sup> C NMR spectra of <b>1d<sub>1</sub></b>                                                                     |
| S41 | <sup>1</sup> H and <sup>13</sup> C NMR spectra of <b>1d<sub>2</sub></b>                                                                     |
| S42 | <sup>1</sup> H and <sup>13</sup> C NMR spectra of <b>1e<sub>1</sub></b>                                                                     |
| S43 | <sup>1</sup> H and <sup>13</sup> C NMR spectra of <b>1e<sub>2</sub></b>                                                                     |
| S44 | <sup>1</sup> H and <sup>13</sup> C NMR spectra of (±)- <b>3a</b>                                                                            |
| S45 | <sup>1</sup> H and <sup>13</sup> C NMR spectra of <b>3b<sub>1</sub></b>                                                                     |
| S46 | <sup>1</sup> H and <sup>13</sup> C NMR spectra of <b>3b<sub>2</sub></b>                                                                     |
| S47 | <sup>1</sup> H and <sup>13</sup> C NMR spectra of ( <i>E</i> )- <b>13</b>                                                                   |
| S48 | <sup>1</sup> H and <sup>13</sup> C NMR spectra of <b>3f<sub>1</sub></b>                                                                     |
| S49 | <sup>1</sup> H and <sup>13</sup> C NMR spectra of <b>3f<sub>2</sub></b>                                                                     |
| S50 | <sup>1</sup> H and <sup>13</sup> C NMR spectra of ( <i>E/Z</i> )- <b>16</b>                                                                 |
| S51 | <sup>1</sup> H and <sup>13</sup> C NMR spectra of <b>3c<sub>1</sub></b>                                                                     |
| S52 | <sup>1</sup> H and <sup>13</sup> C NMR spectra of <b>3c<sub>2</sub></b>                                                                     |
| S53 | <sup>1</sup> H and <sup>13</sup> C NMR spectra of ( <i>E/Z</i> )- <b>14</b>                                                                 |
| S54 | <sup>1</sup> H and <sup>13</sup> C NMR spectra of <b>3g<sub>1a</sub></b>                                                                    |
| S55 | <sup>1</sup> H and <sup>13</sup> C NMR spectra of (±)- <b>3g</b>                                                                            |
| S56 | <sup>1</sup> H and <sup>13</sup> C NMR spectra of <b>3g<sub>2a</sub></b>                                                                    |
| S57 | <sup>1</sup> H and <sup>13</sup> C NMR spectra of <b>3d<sub>1</sub></b>                                                                     |
| S58 | <sup>1</sup> H and <sup>13</sup> C NMR spectra of ( <i>E</i> )- <b>15d</b>                                                                  |
| S59 | <sup>1</sup> H and <sup>13</sup> C NMR spectra of <b>3d<sub>2</sub></b>                                                                     |
| S60 | <sup>1</sup> H and <sup>13</sup> C NMR spectra of <b>3e<sub>1</sub></b>                                                                     |

|     |                                                                           |
|-----|---------------------------------------------------------------------------|
| S61 | $^1\text{H}$ and $^{13}\text{C}$ NMR spectra of ( <i>E</i> )- <b>15e</b>  |
| S62 | $^1\text{H}$ and $^{13}\text{C}$ NMR spectra of <b>3e<sub>2</sub></b>     |
| S63 | $^1\text{H}$ and $^{13}\text{C}$ NMR spectra of ( $\pm$ )- <b>19a</b>     |
| S64 | $^1\text{H}$ and $^{13}\text{C}$ NMR spectra of <b>20b<sub>2</sub></b>    |
| S65 | $^1\text{H}$ and $^{13}\text{C}$ NMR spectra of <b>10</b>                 |
| S66 | $^1\text{H}$ and $^{13}\text{C}$ NMR spectra of <b>12</b> ( $\alpha$ -OH) |
| S67 | $^1\text{H}$ and $^{13}\text{C}$ NMR spectra of <b>12</b> ( $\beta$ -OH)  |
| S68 | $^1\text{H}$ and $^{13}\text{C}$ NMR spectra of <b>1h<sub>1</sub></b>     |
| S69 | $^1\text{H}$ and $^{13}\text{C}$ NMR spectra of <b>1h<sub>2</sub></b>     |
| S70 | $^1\text{H}$ and $^{13}\text{C}$ NMR spectra of <b>3h<sub>1</sub></b>     |
| S71 | $^1\text{H}$ and $^{13}\text{C}$ NMR spectra of <b>17</b>                 |
| S72 | $^1\text{H}$ and $^{13}\text{C}$ NMR spectra of <b>3h<sub>2</sub></b>     |
| S73 | $^1\text{H}$ and $^{13}\text{C}$ NMR spectra of <b>18</b>                 |
| S74 | $^1\text{H}$ and $^{13}\text{C}$ NMR spectra of <b>21h<sub>1</sub></b>    |
| S75 | $^1\text{H}$ and $^{13}\text{C}$ NMR spectra of <b>21h<sub>2</sub></b>    |

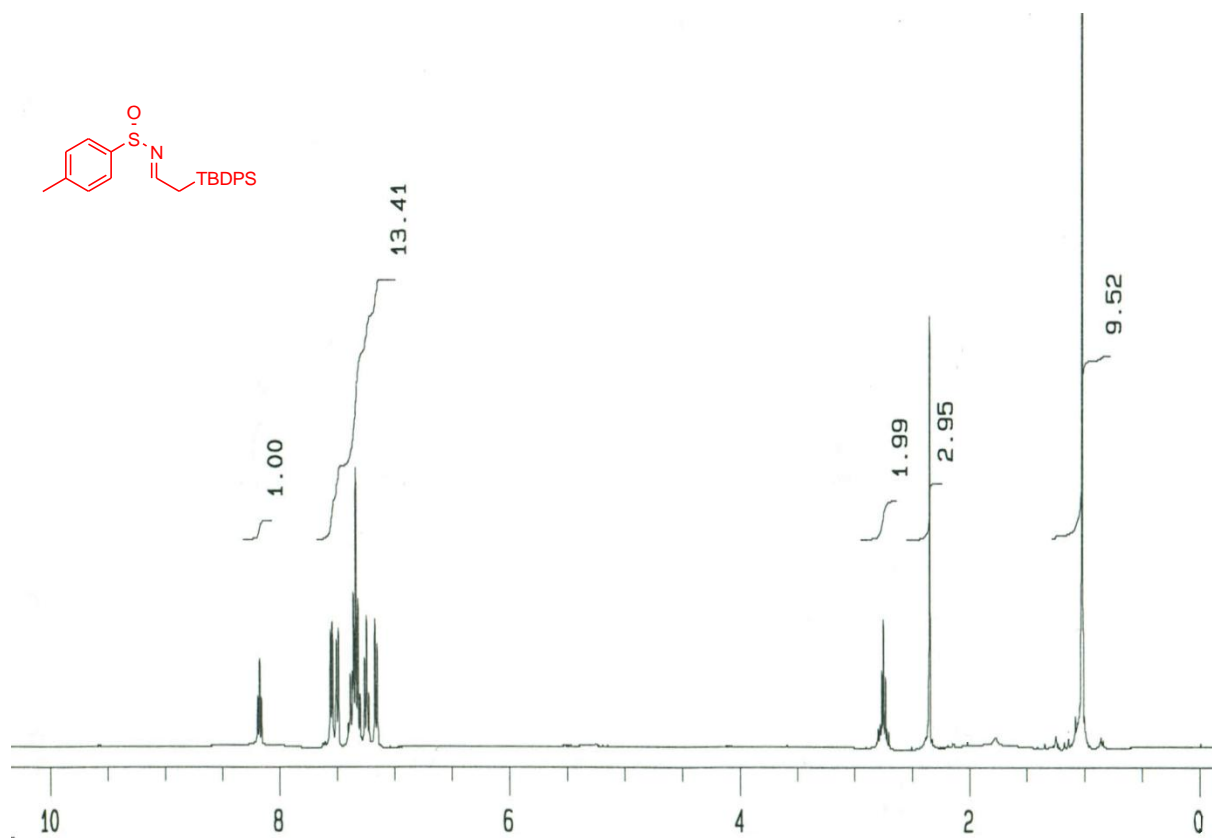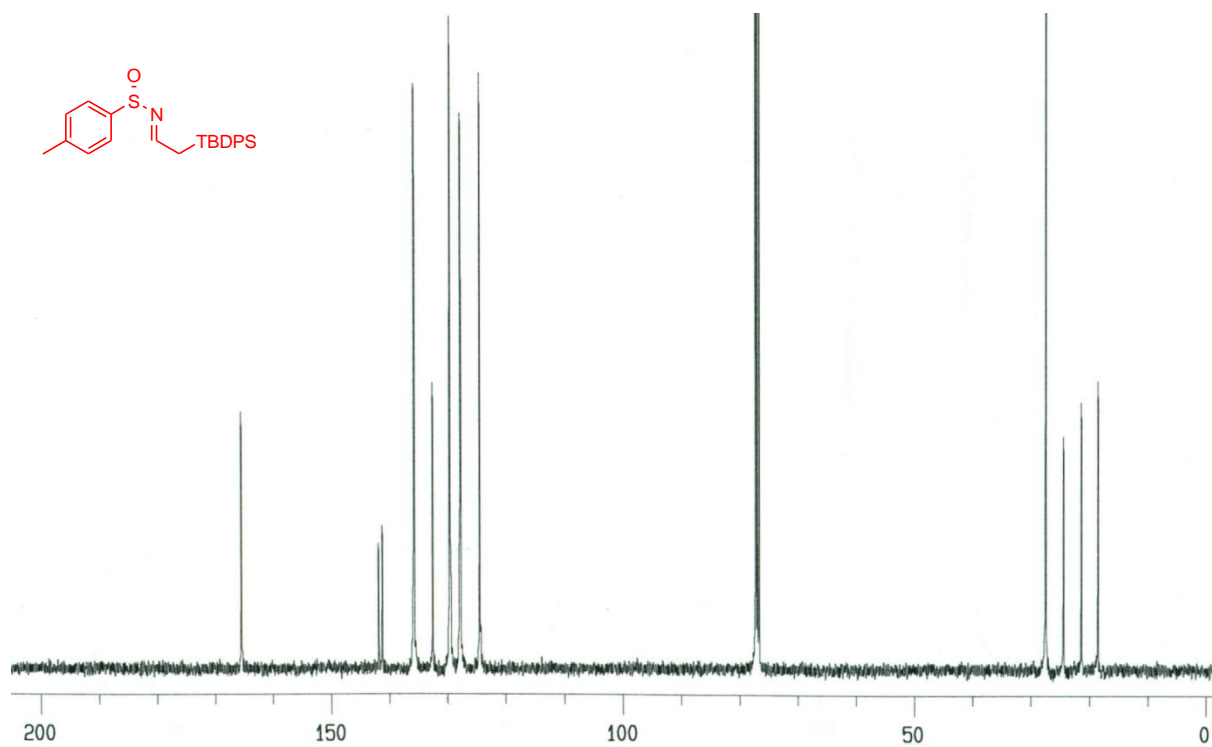



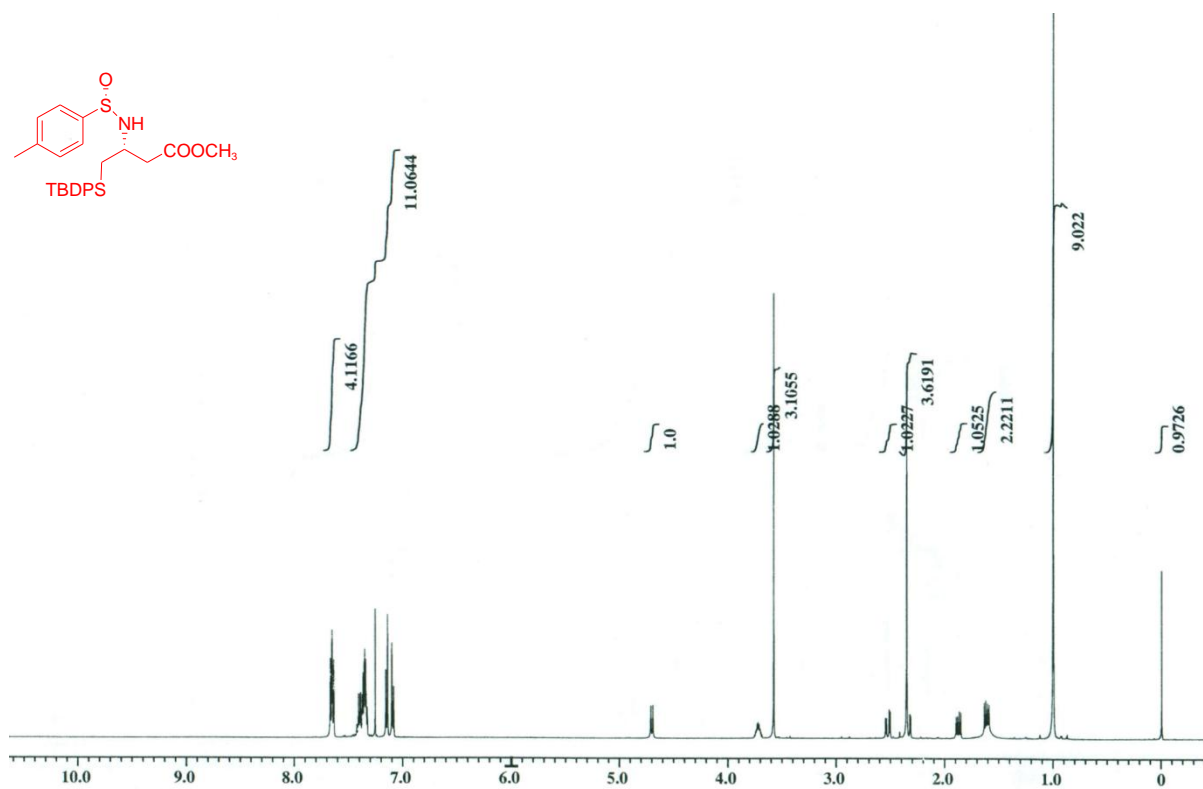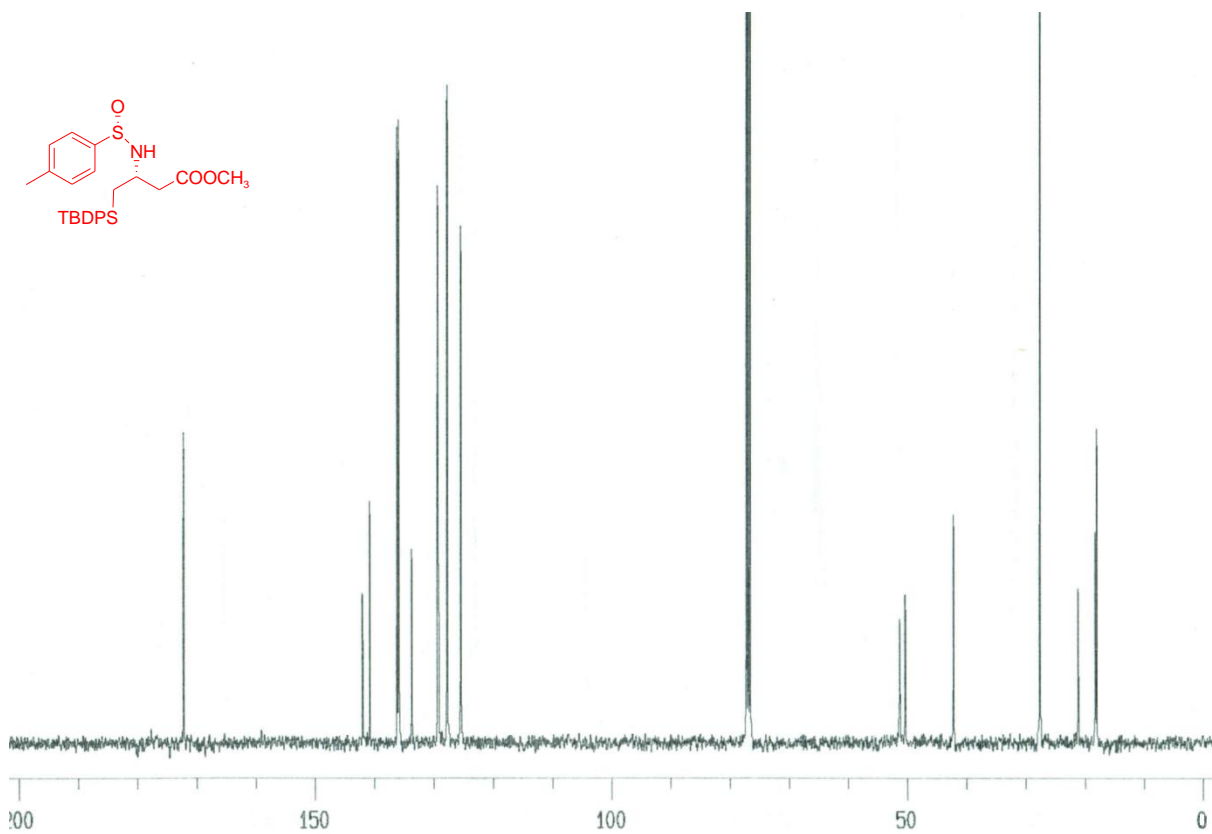

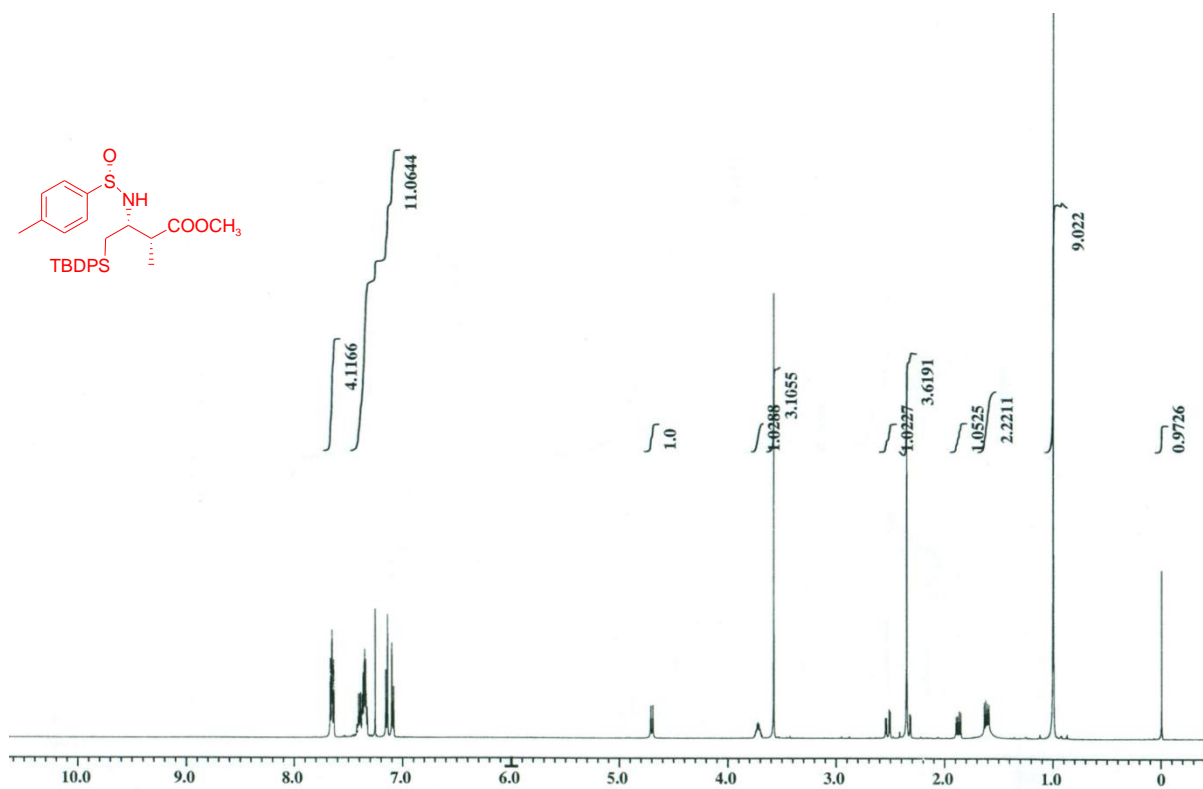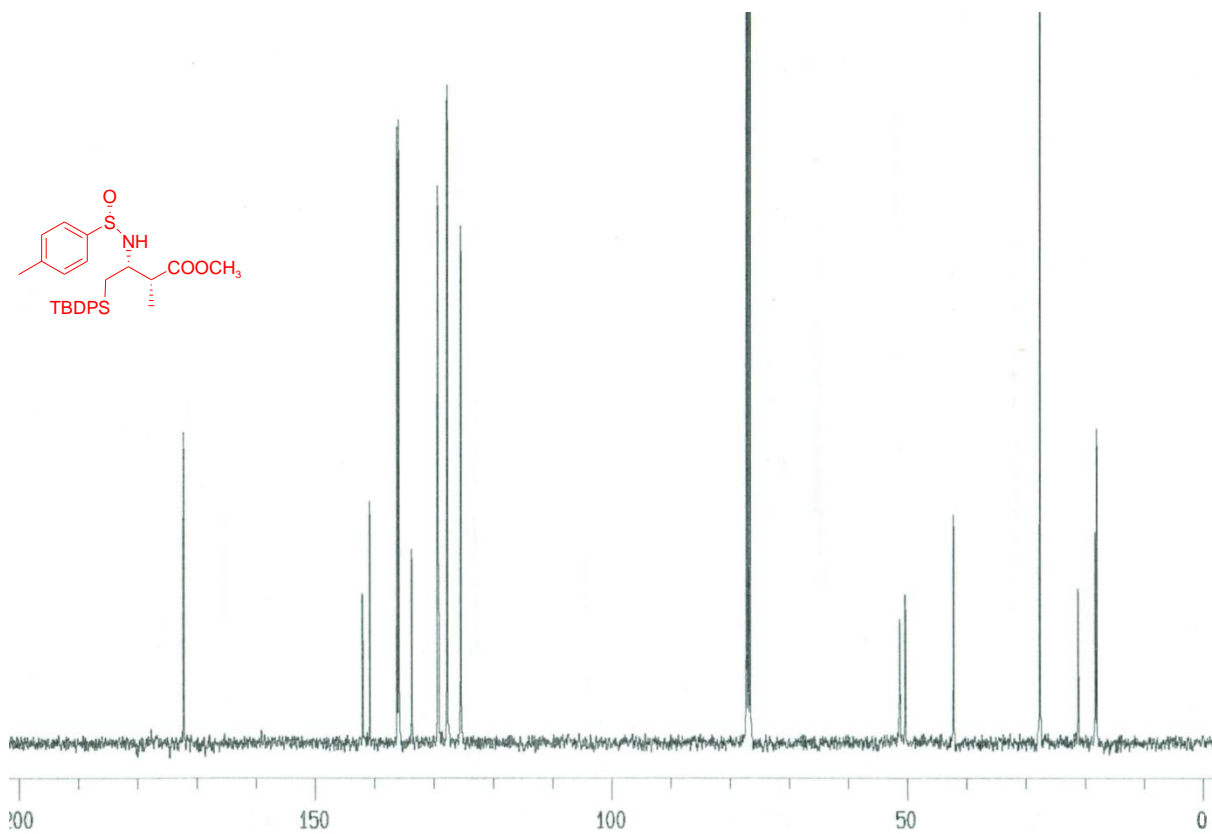

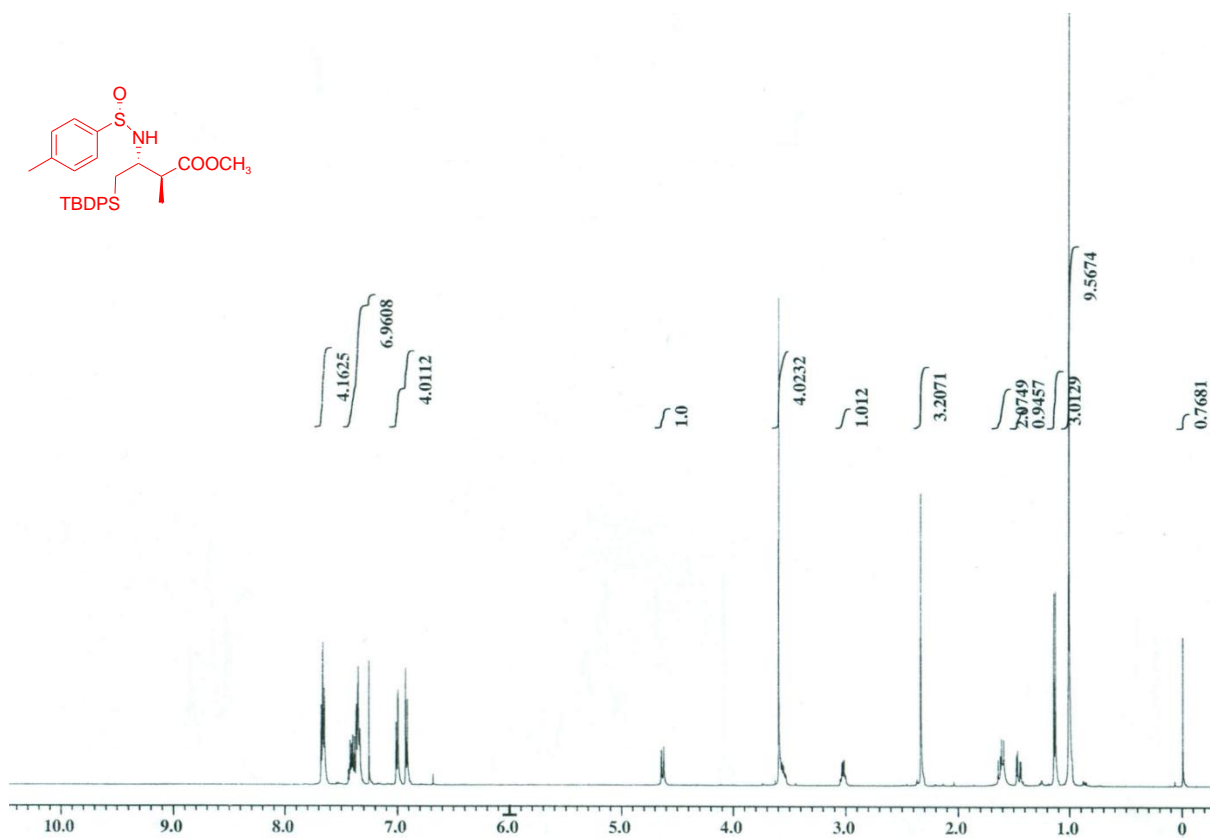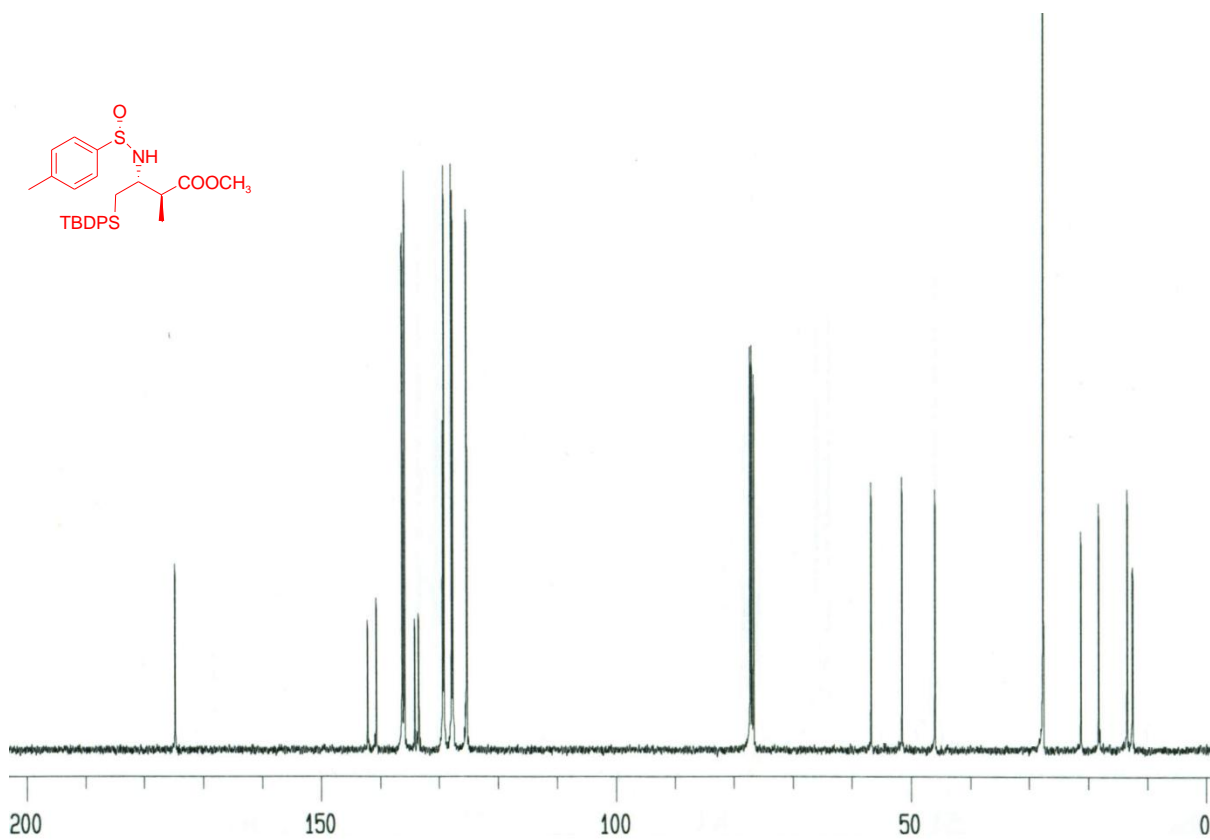

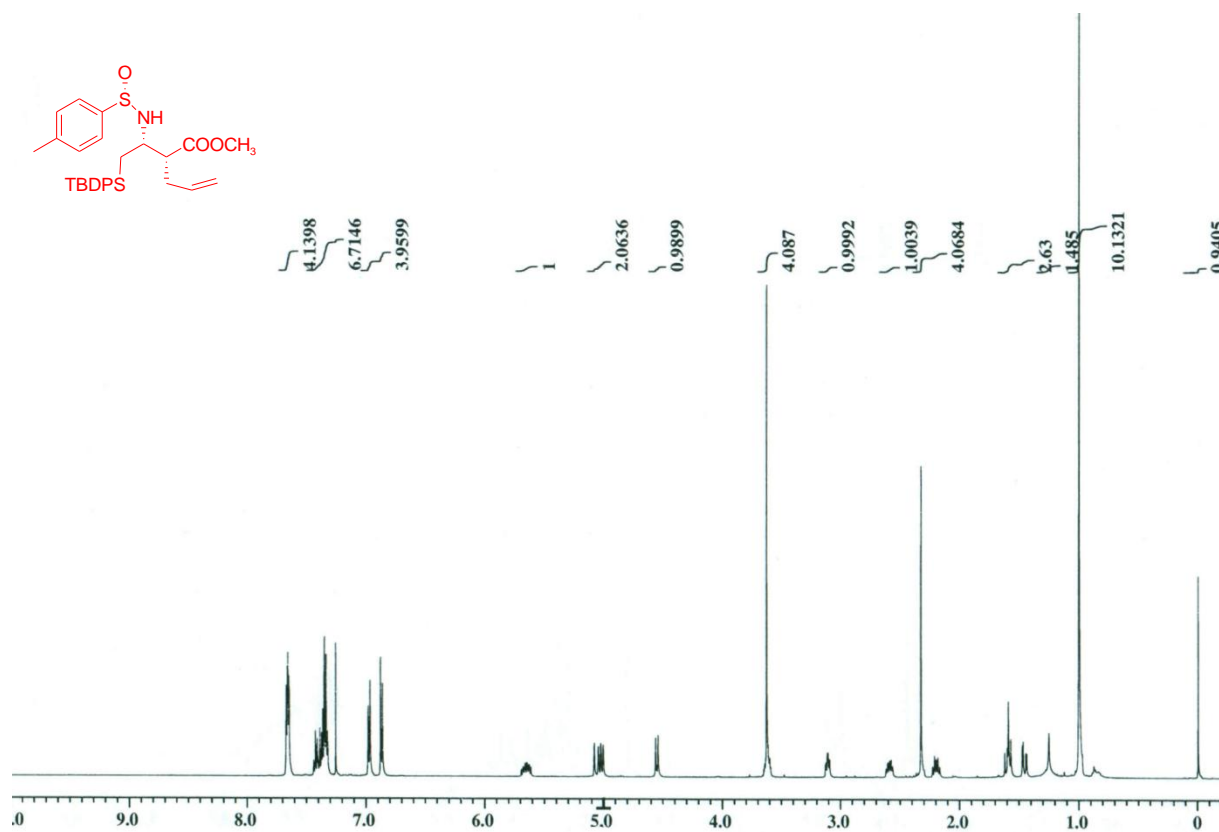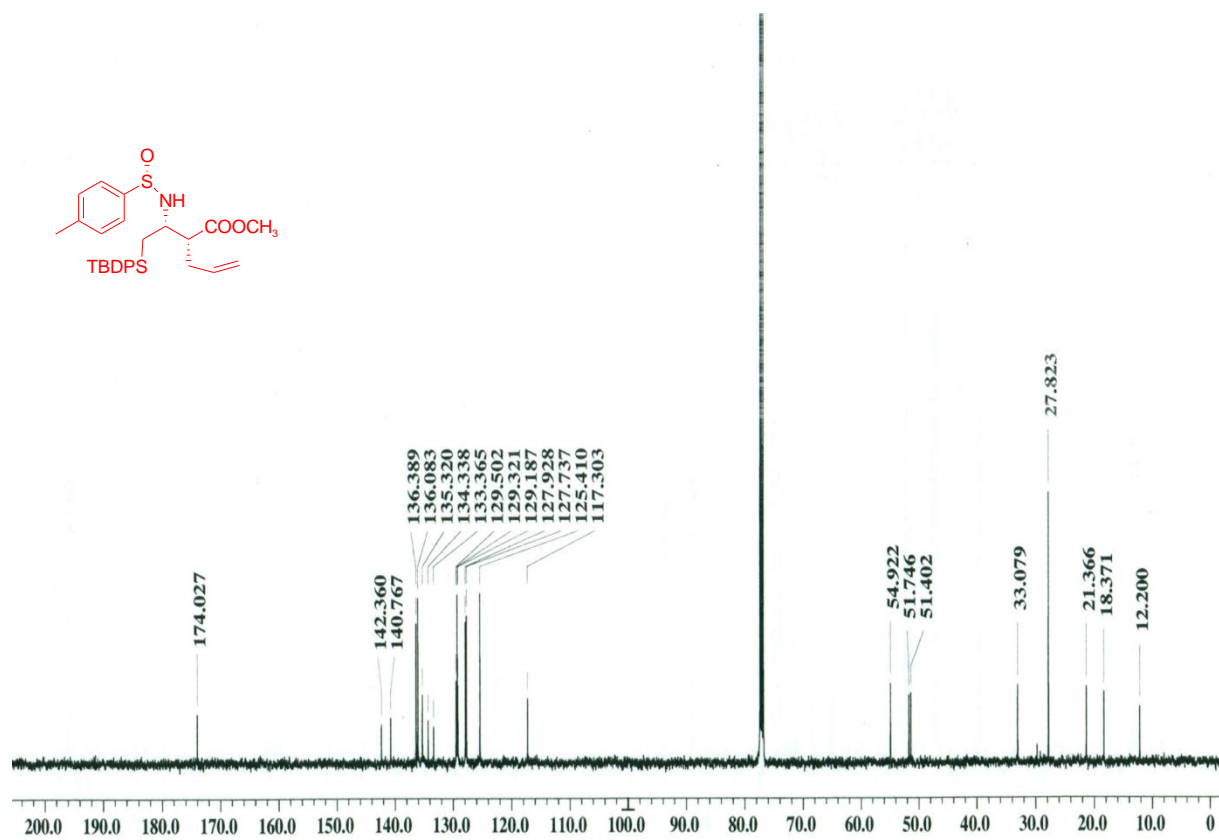

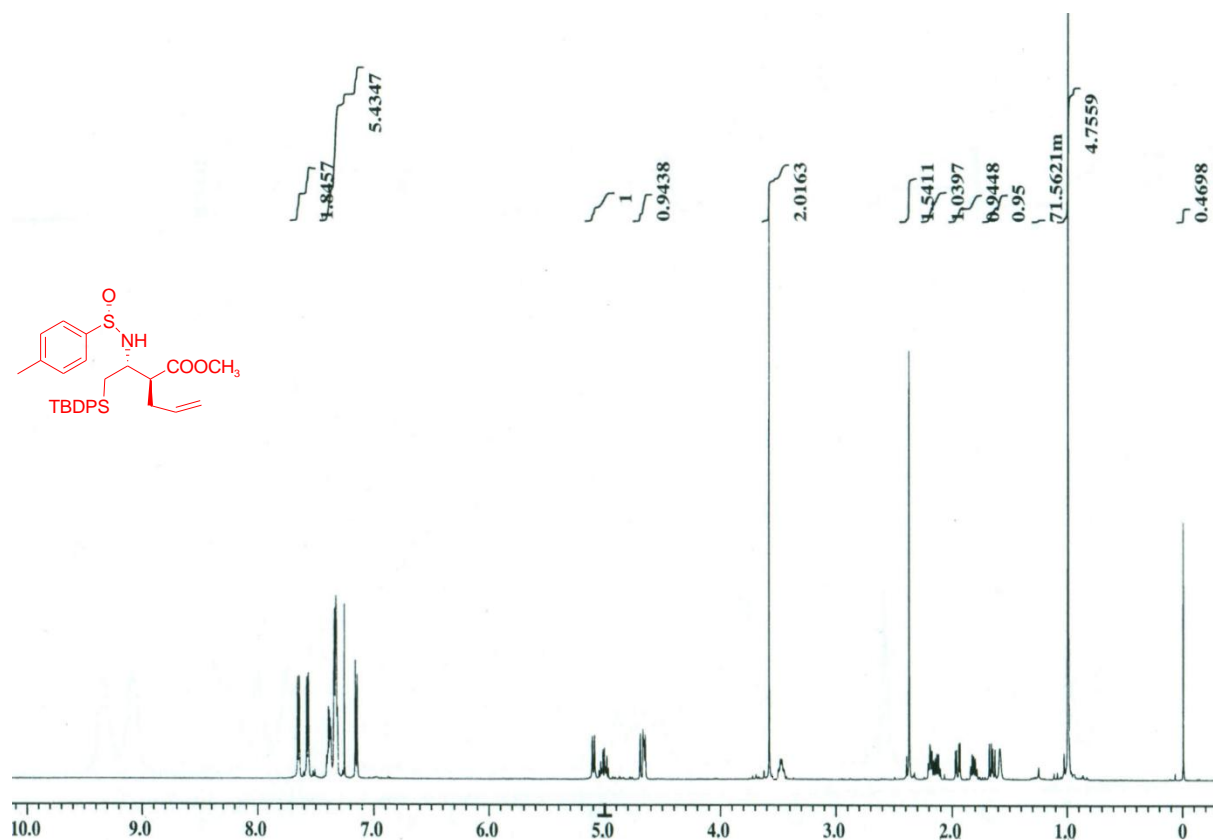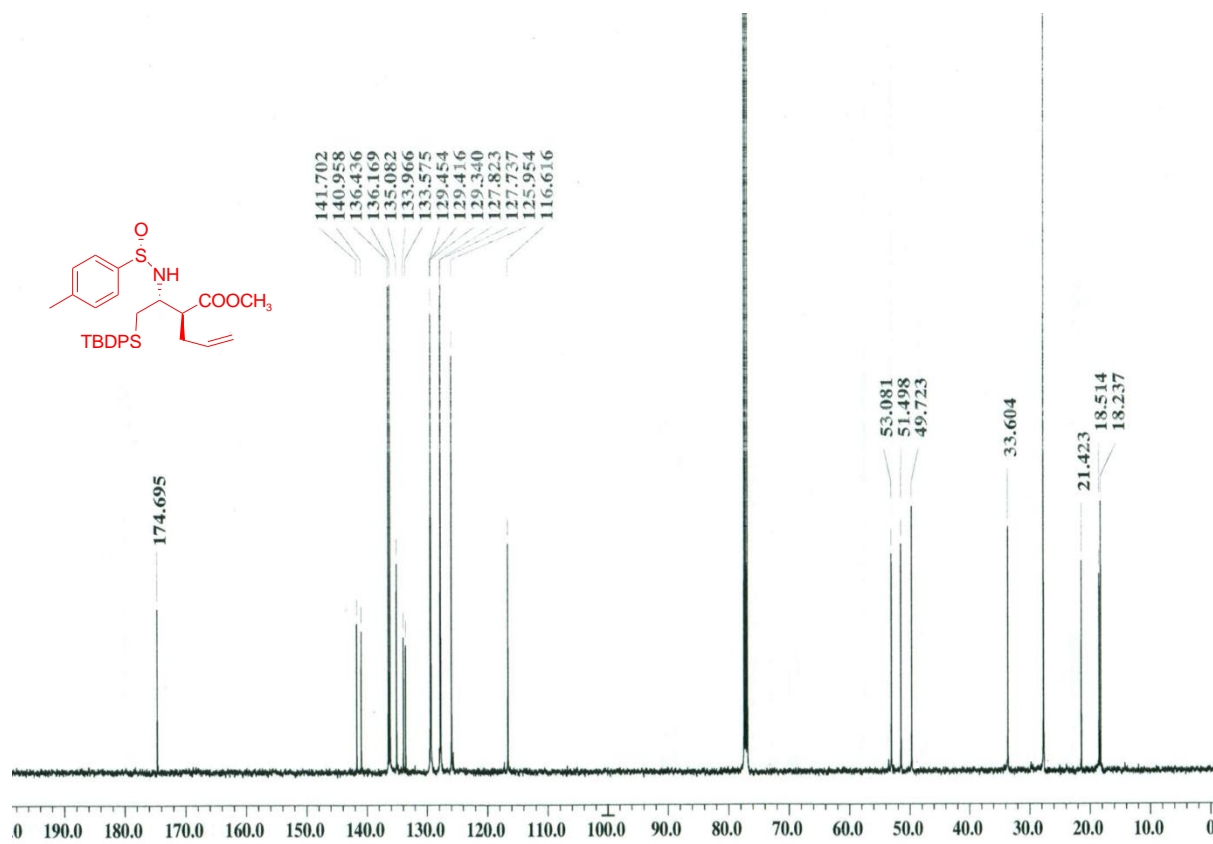

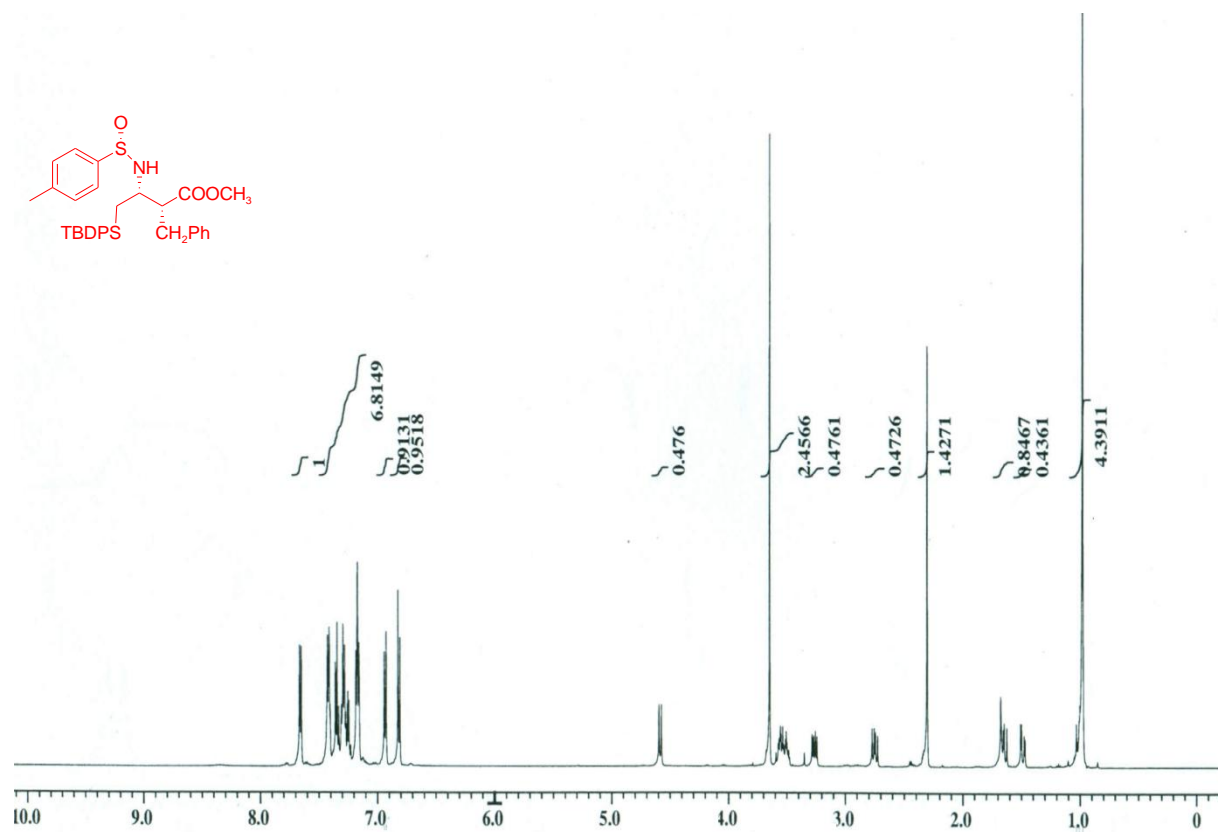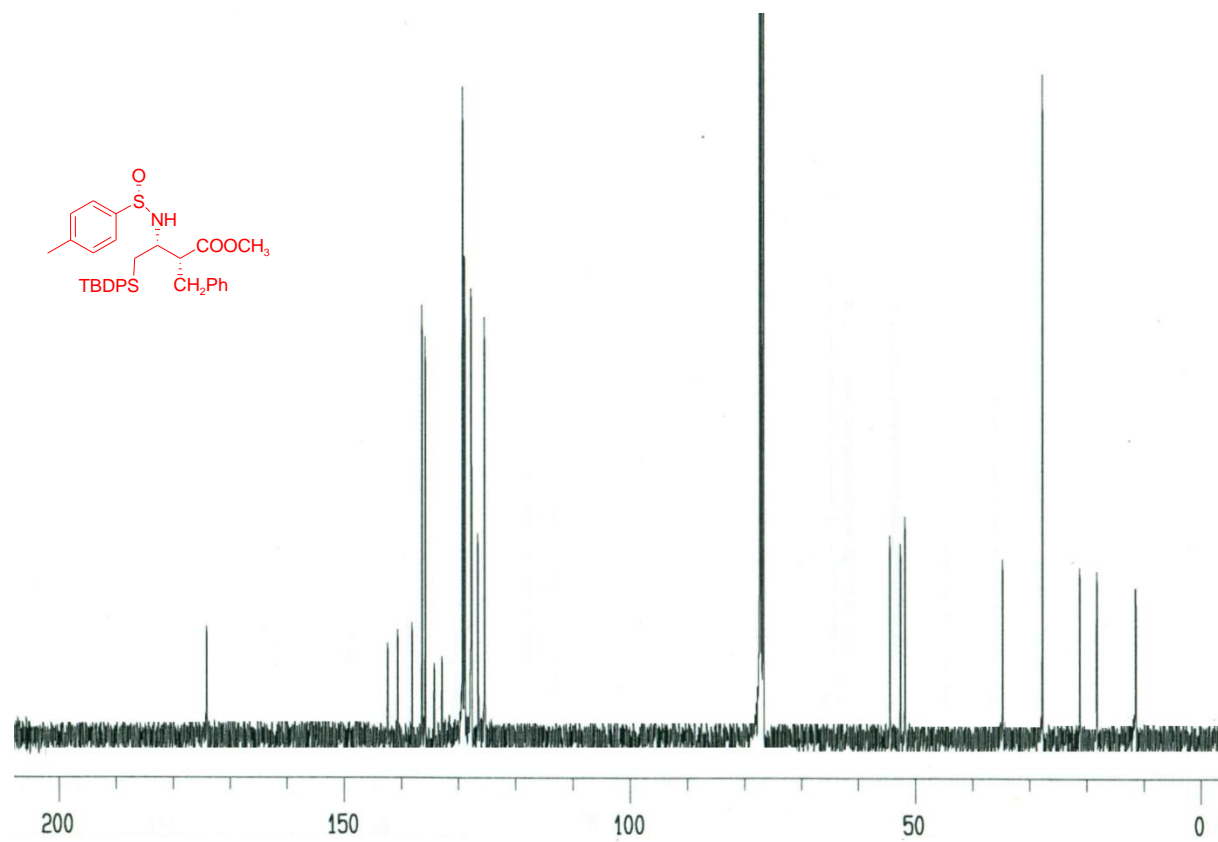

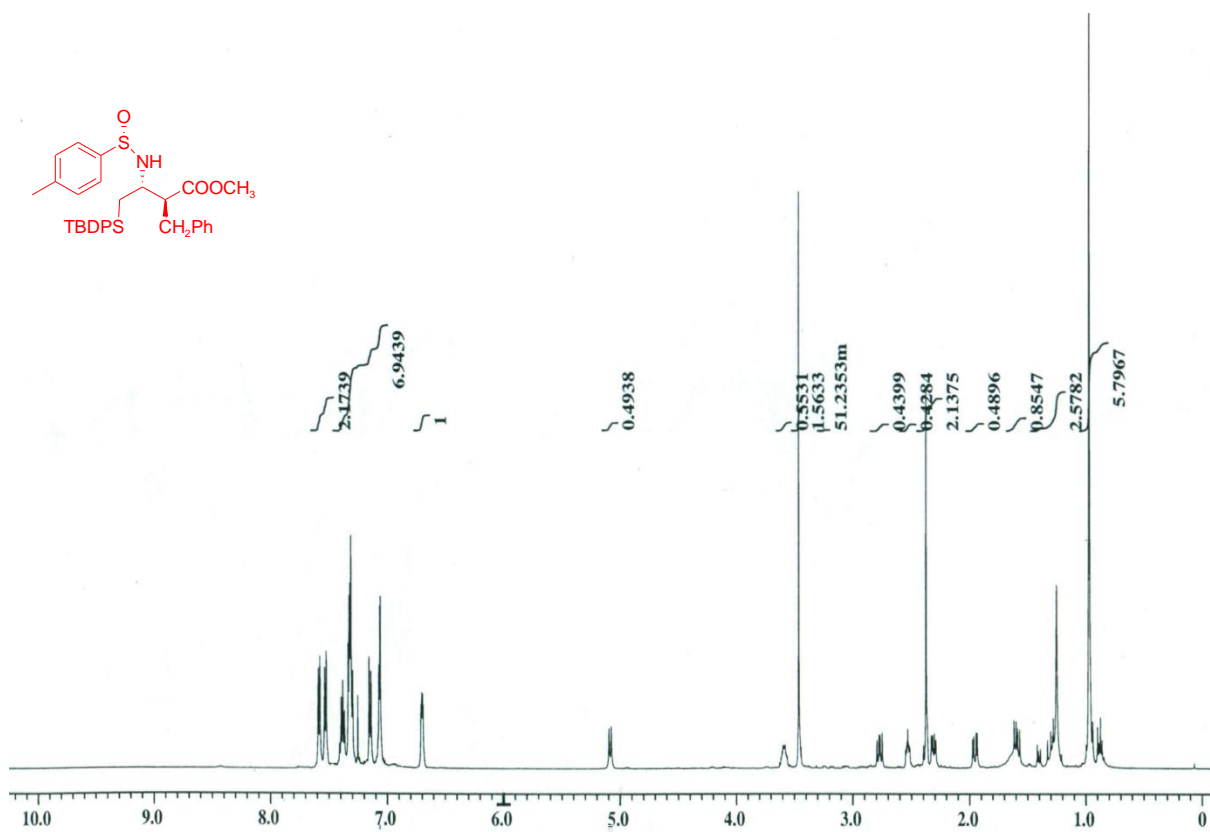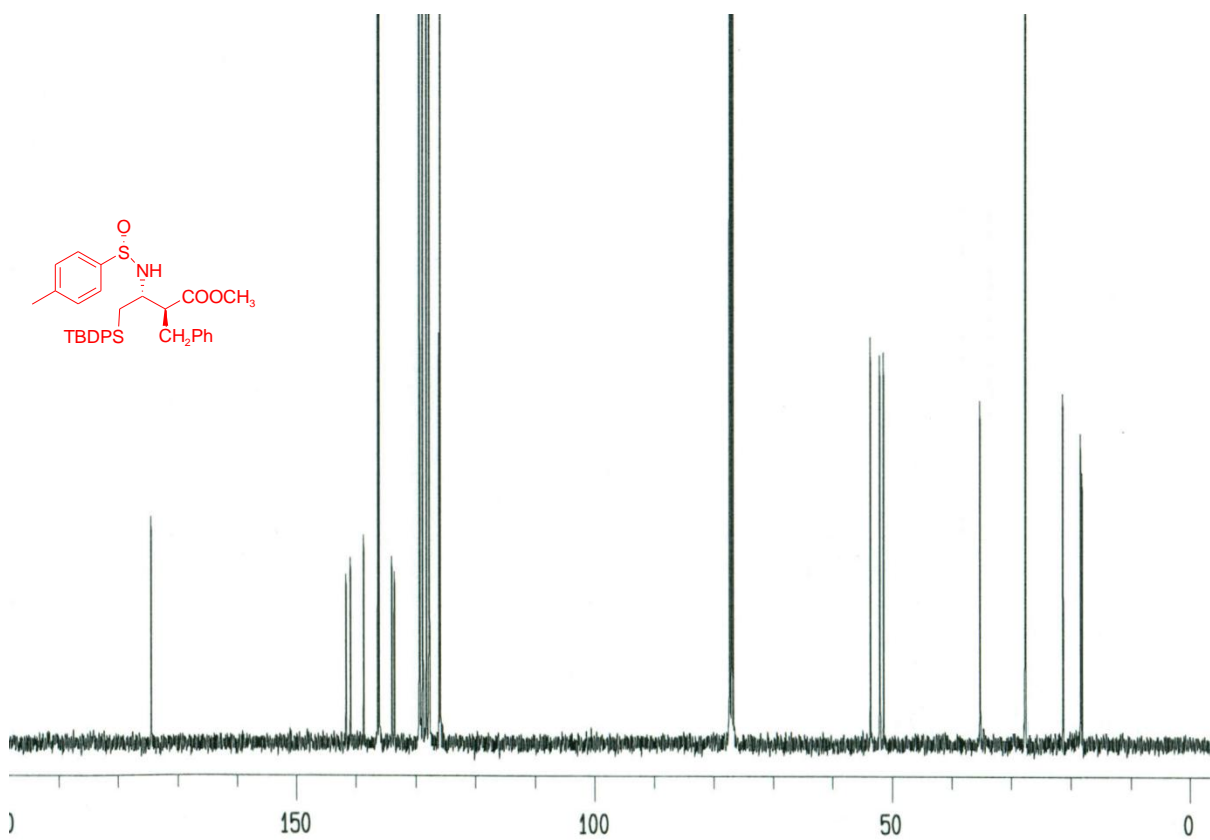

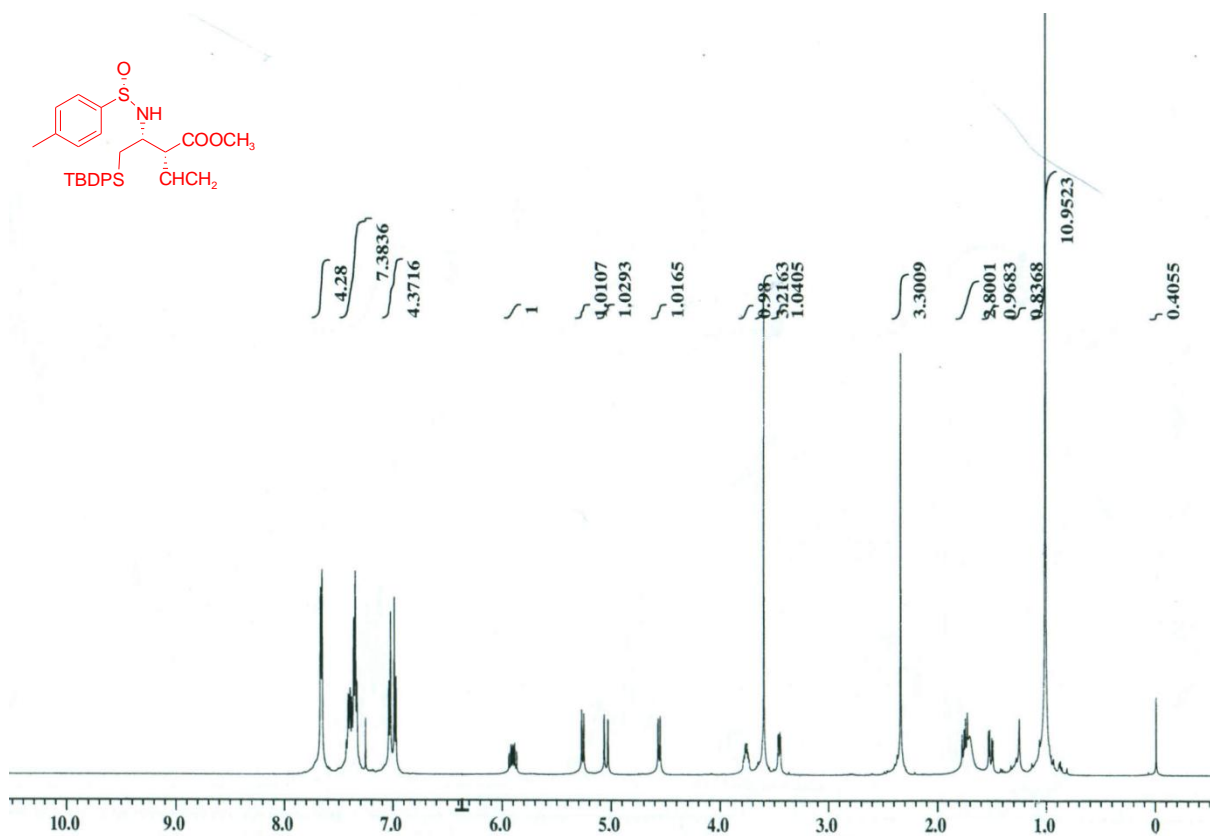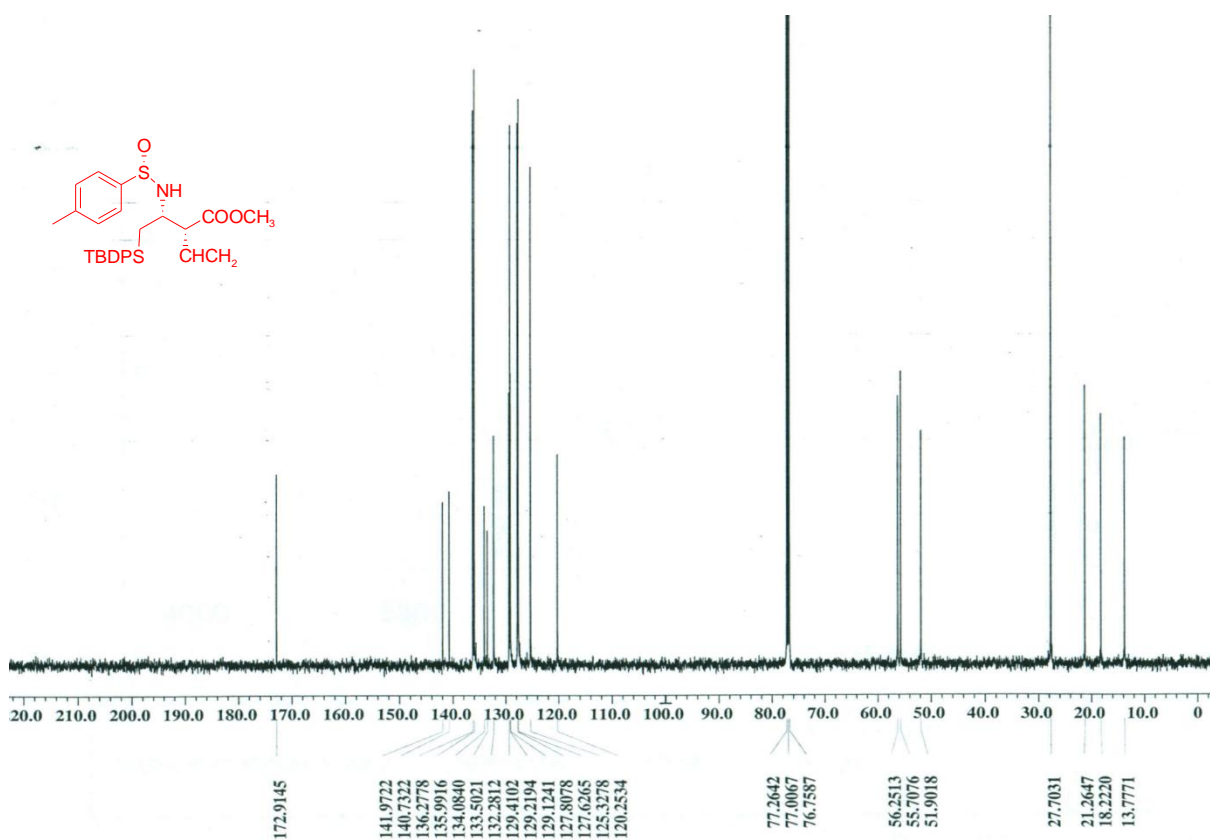



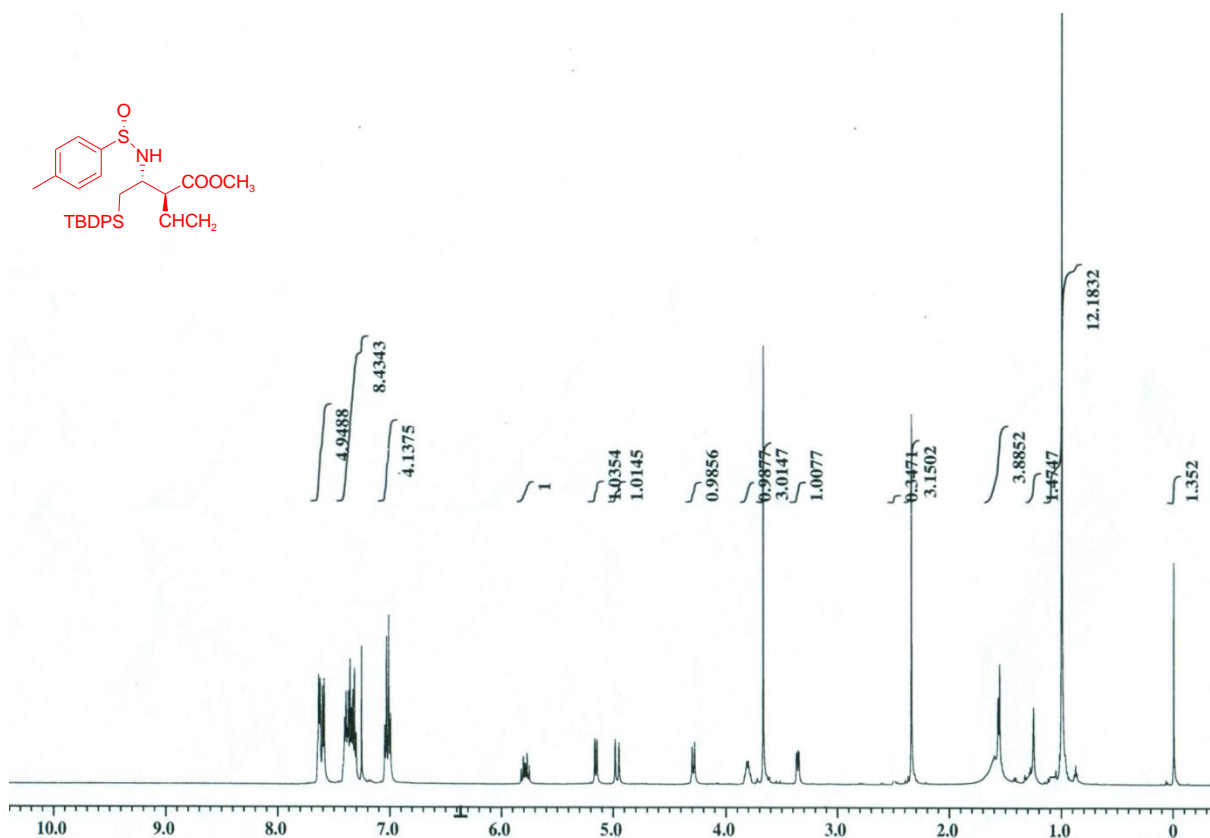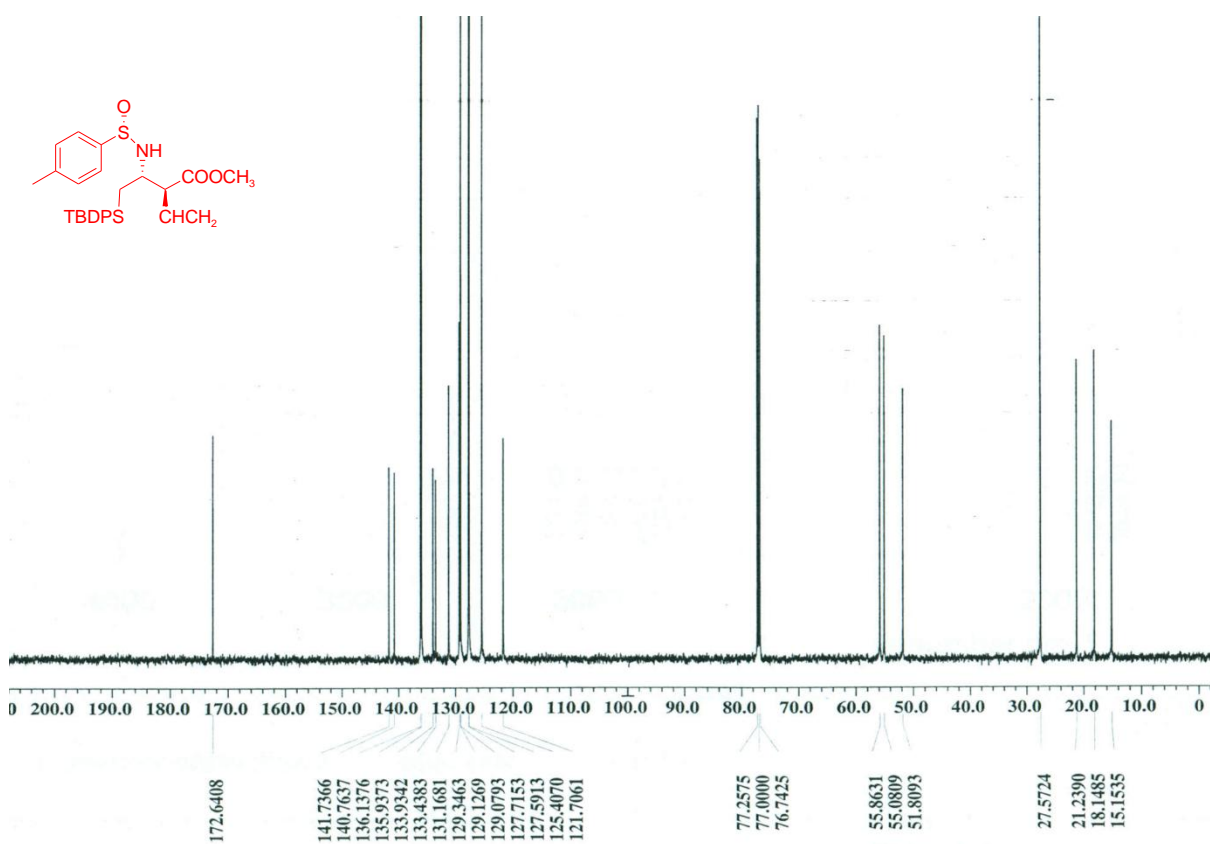

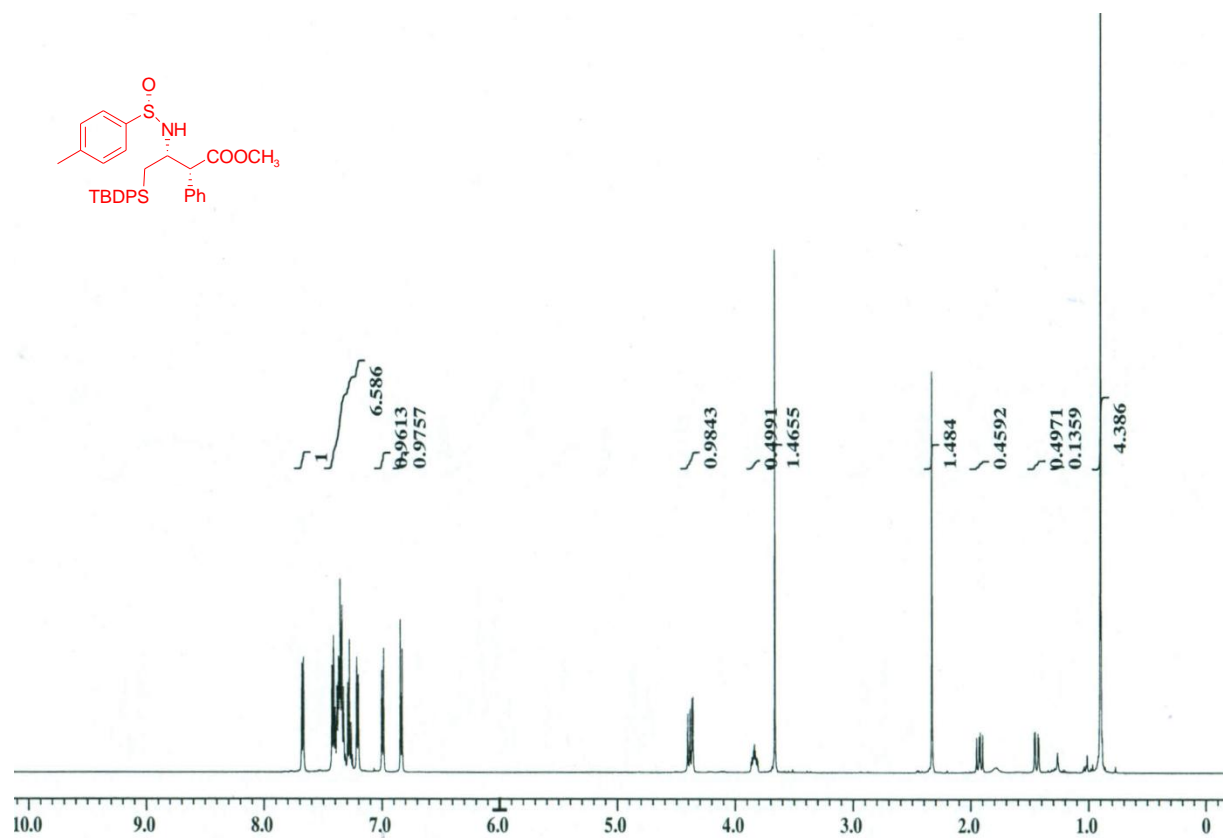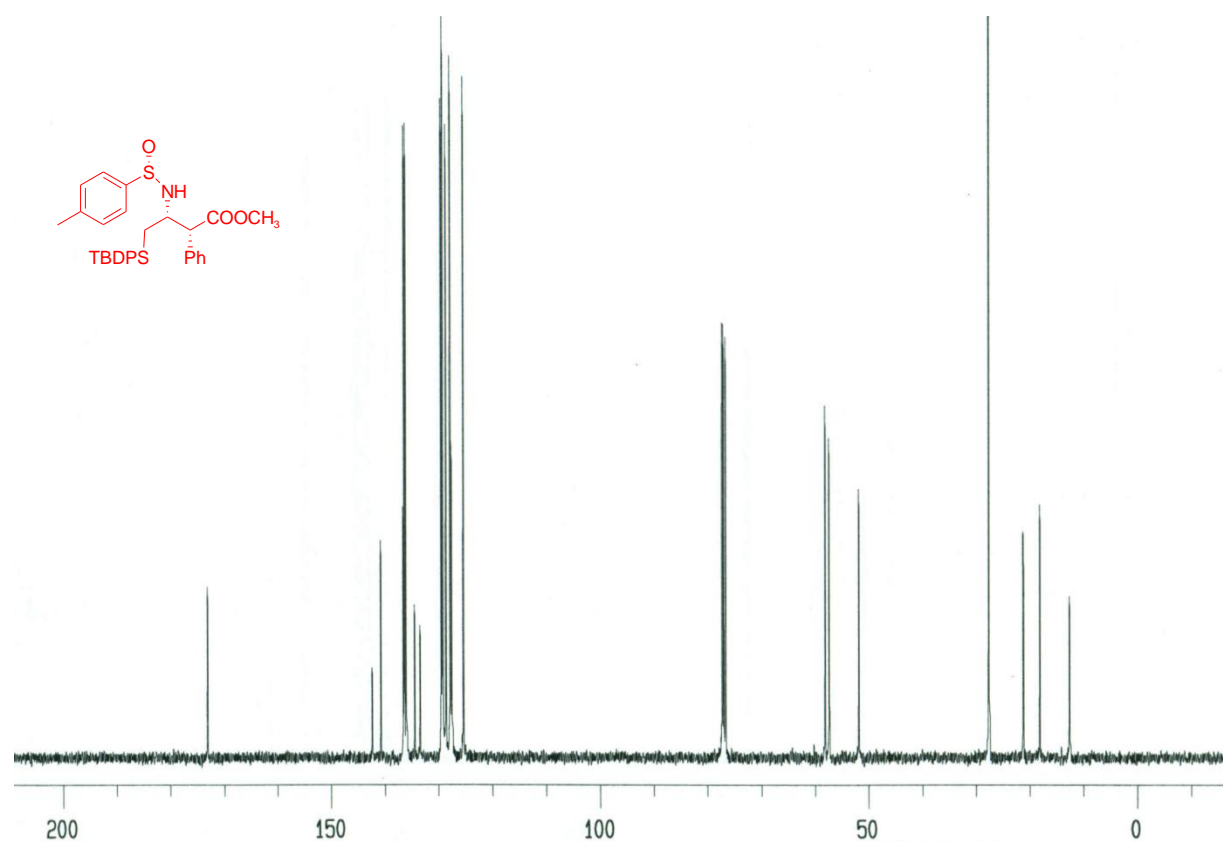

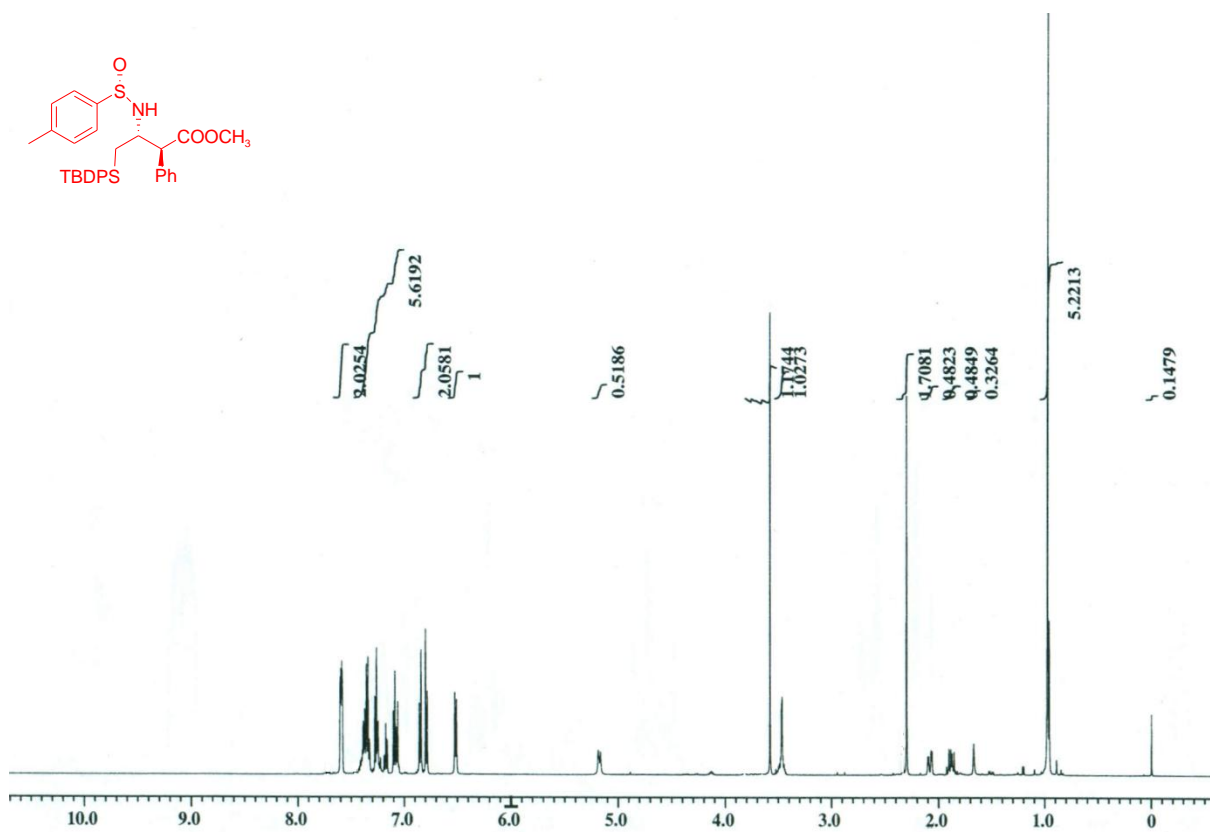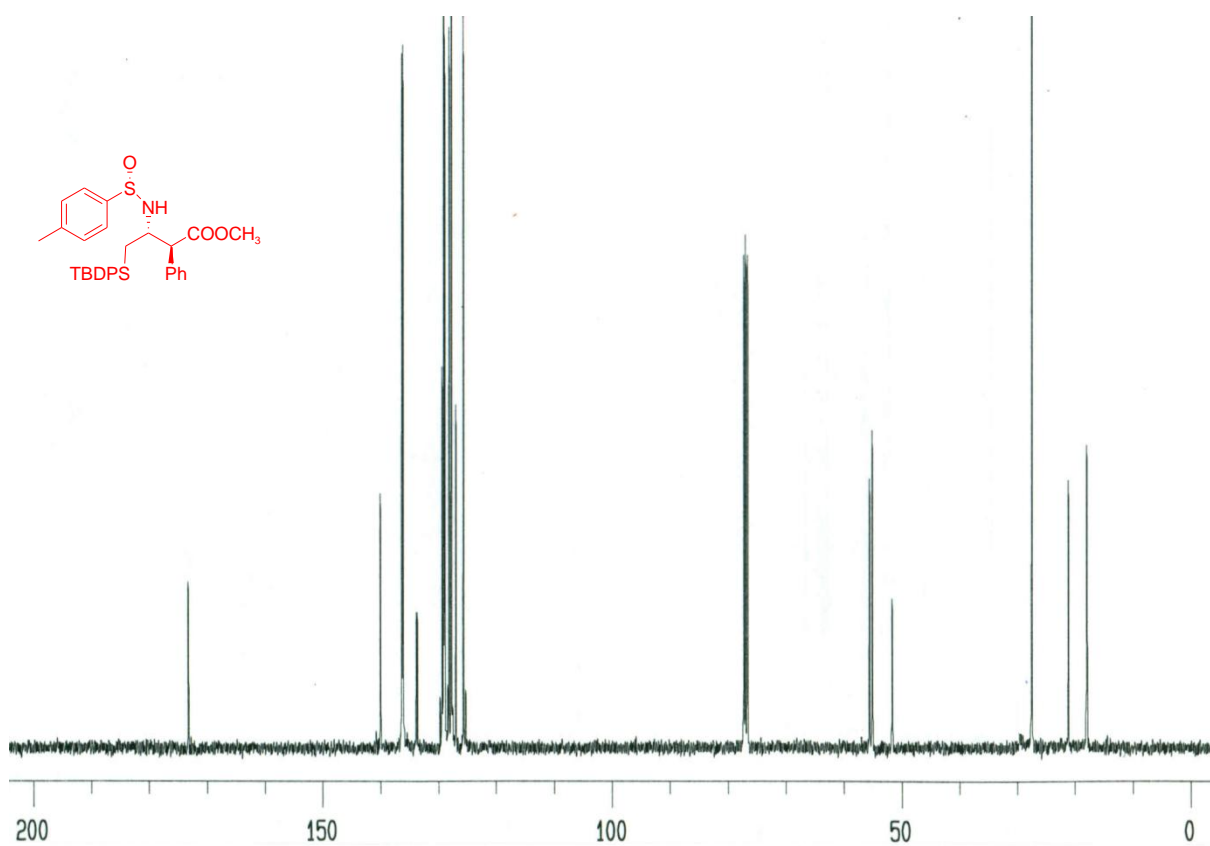

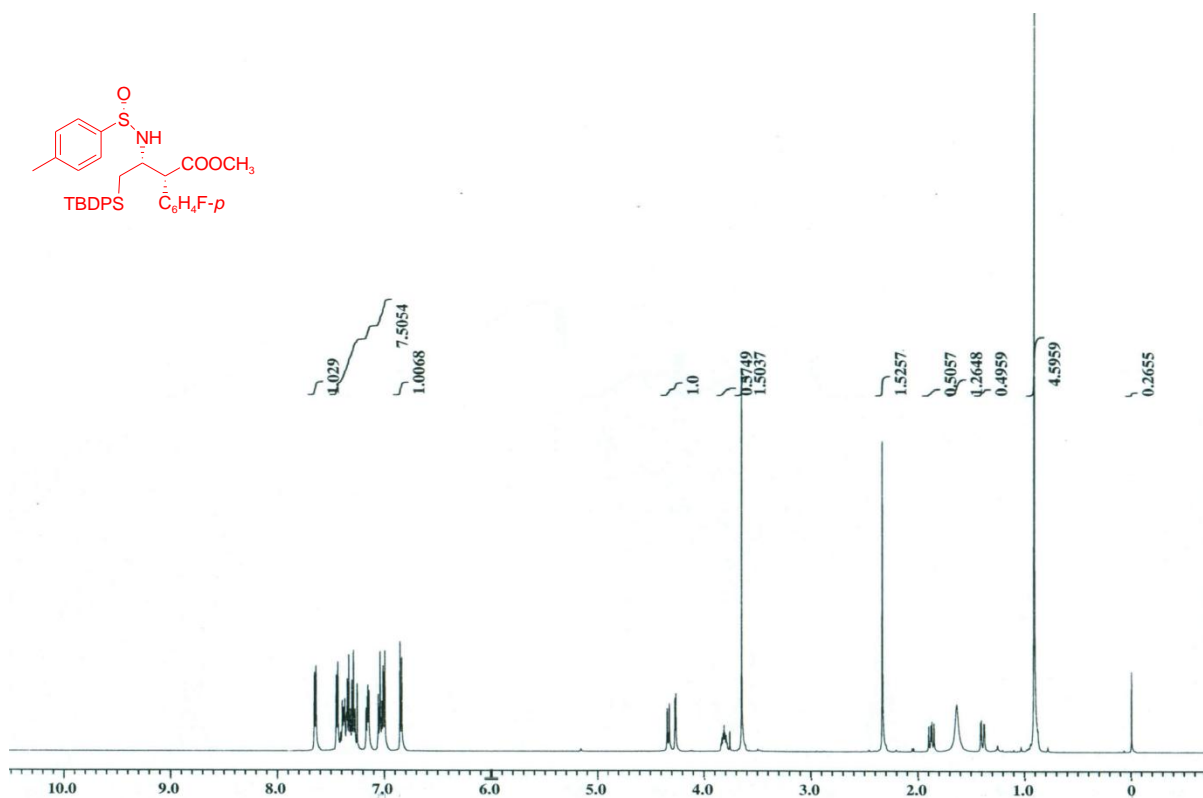

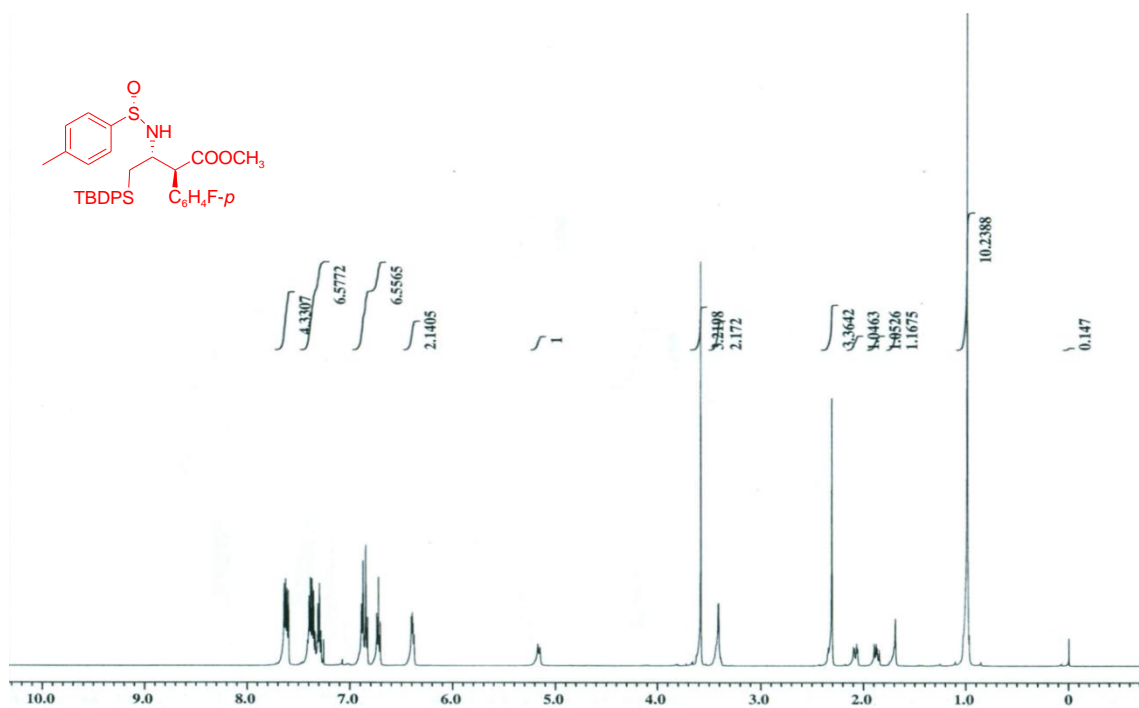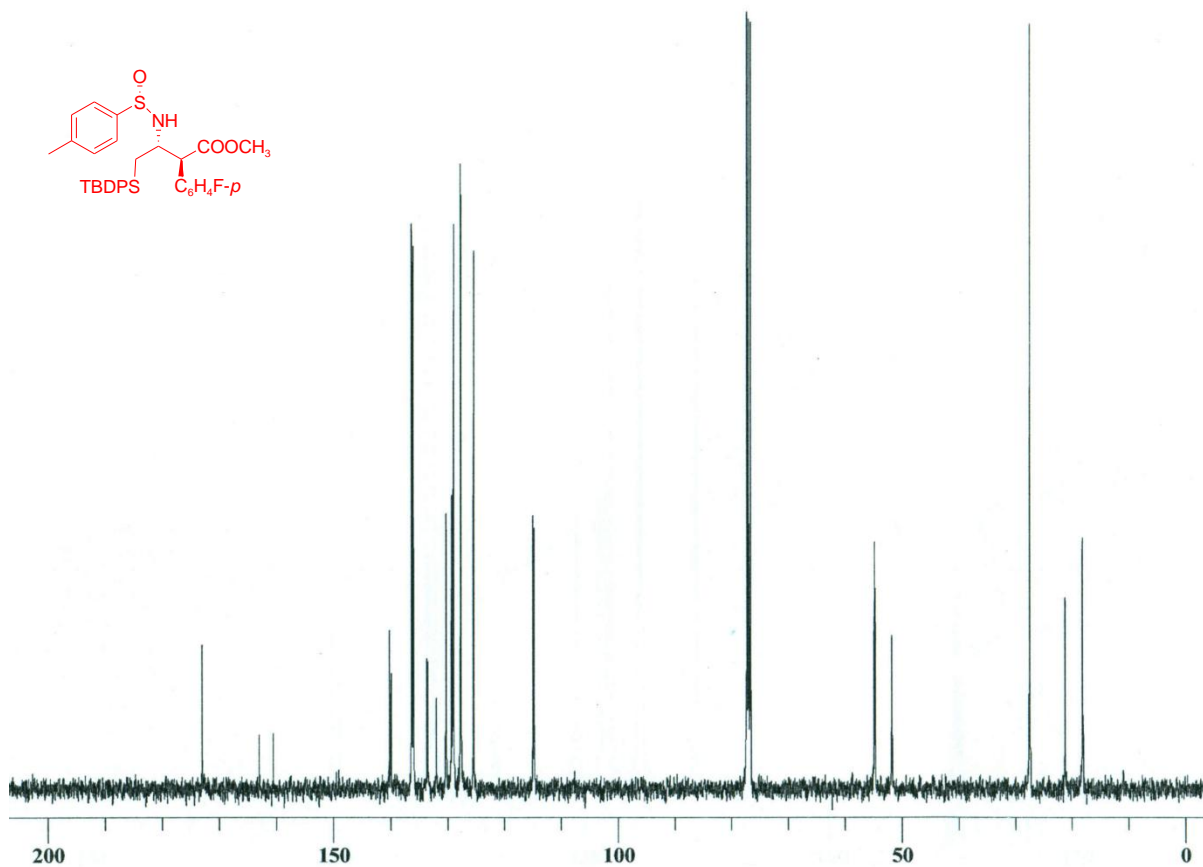

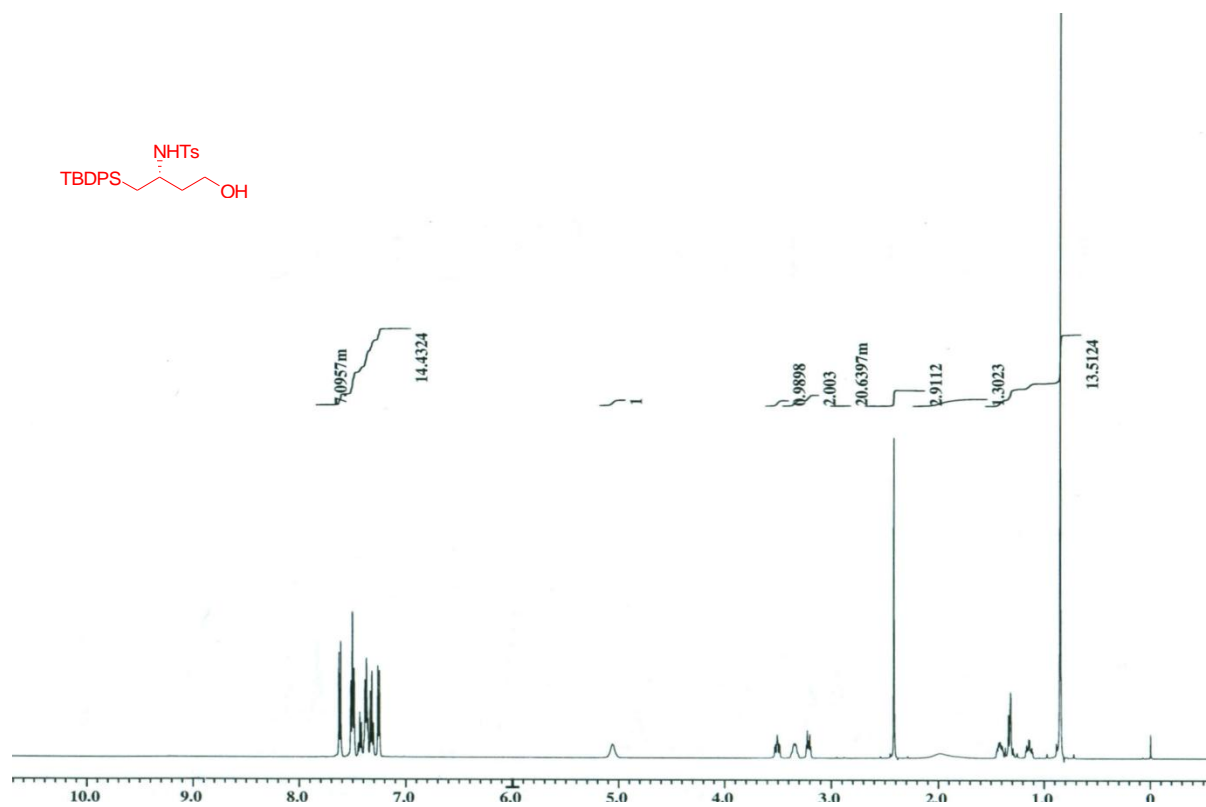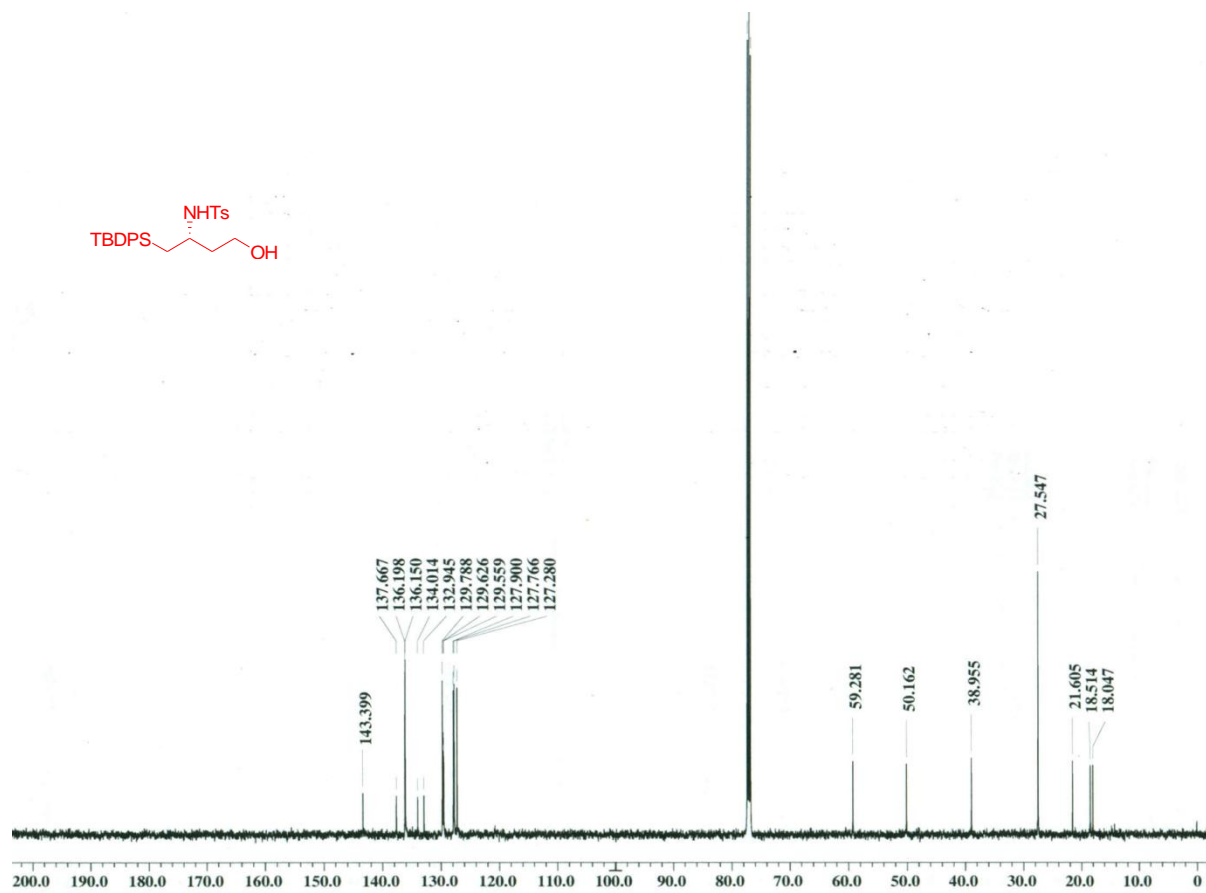







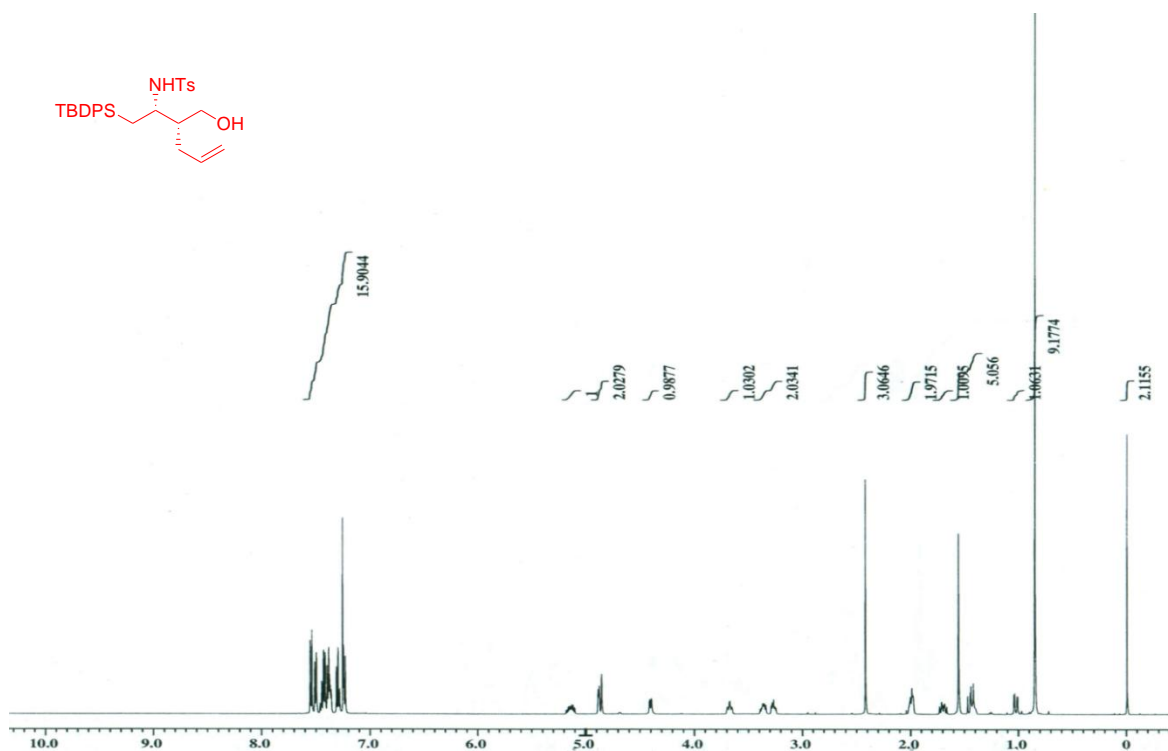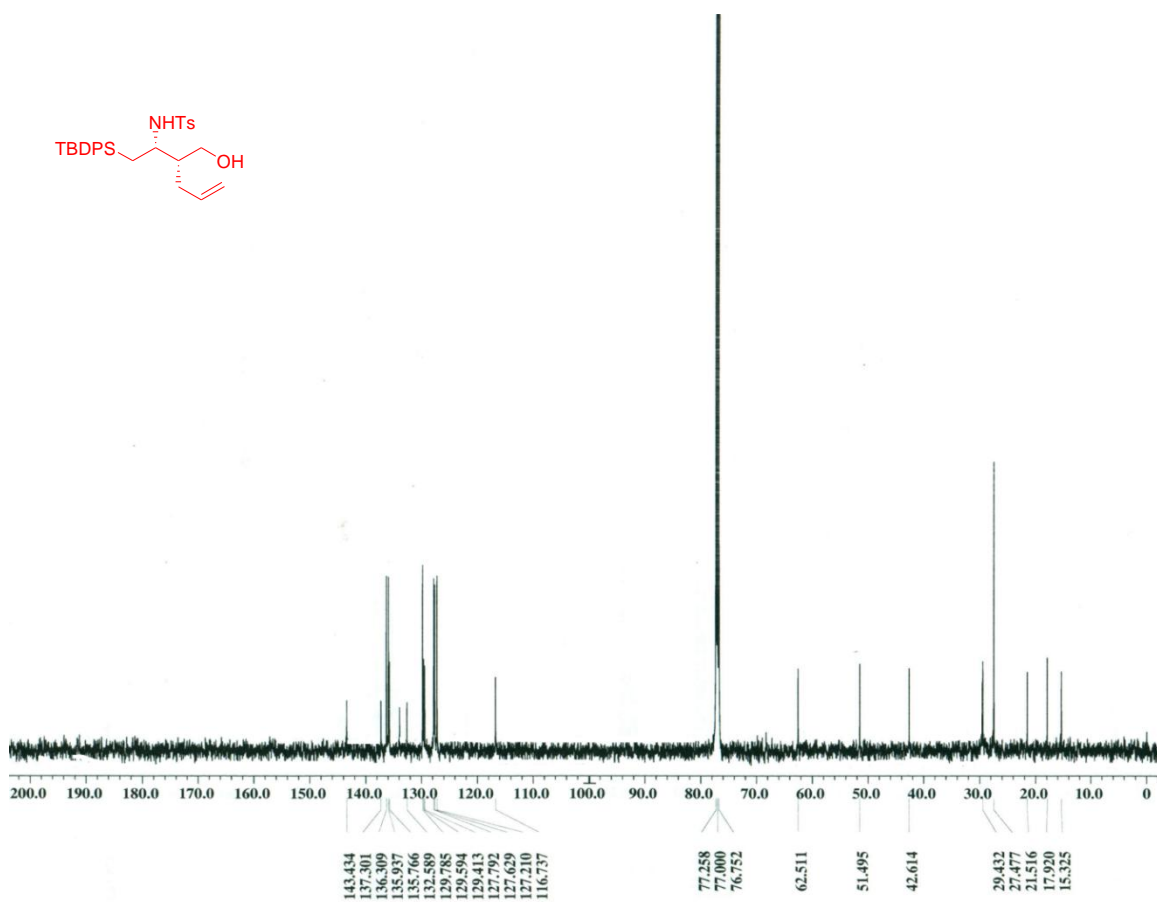



















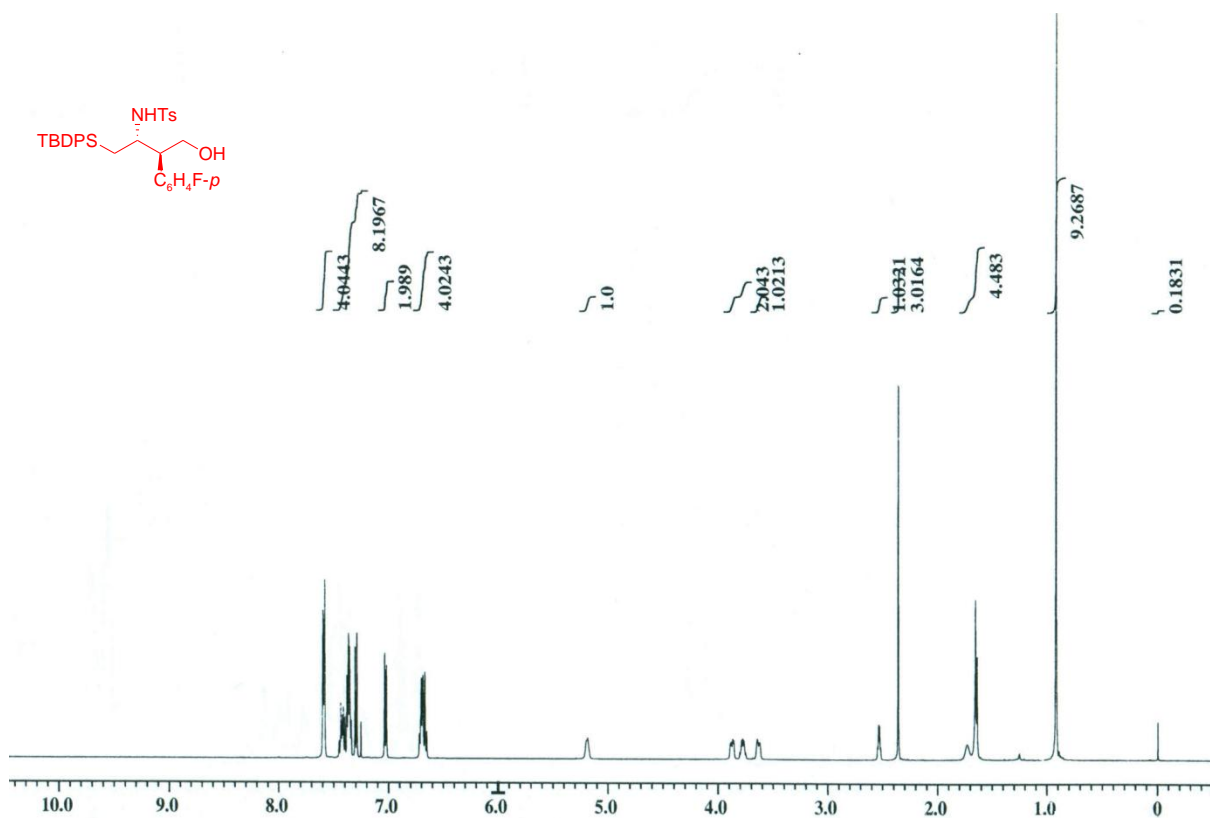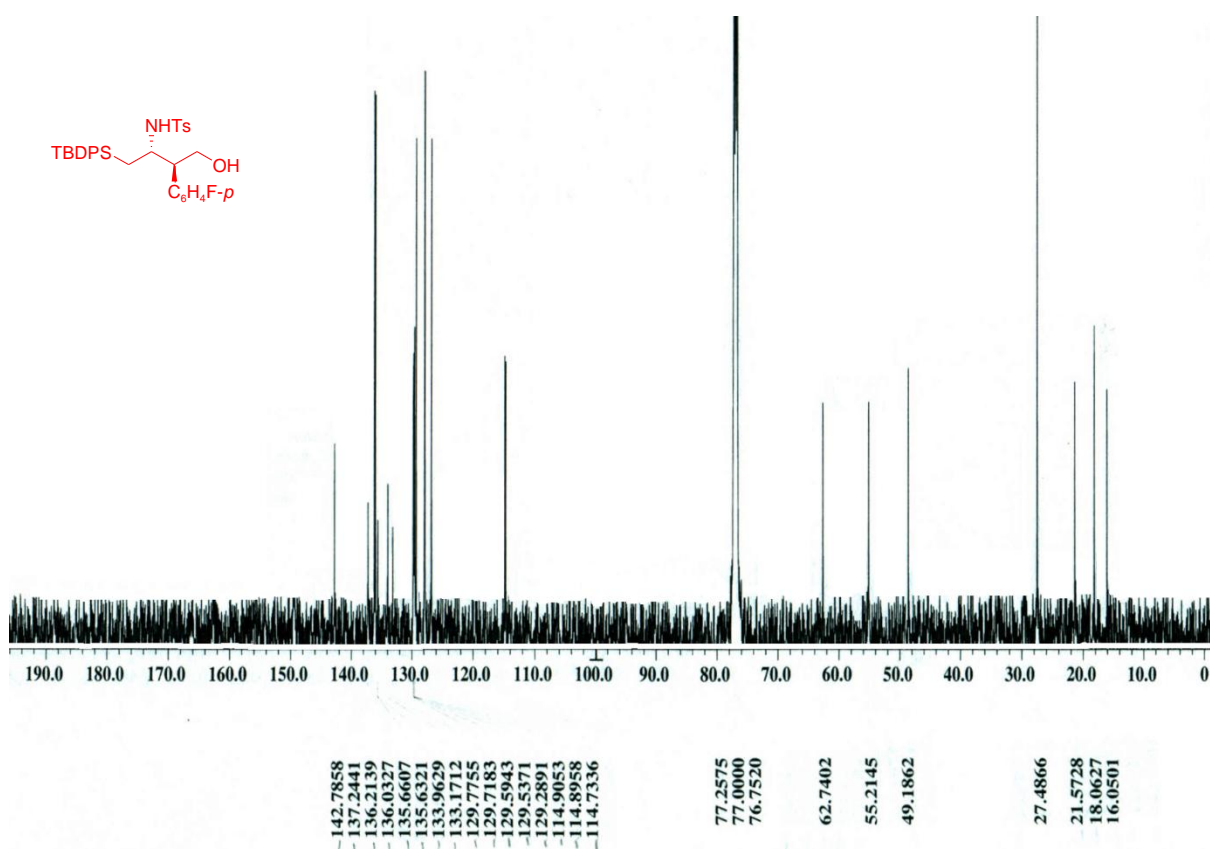







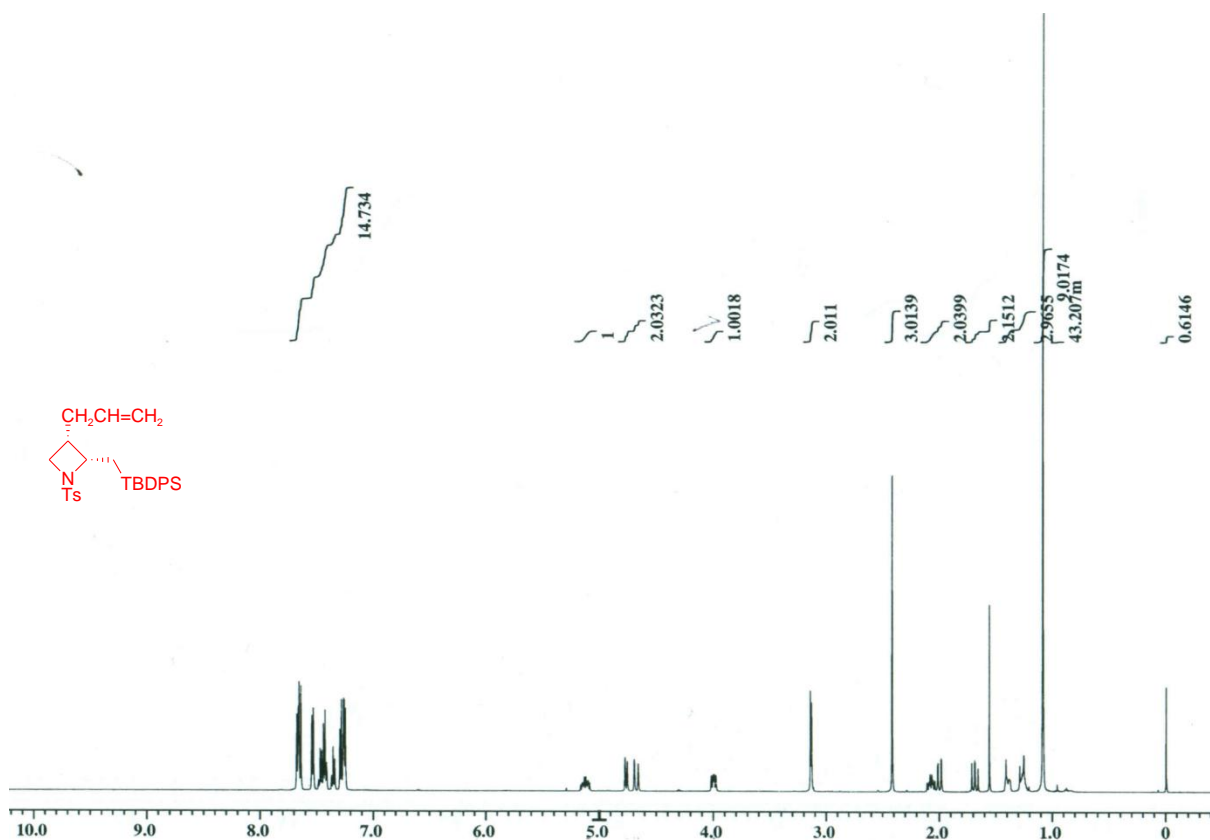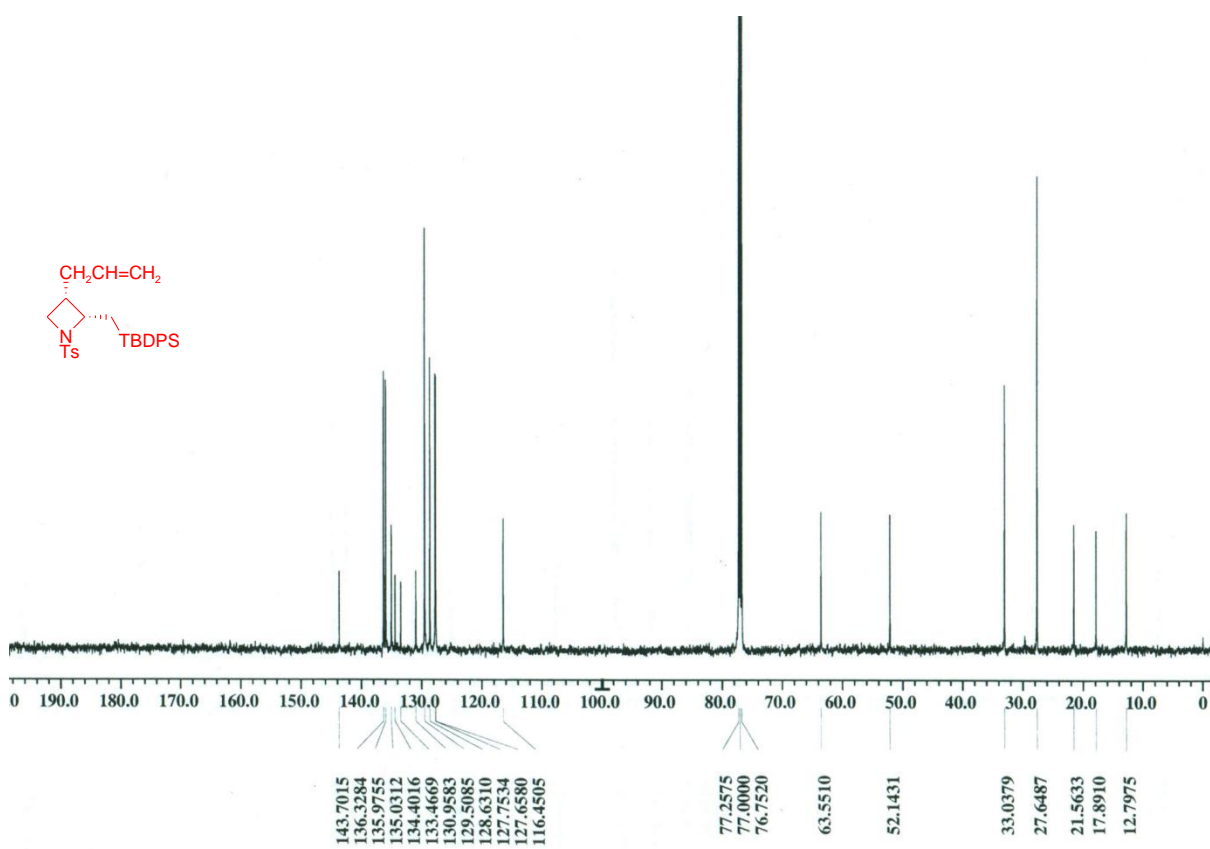

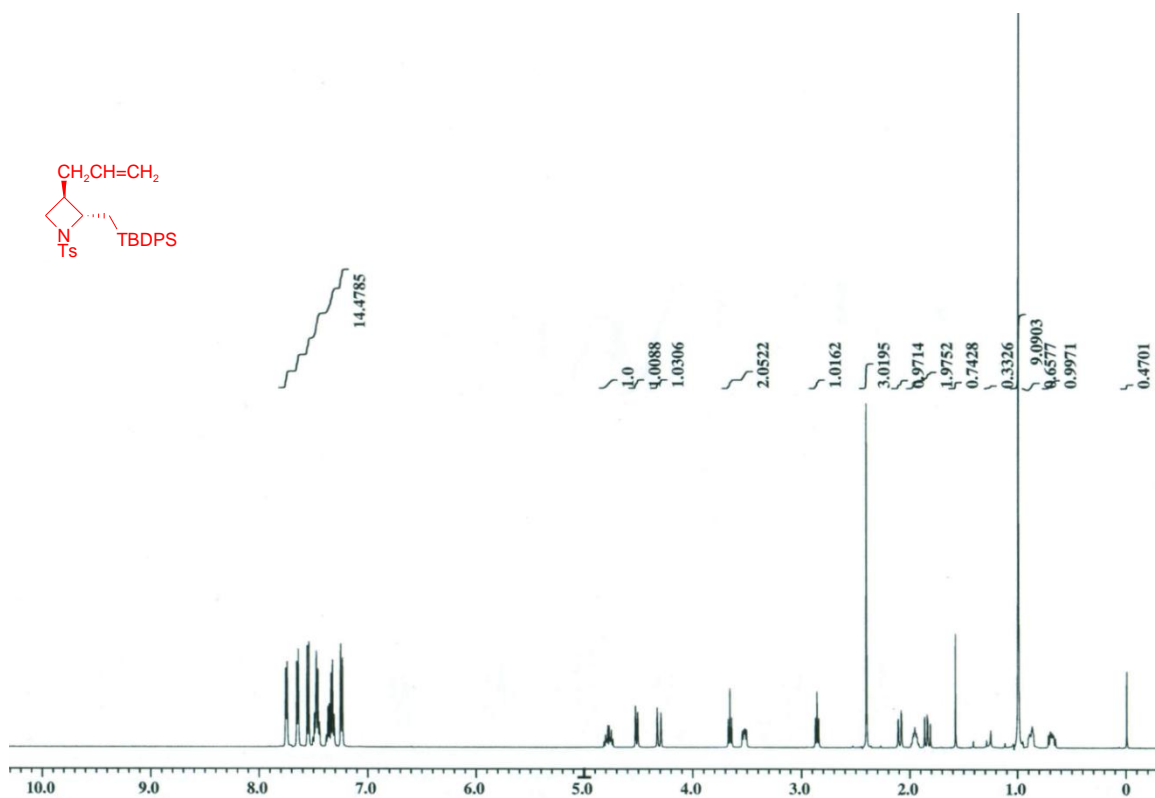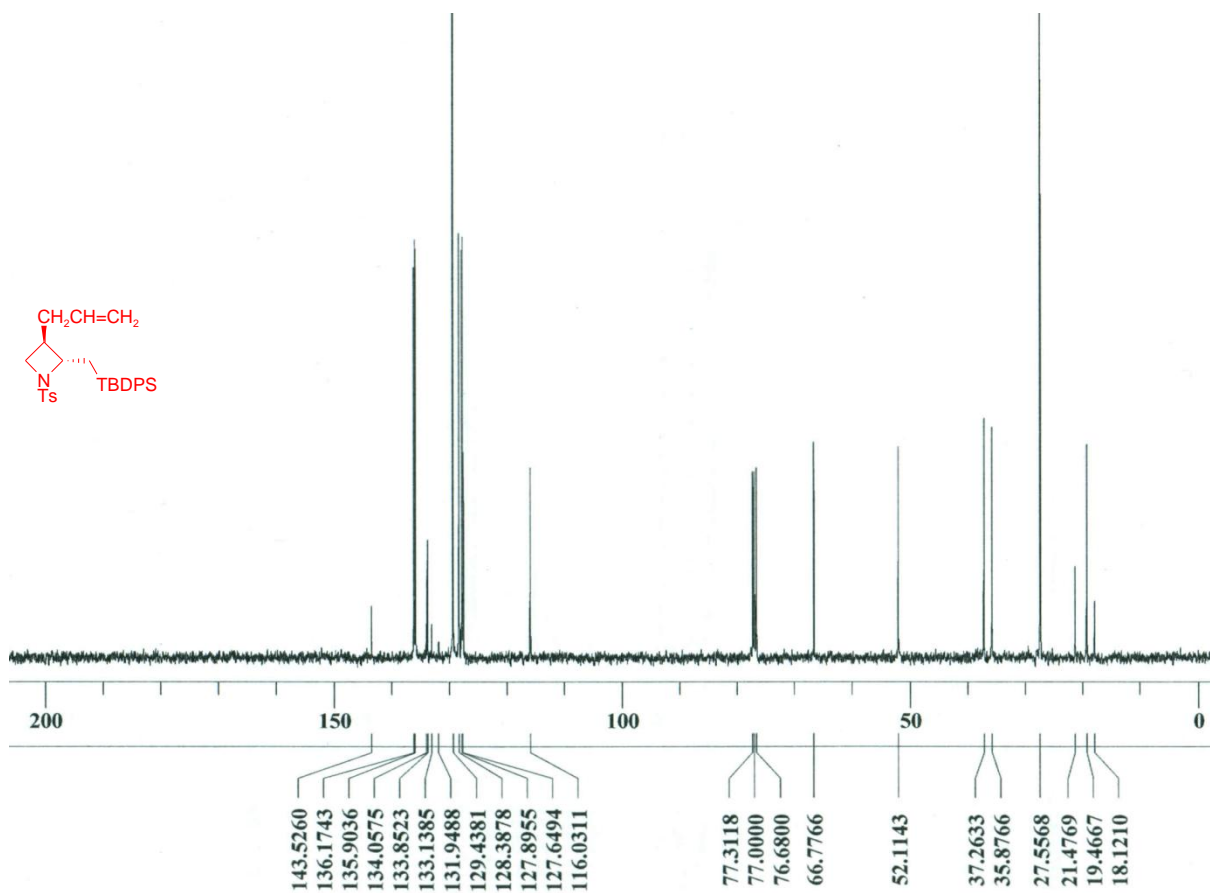

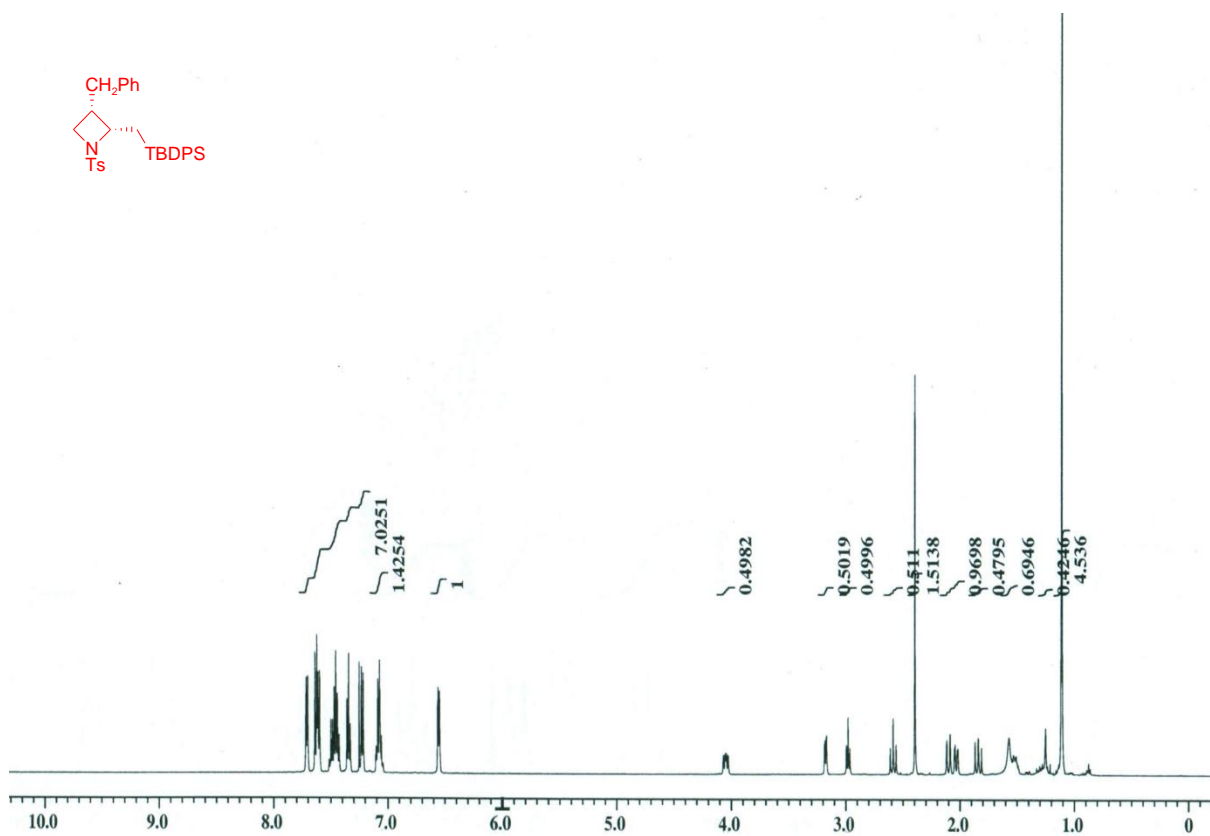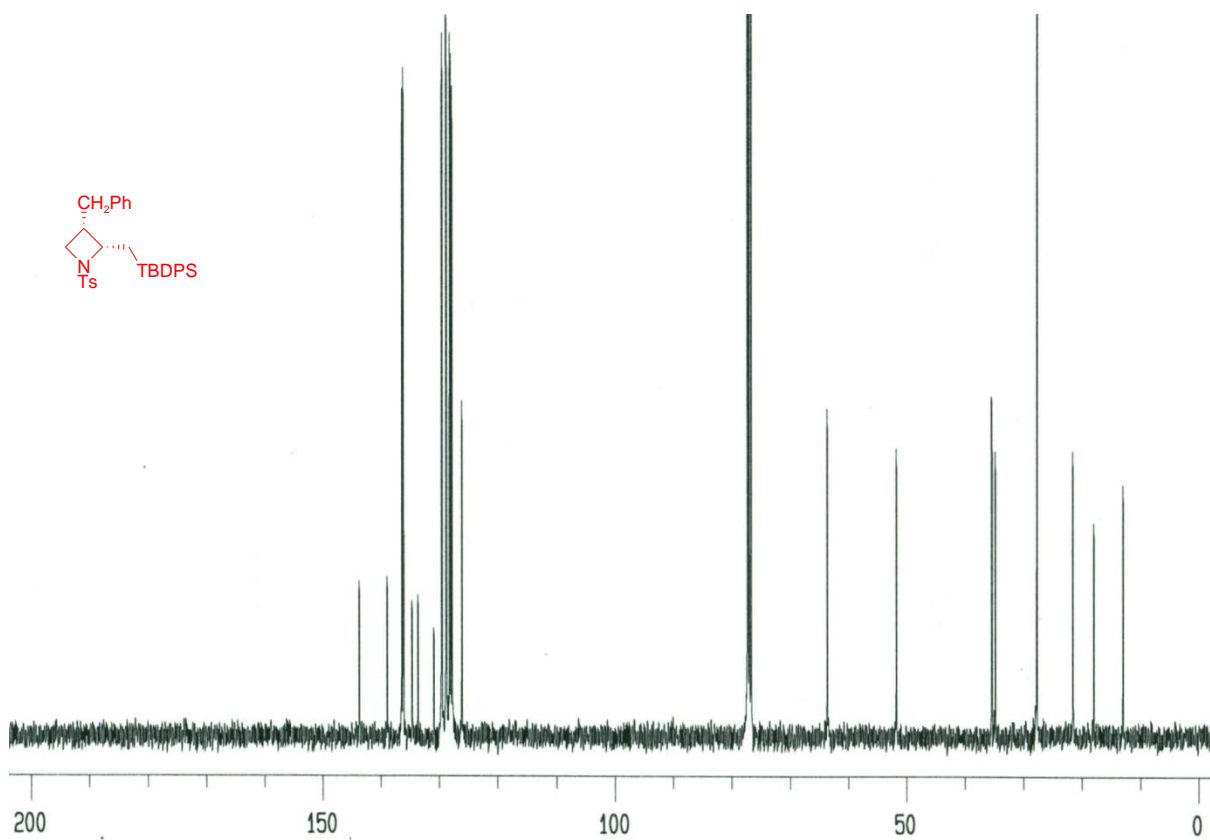



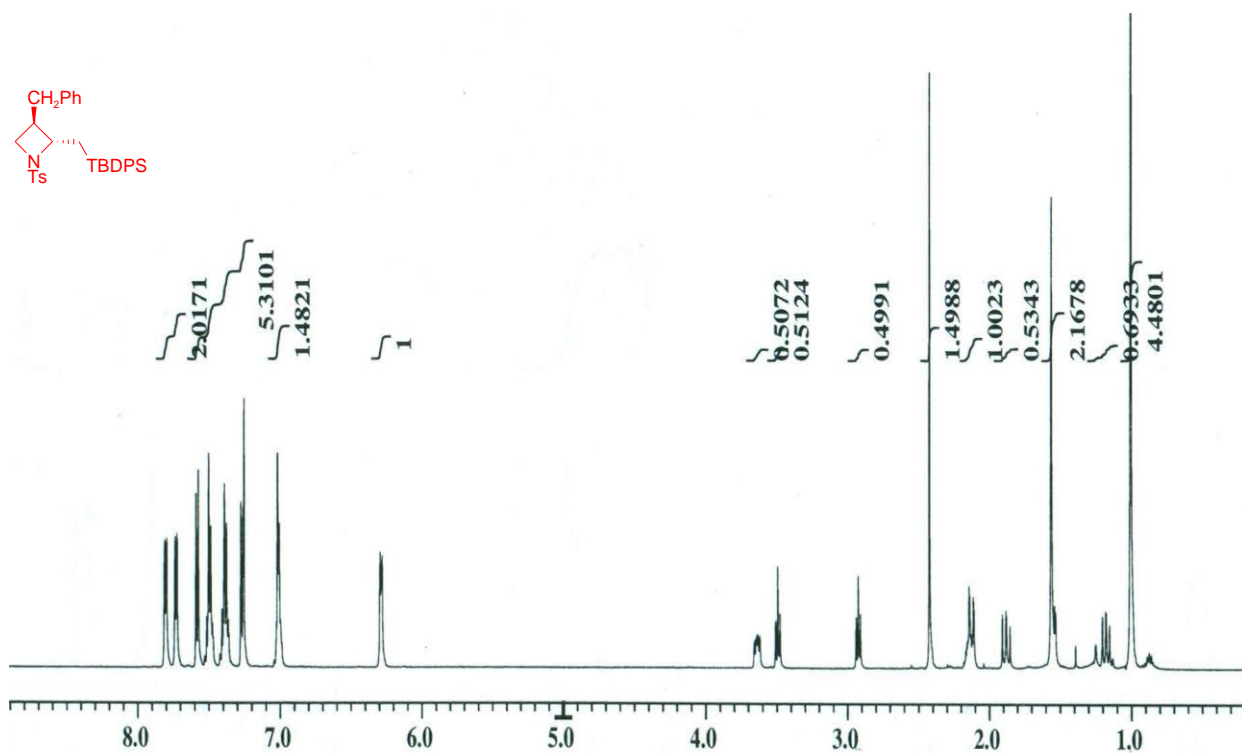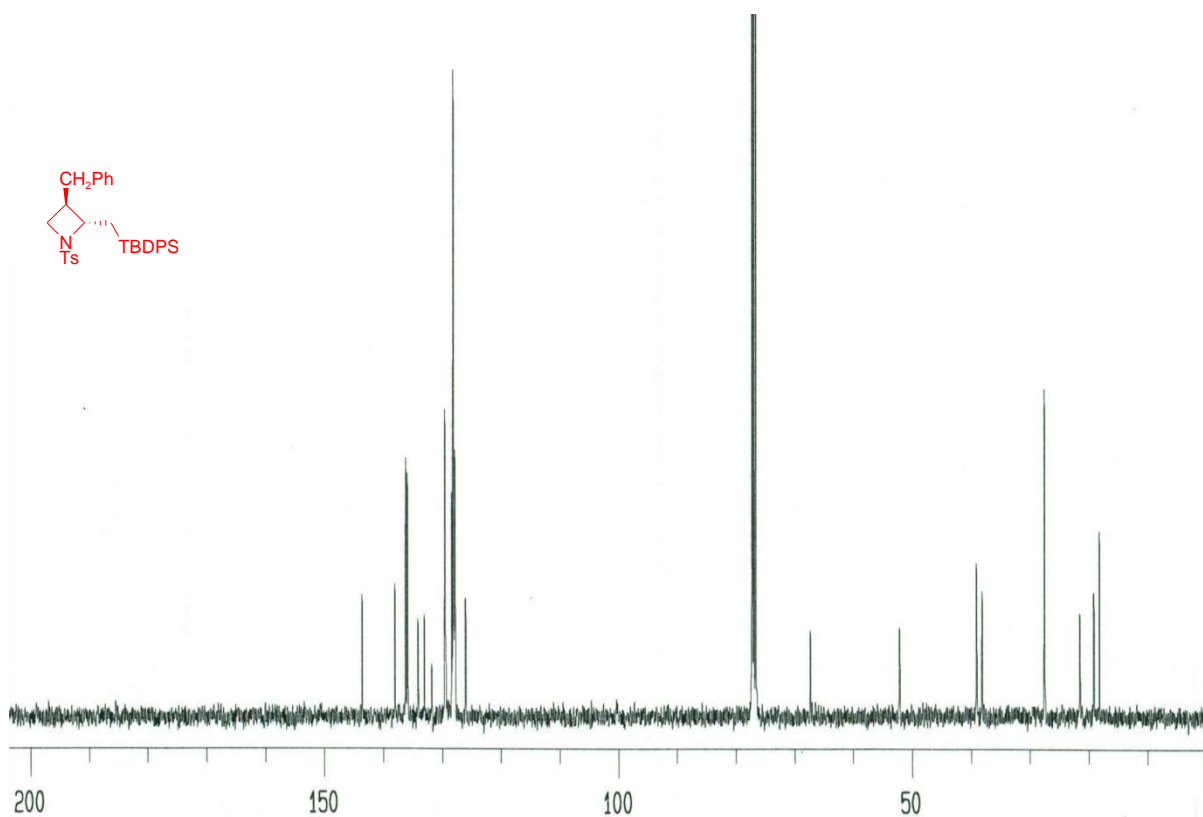

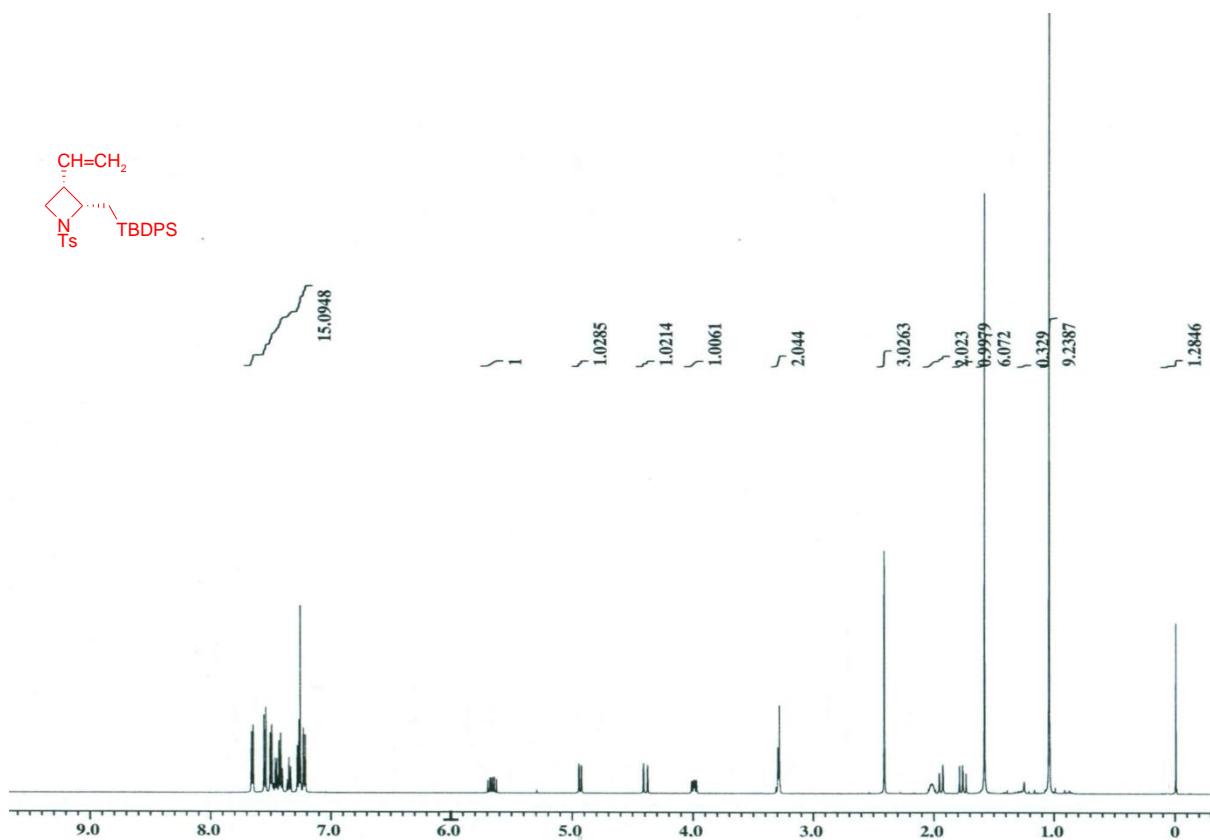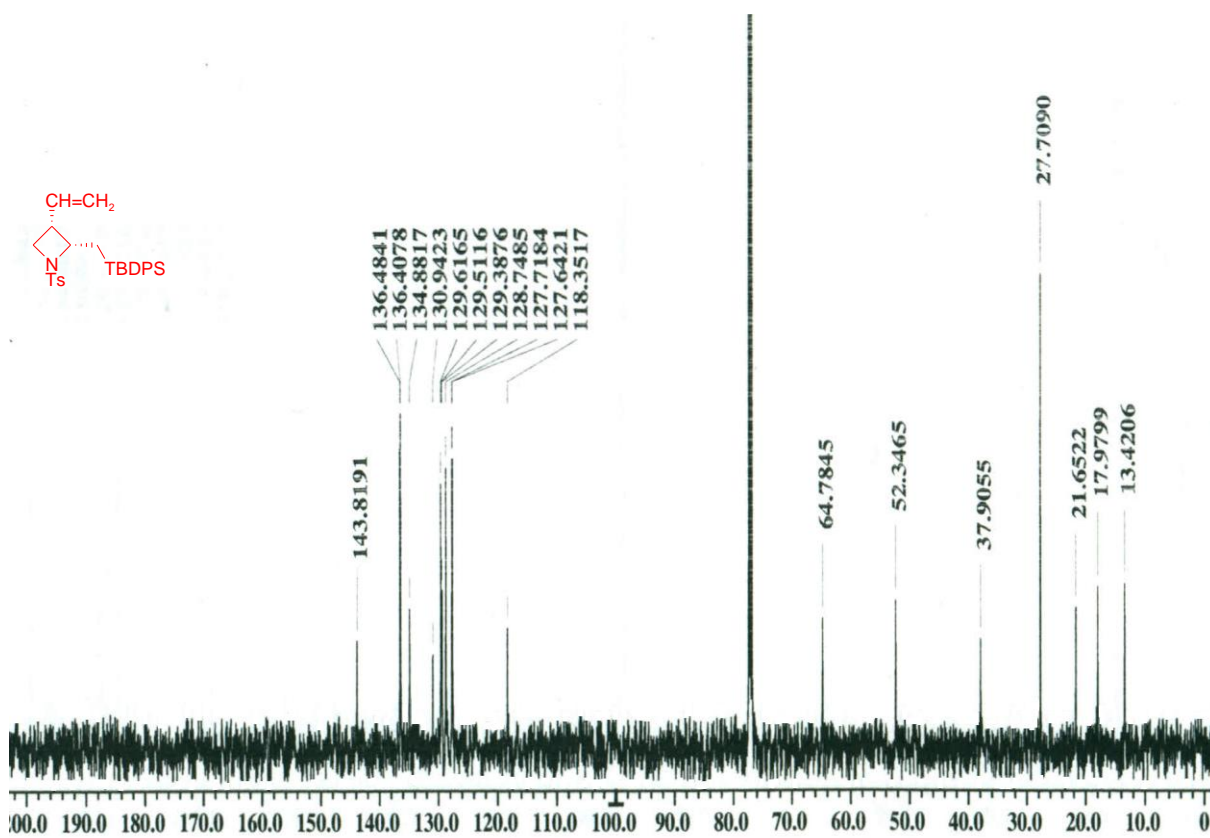

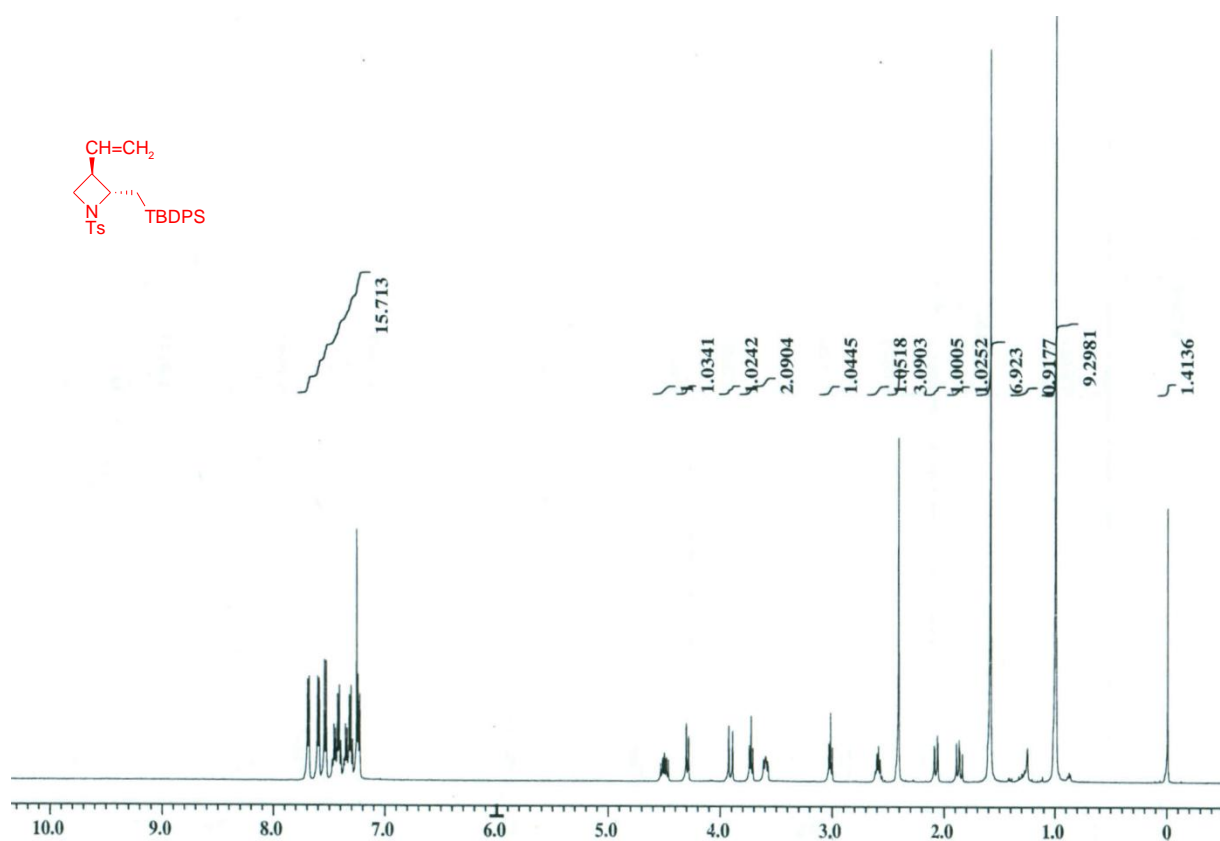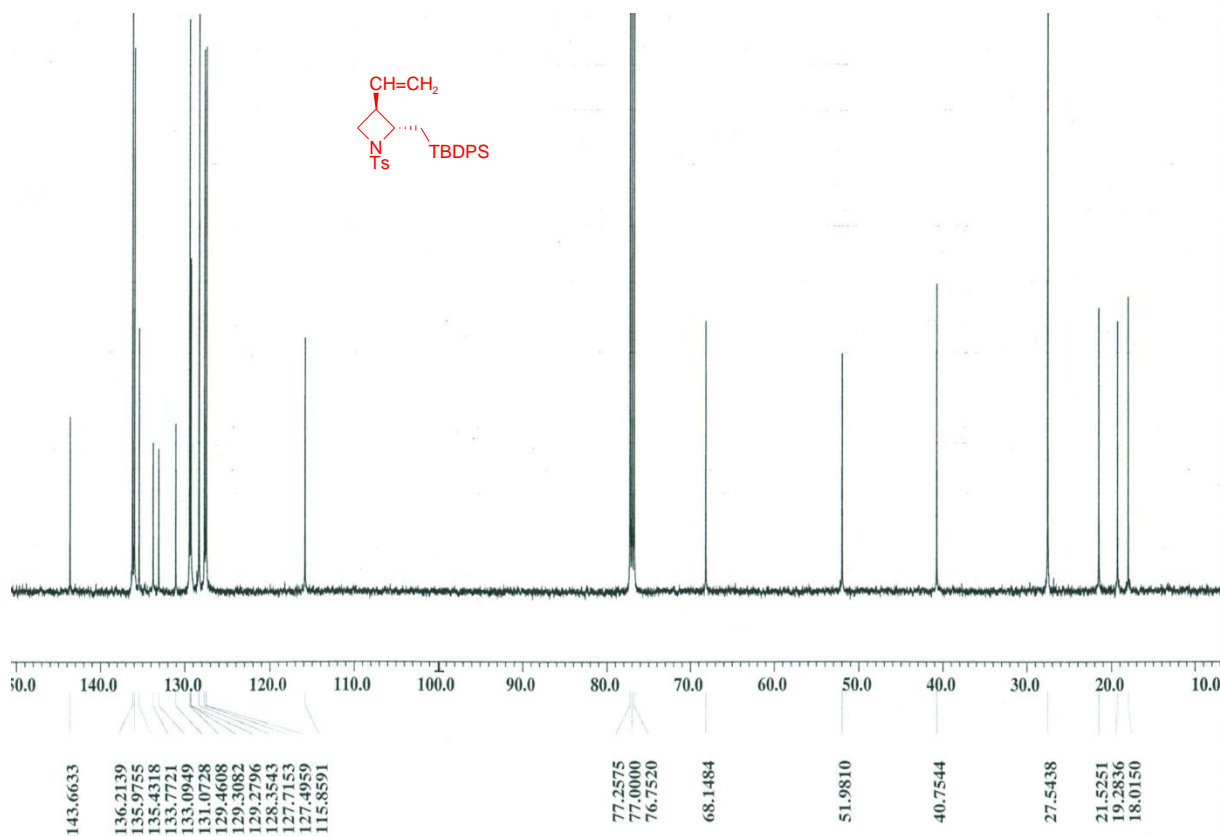

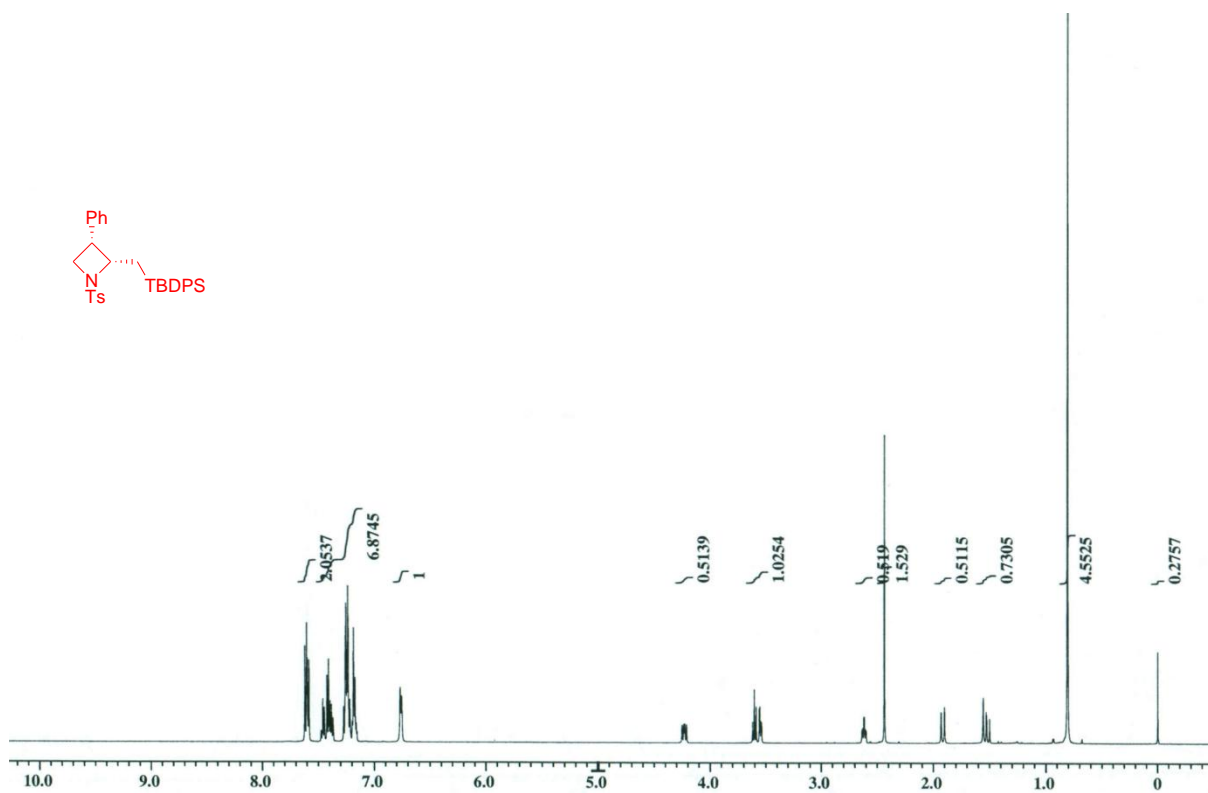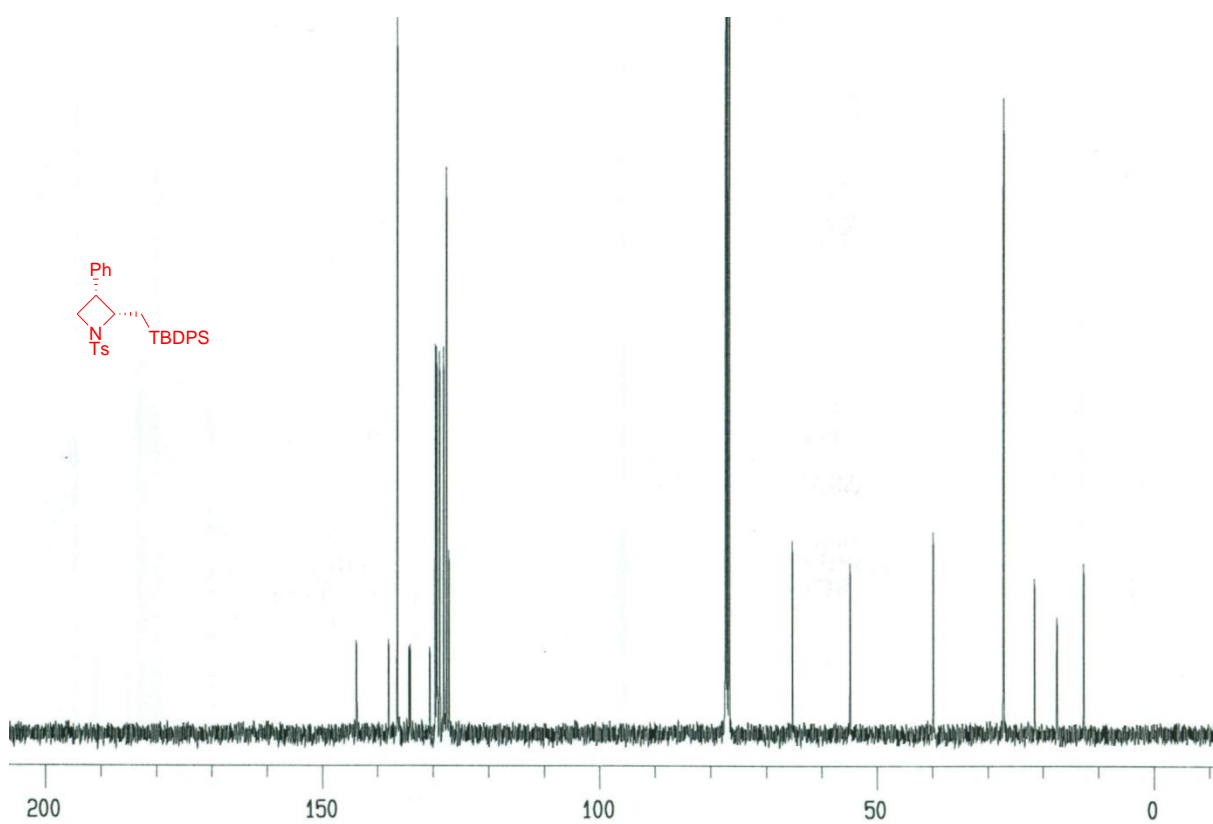

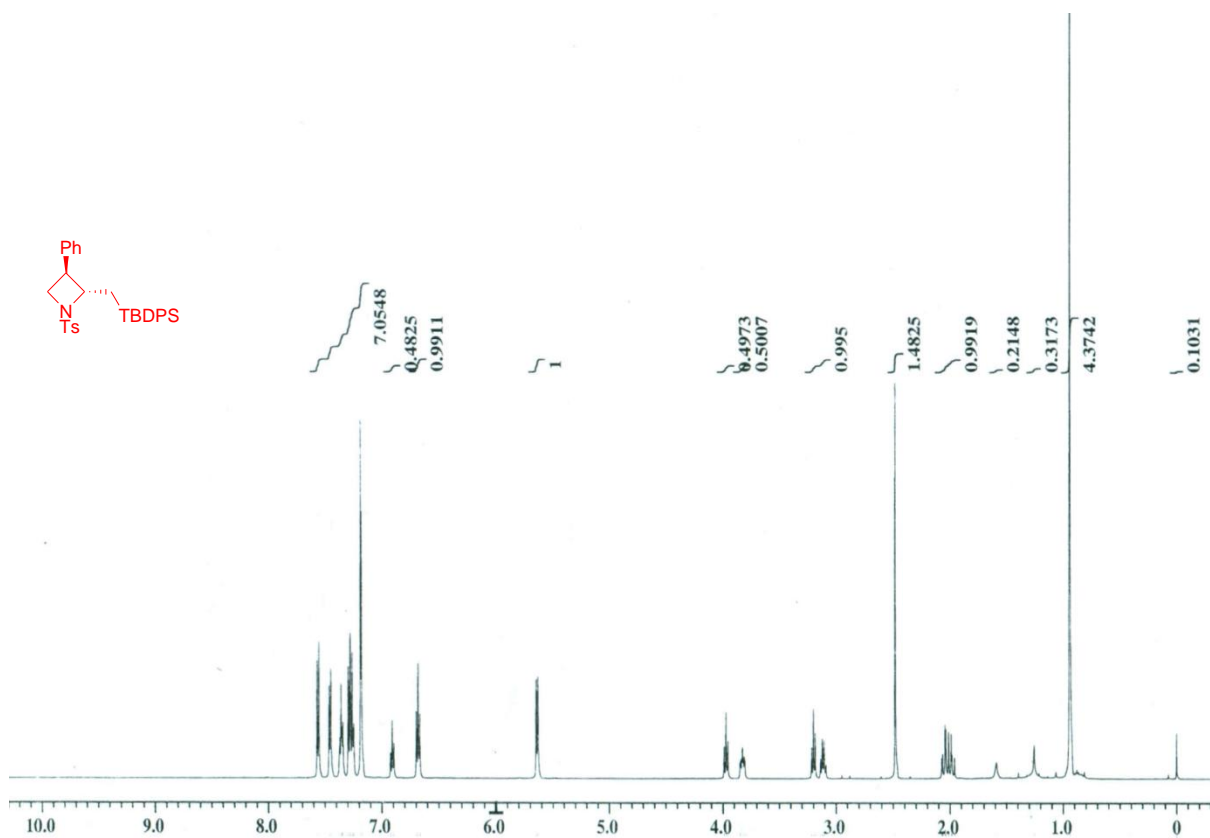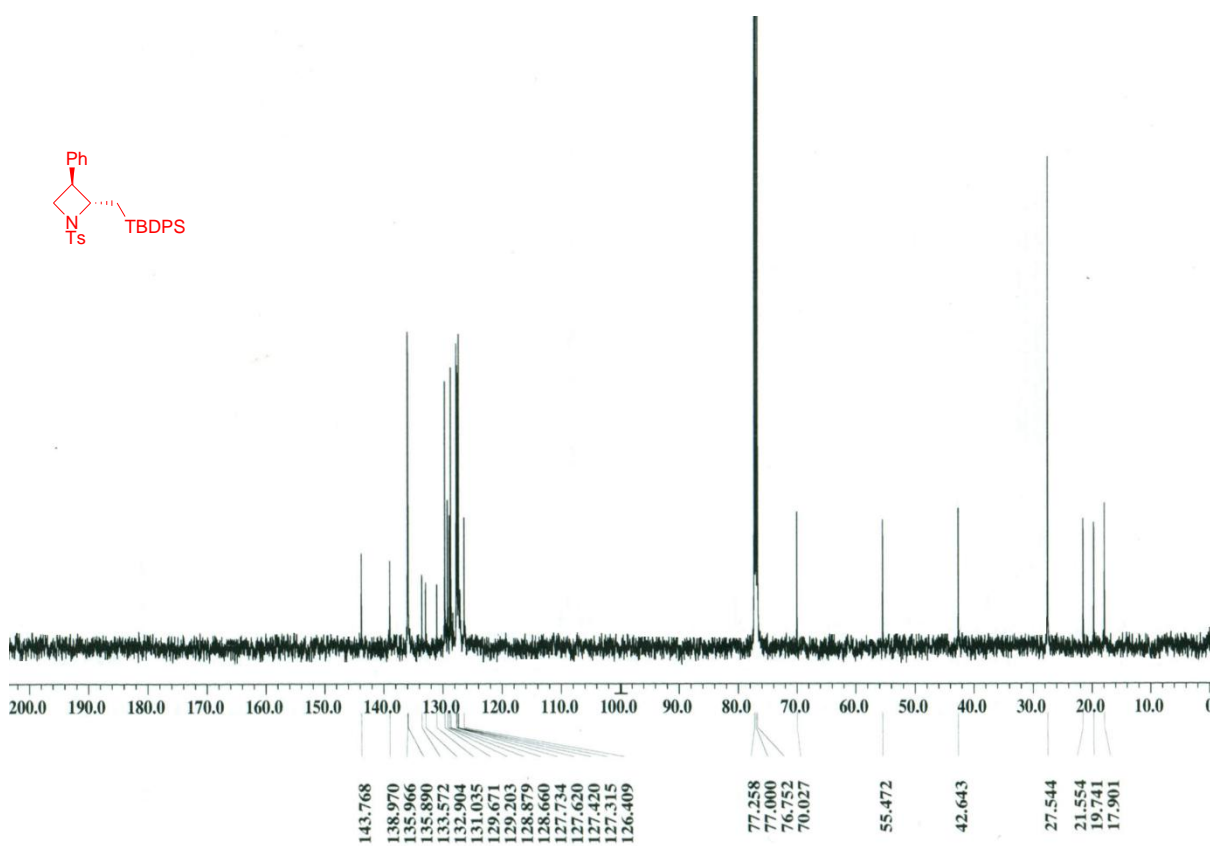

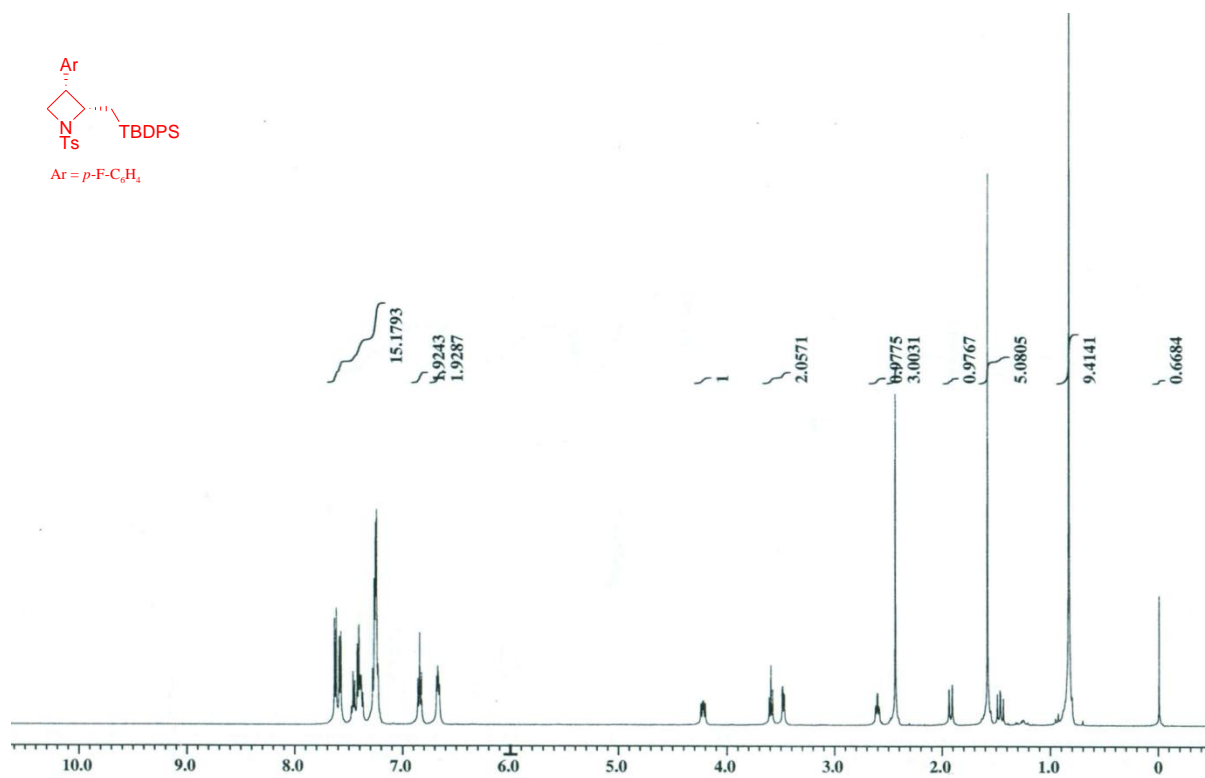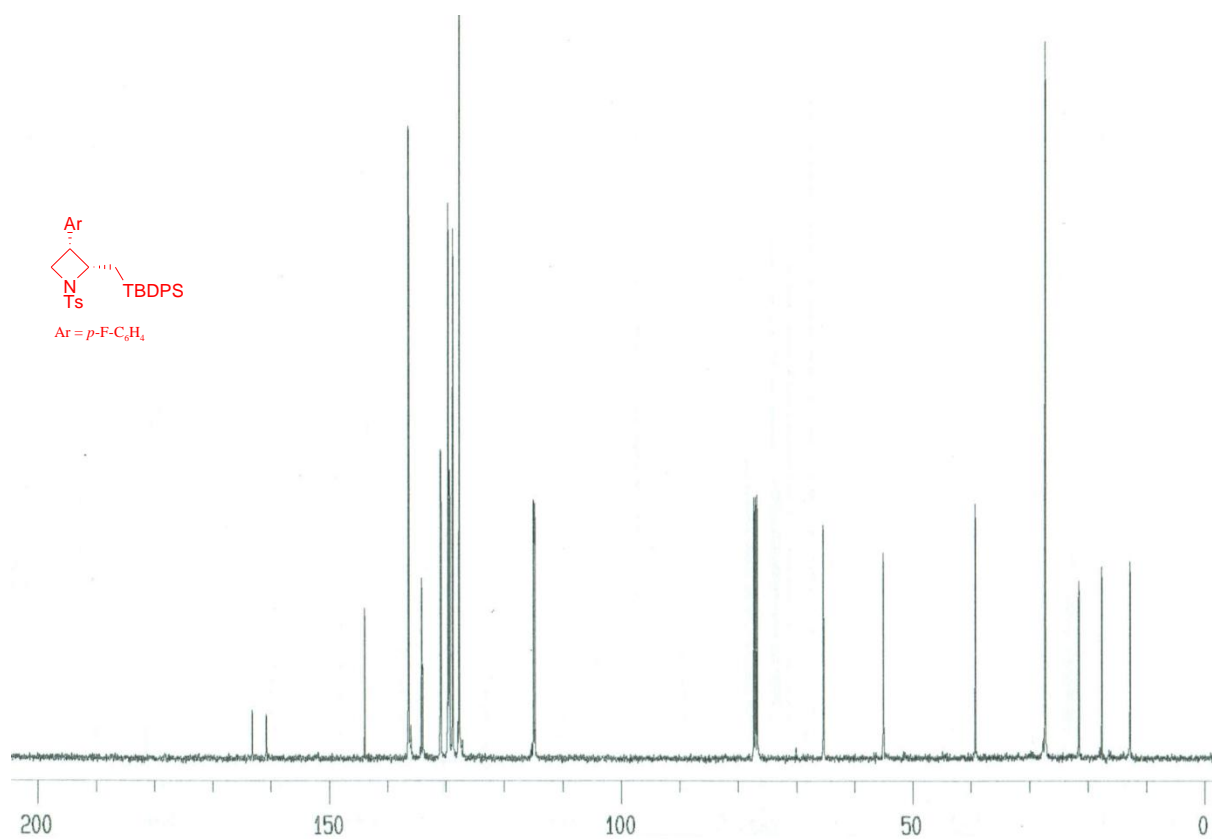

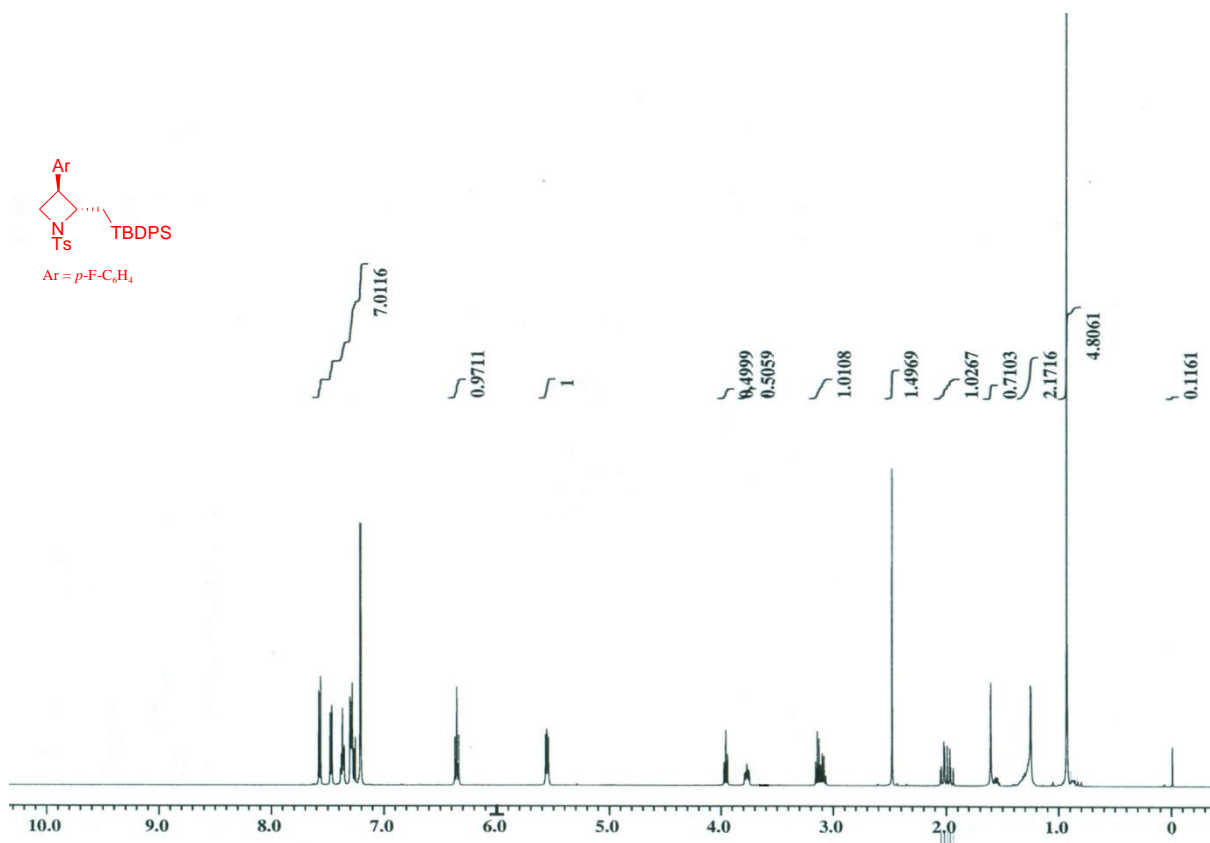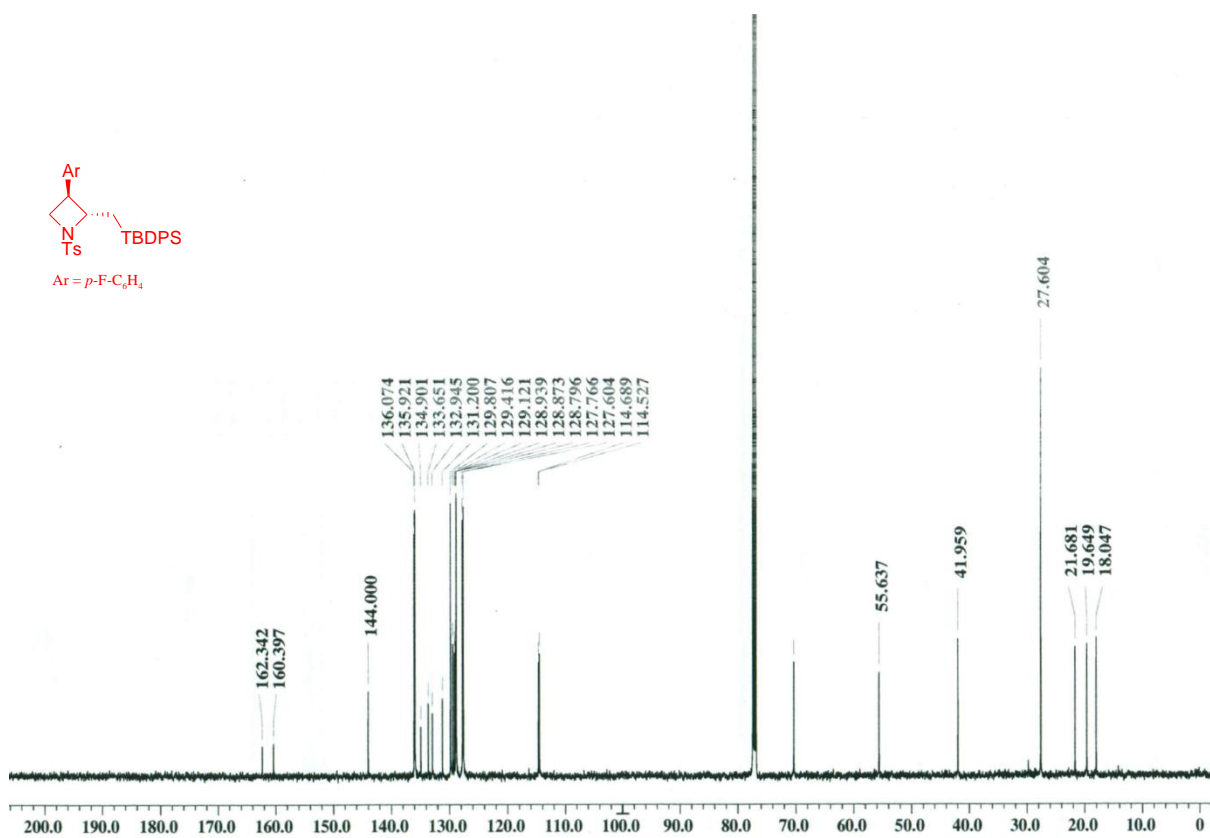

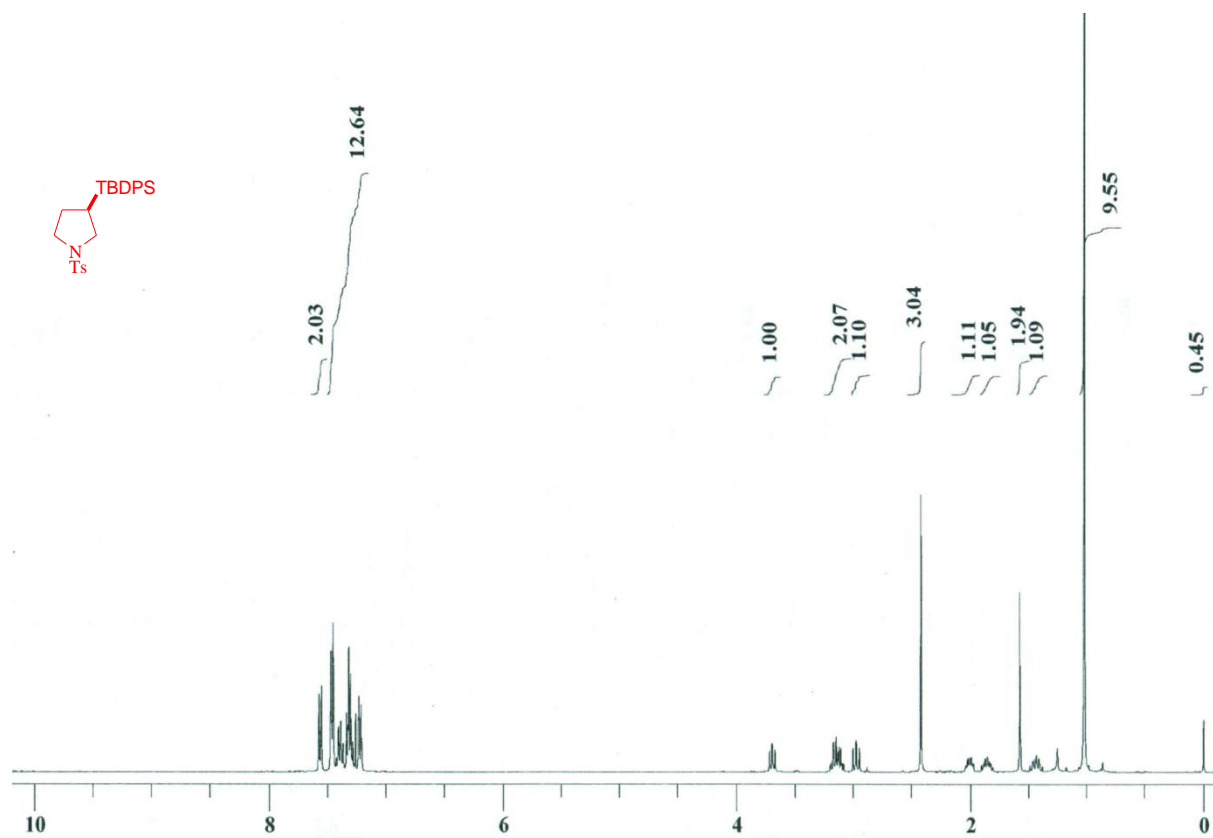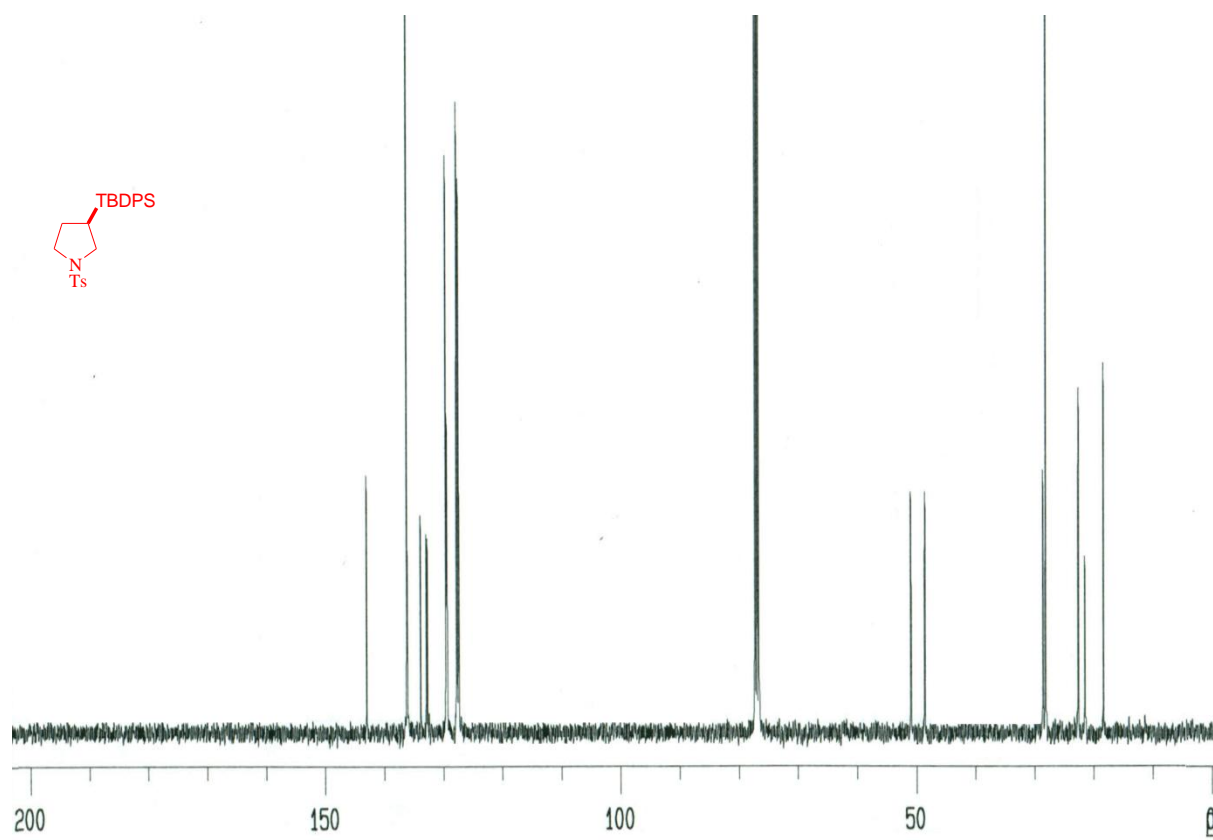



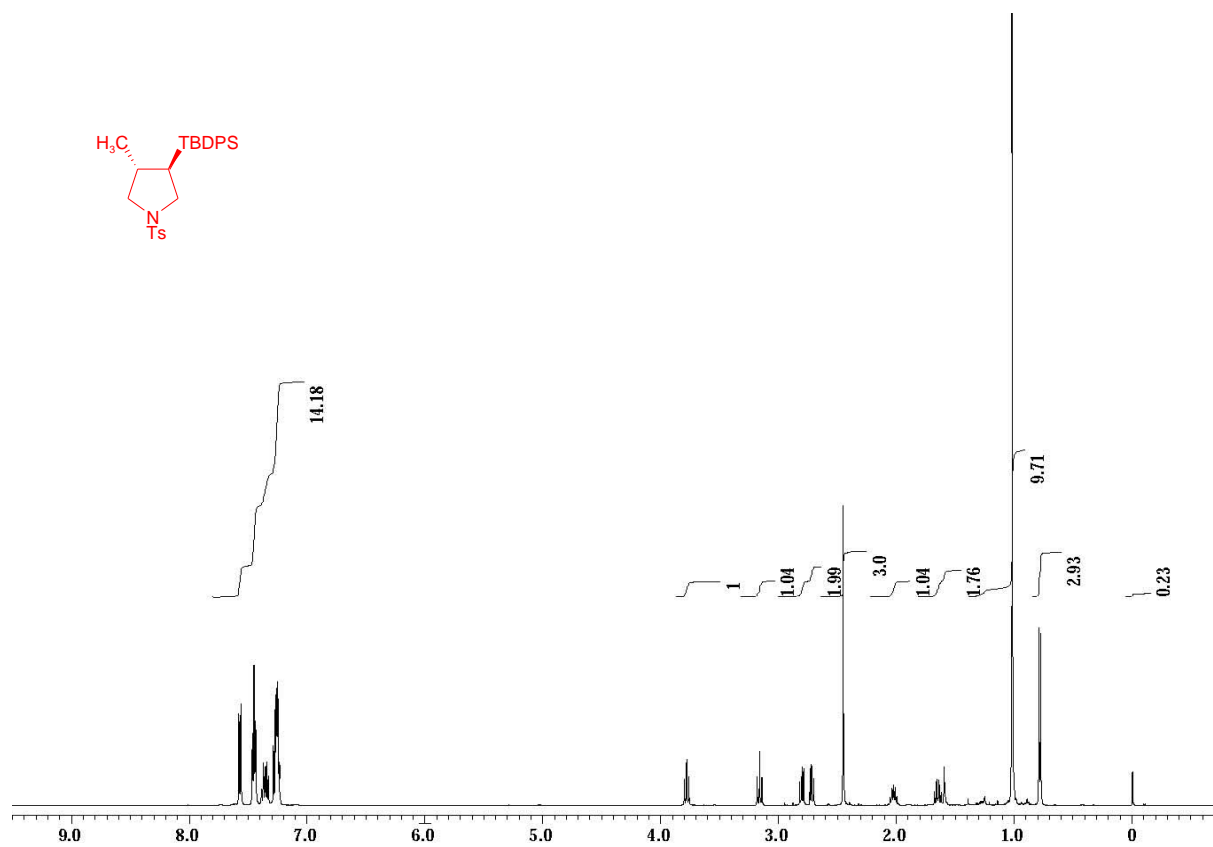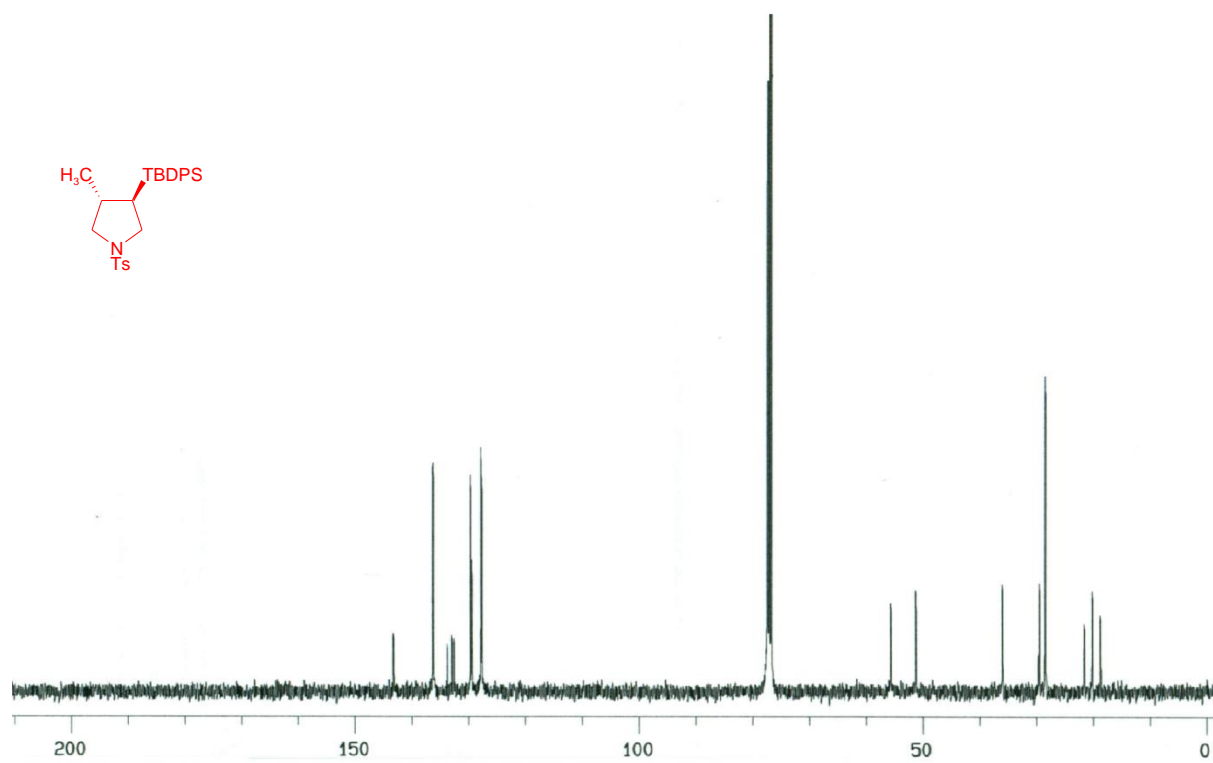

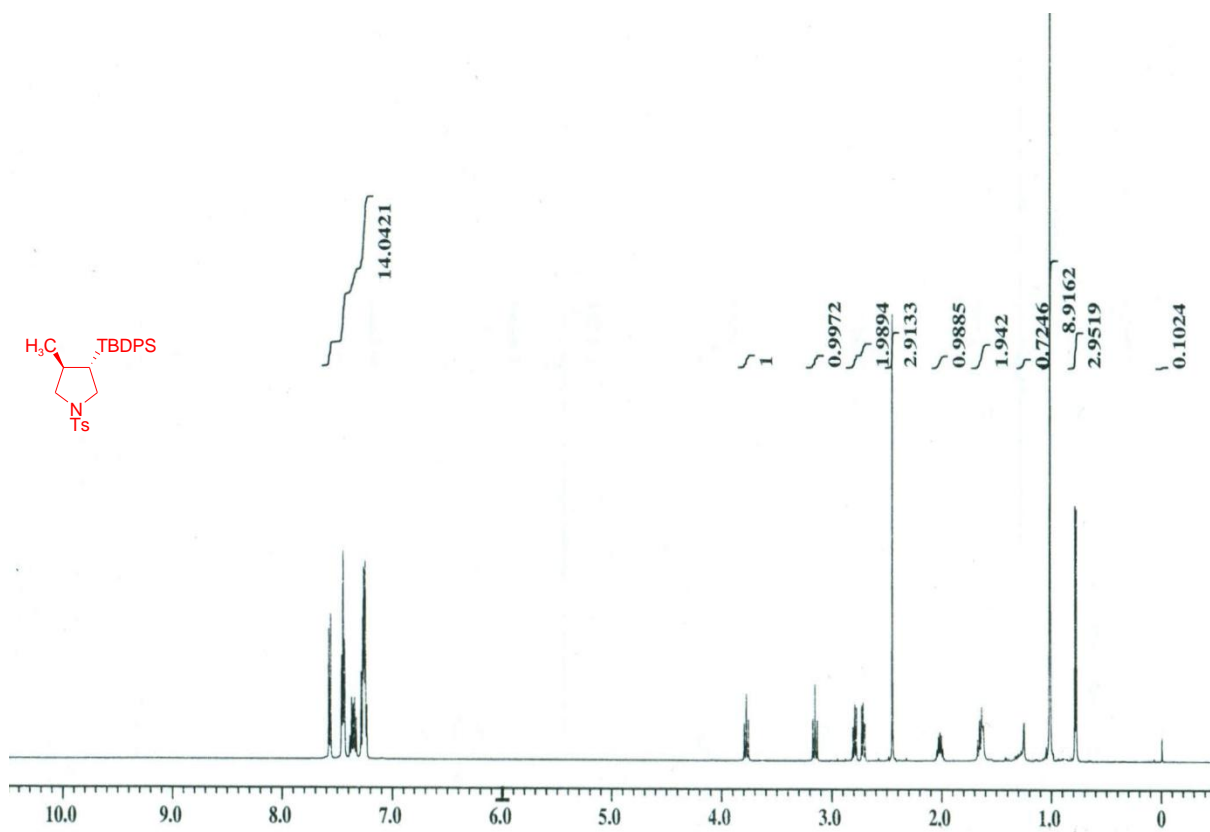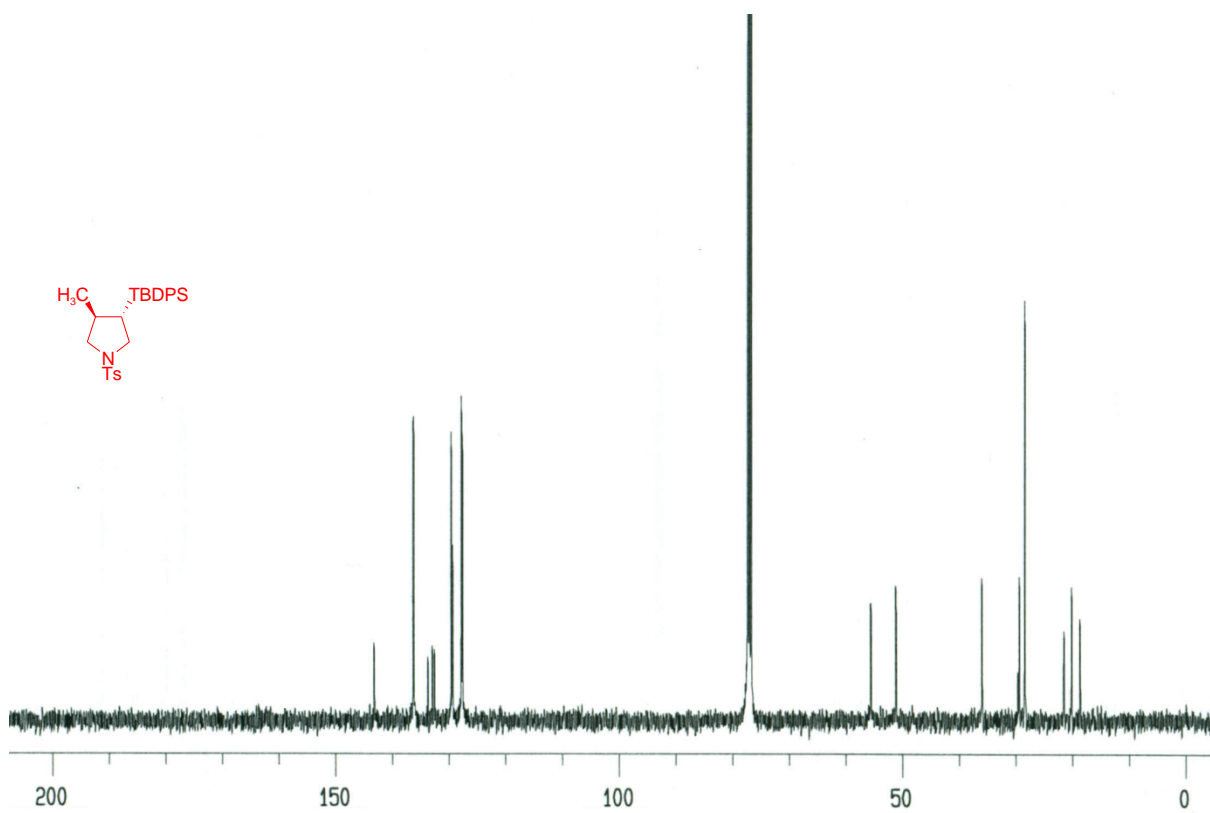

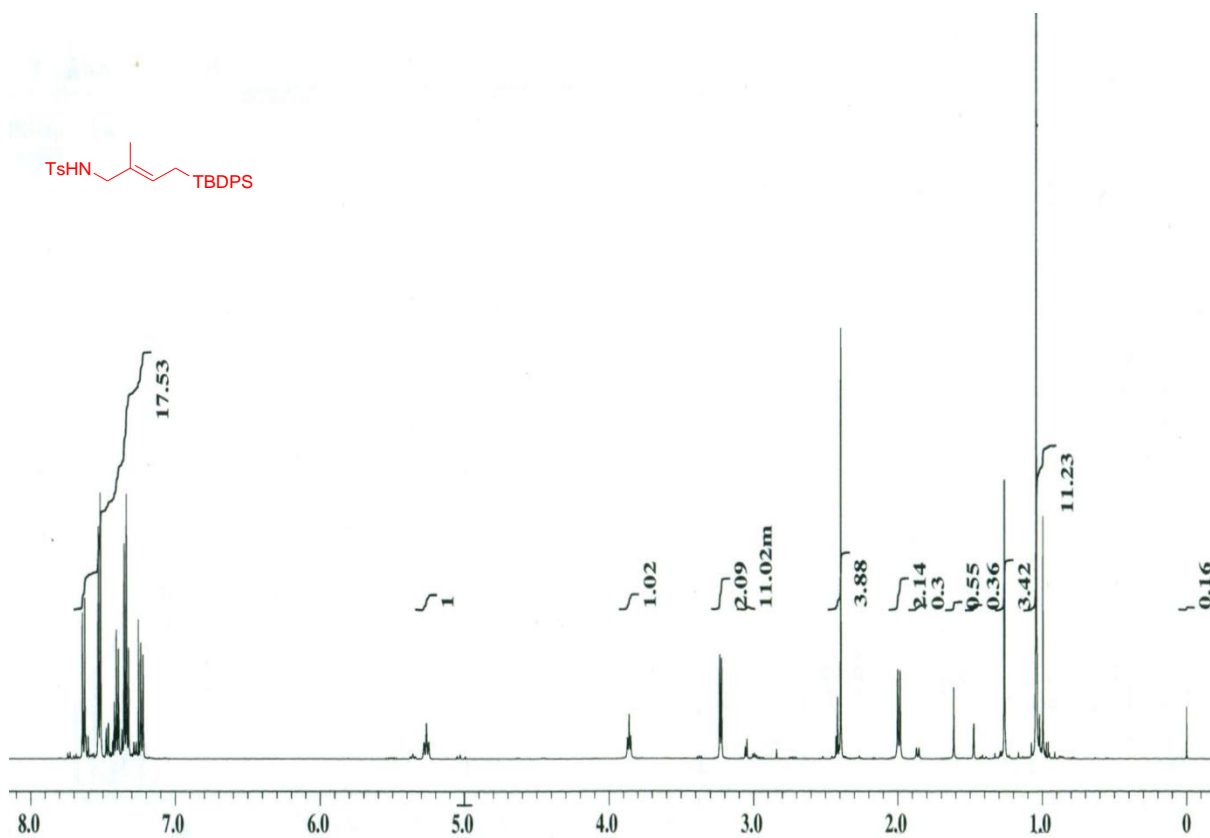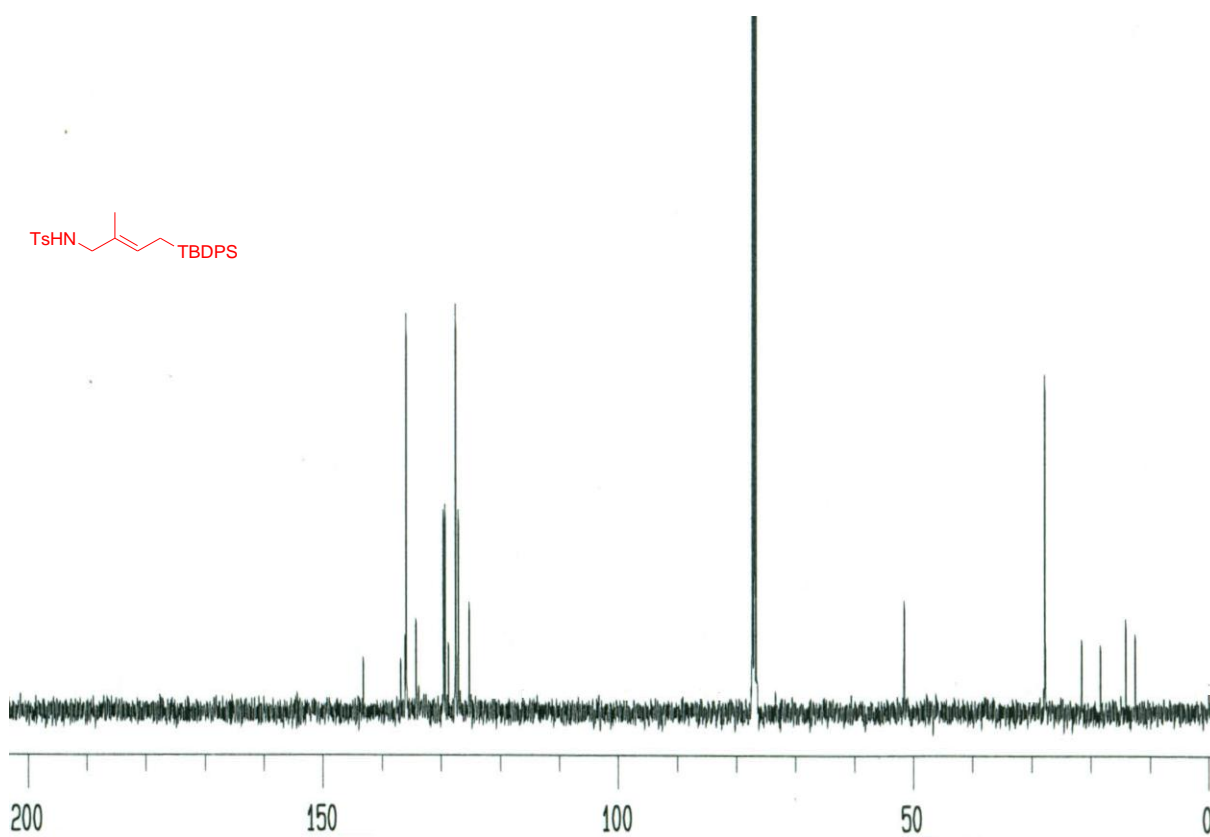

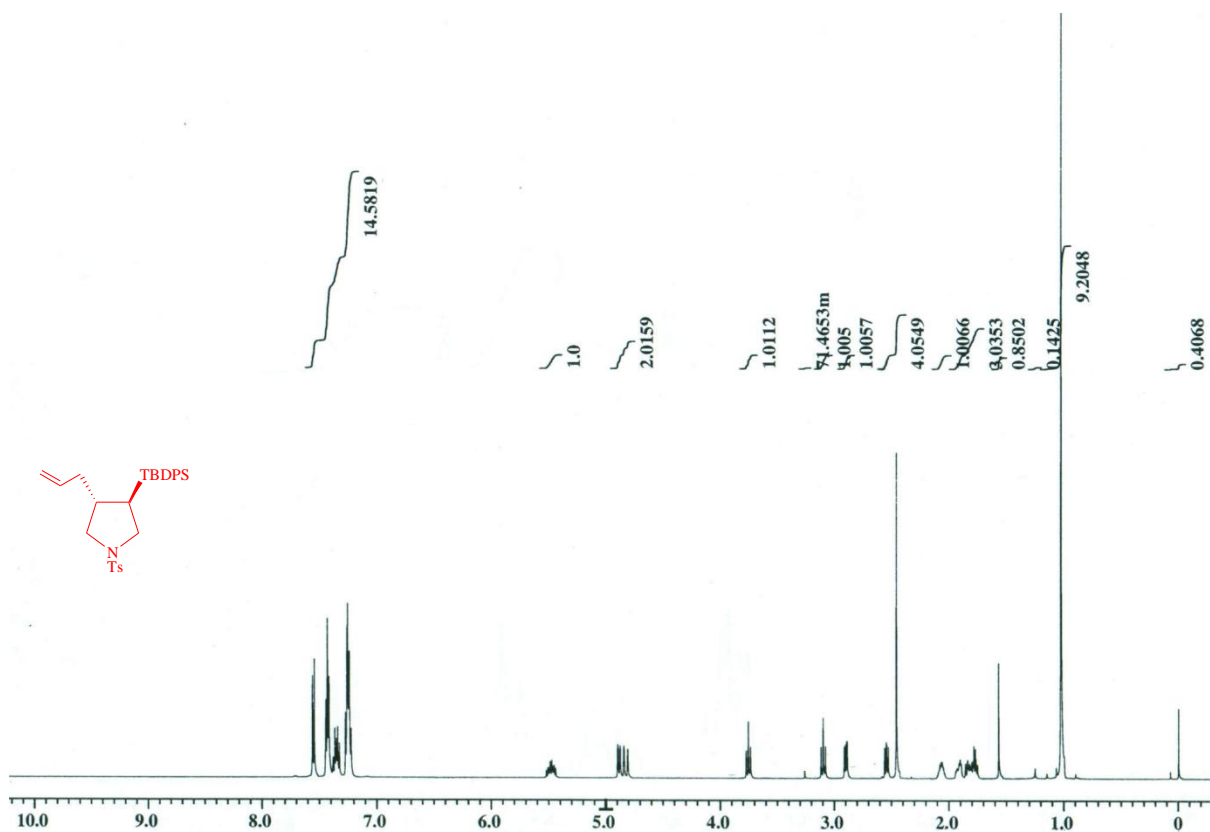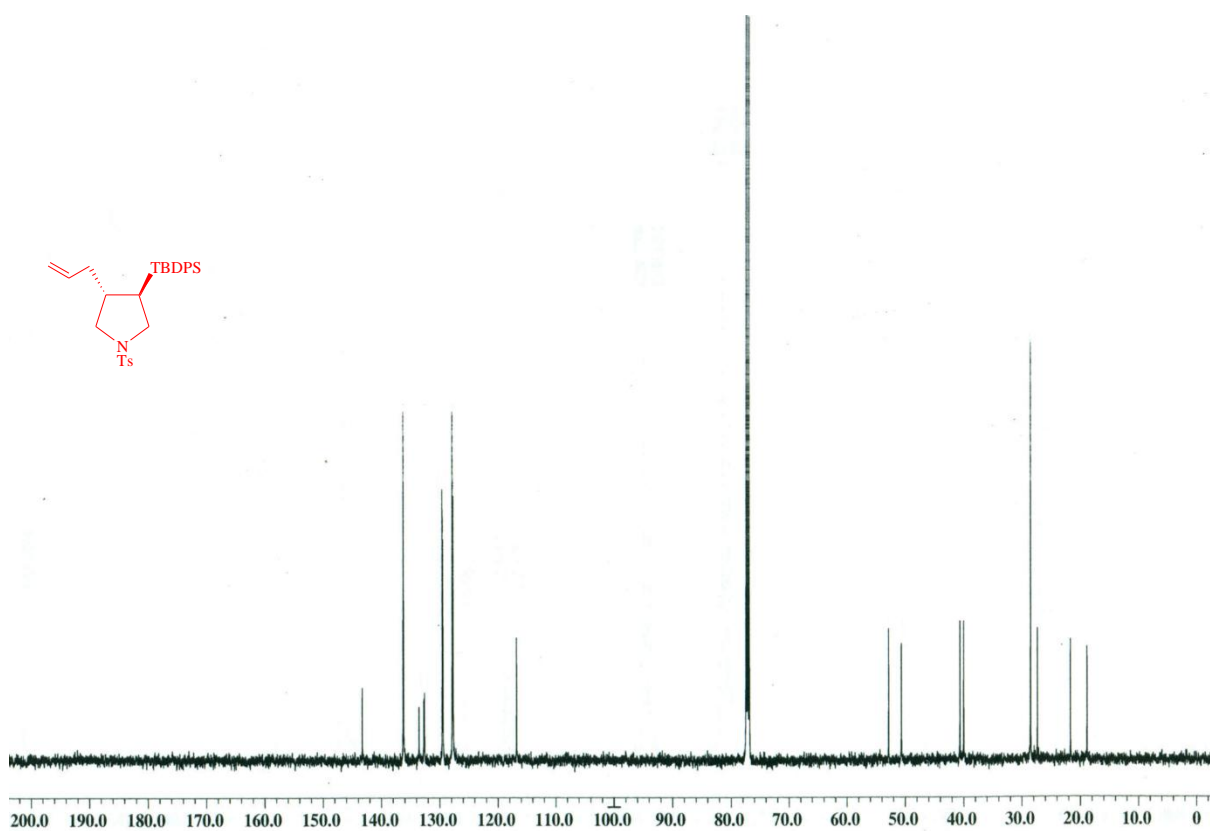

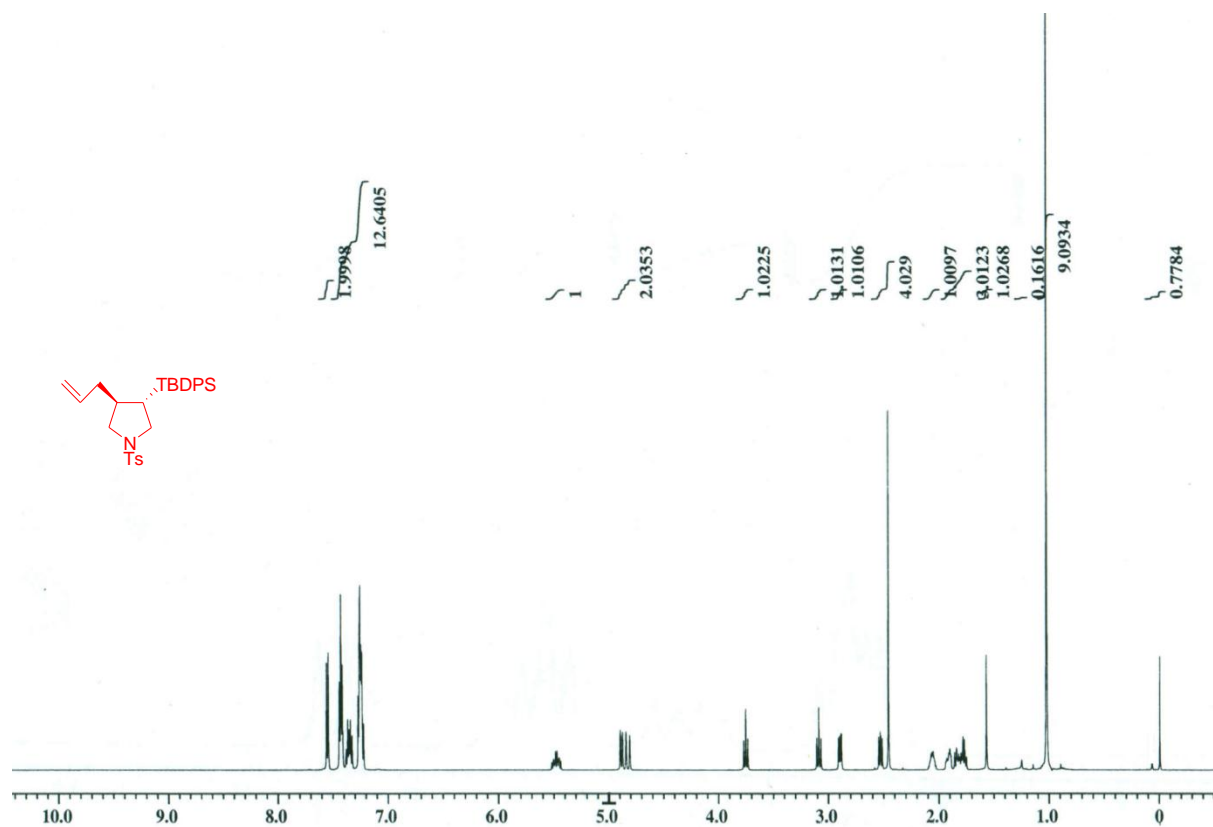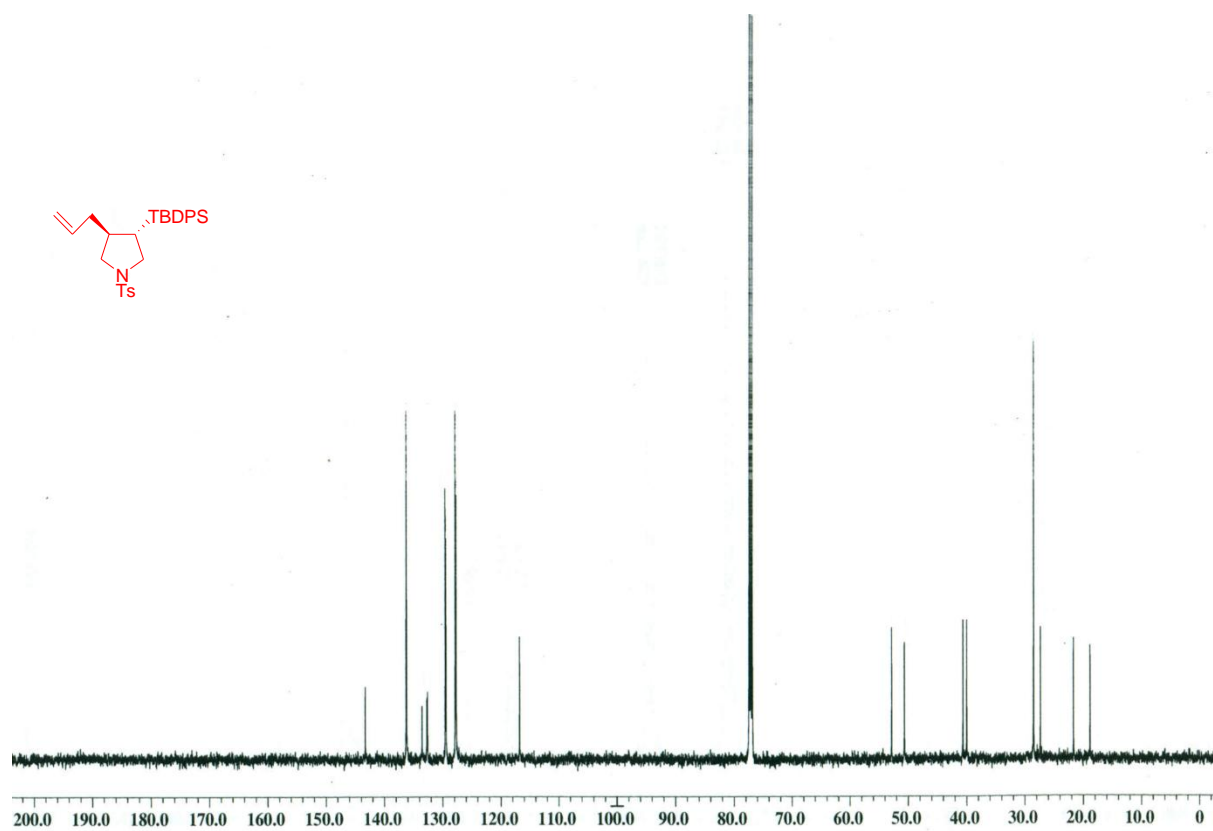

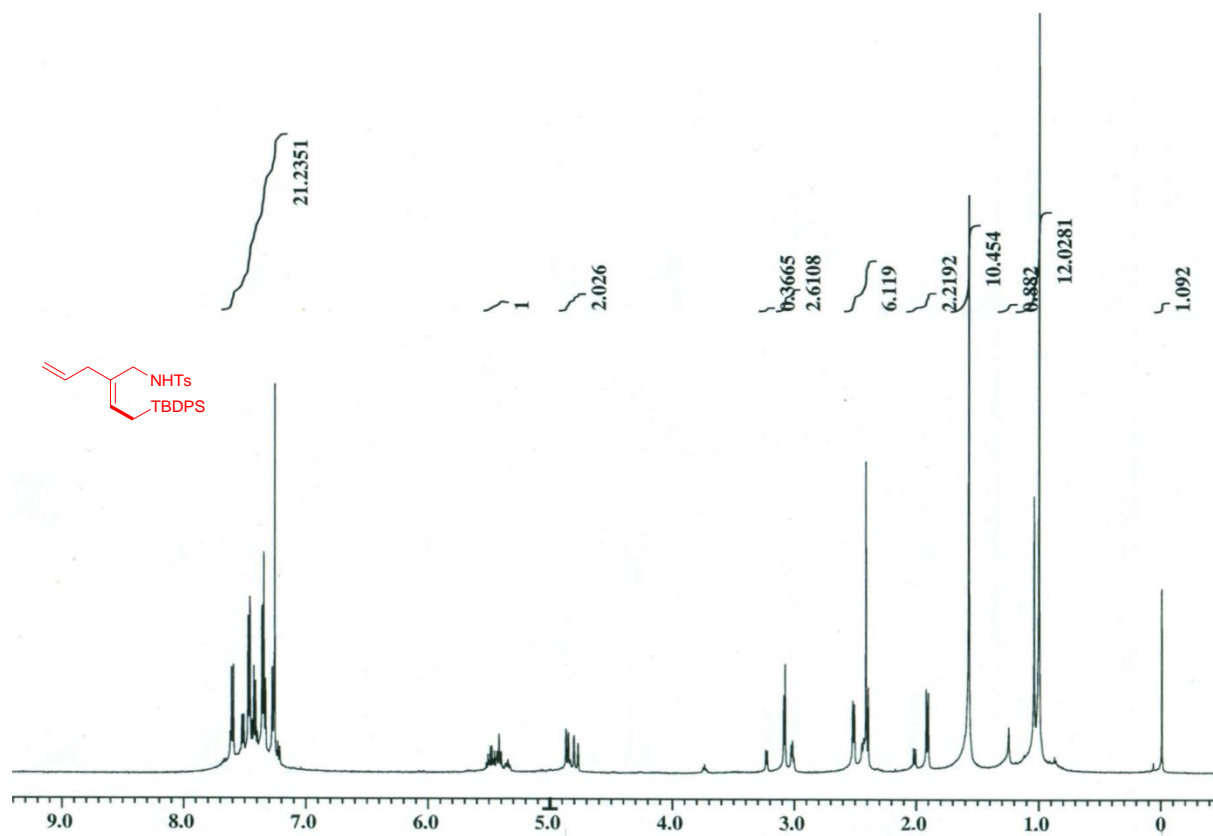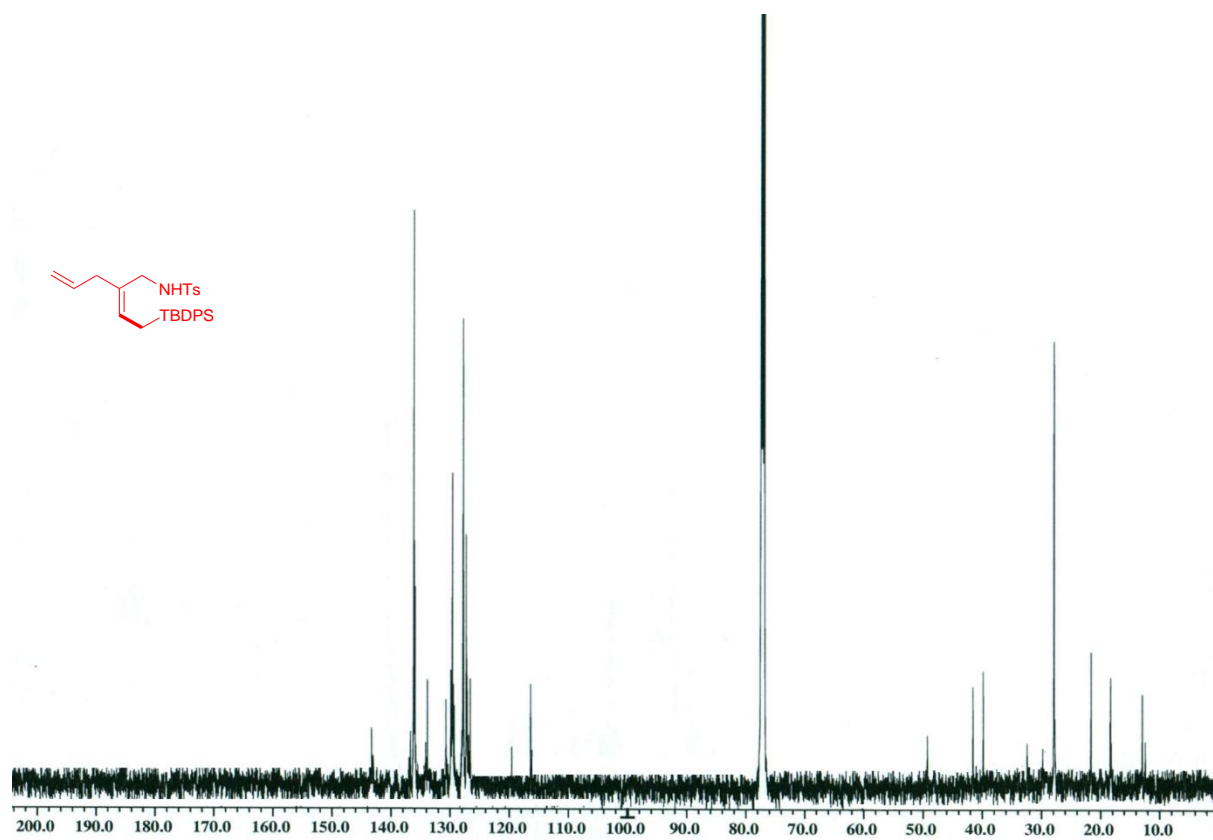

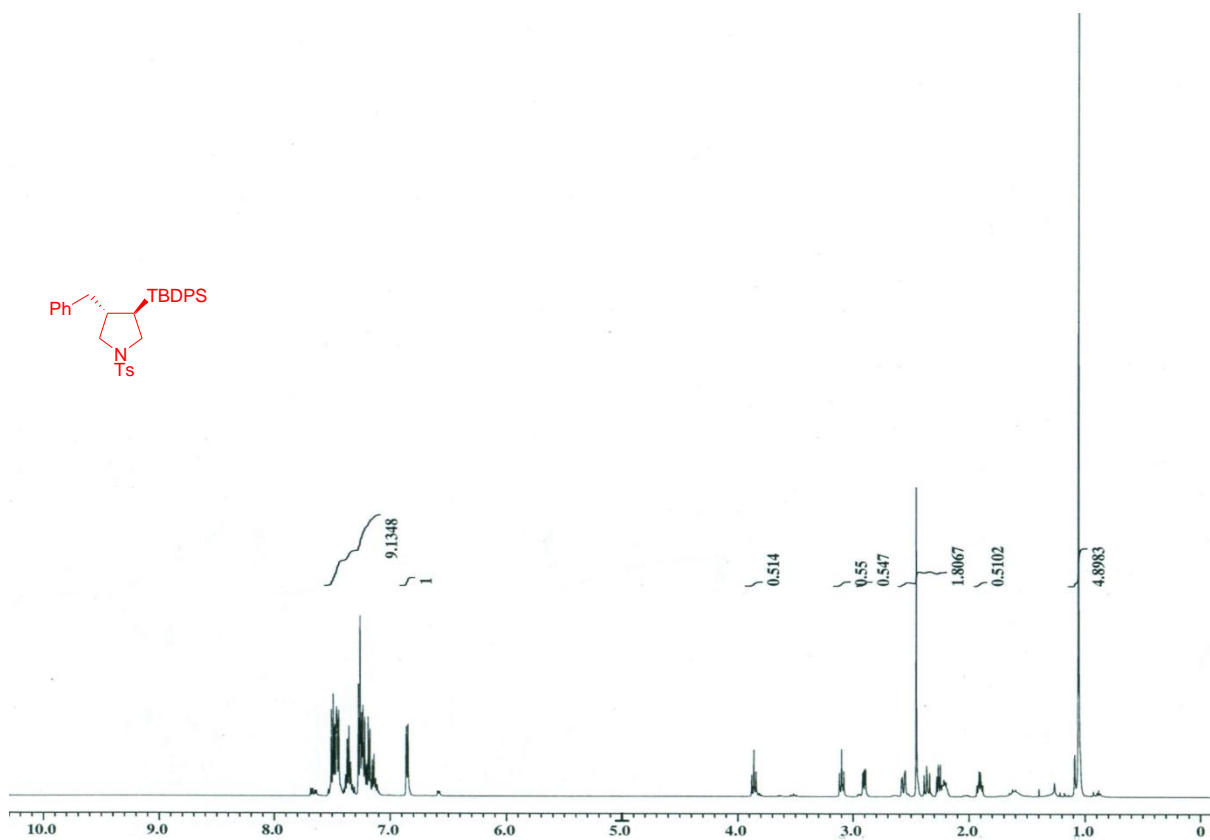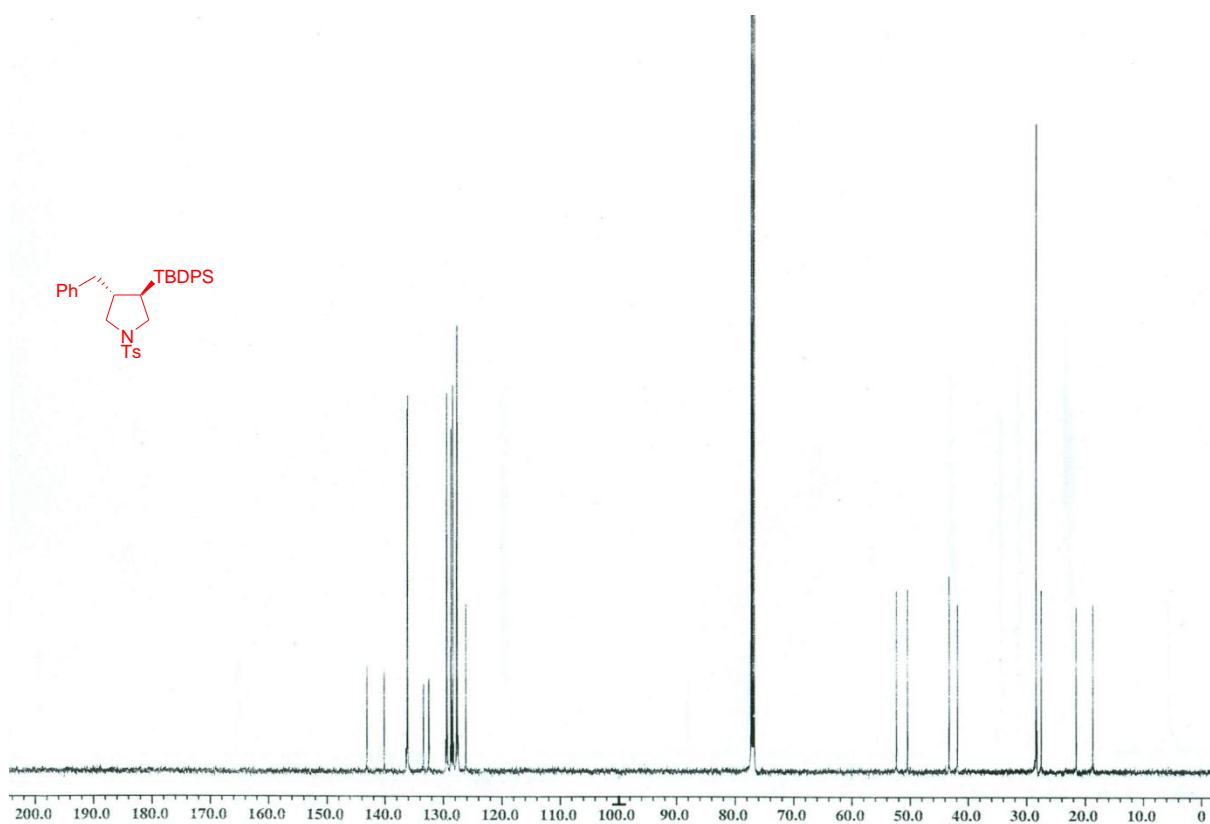

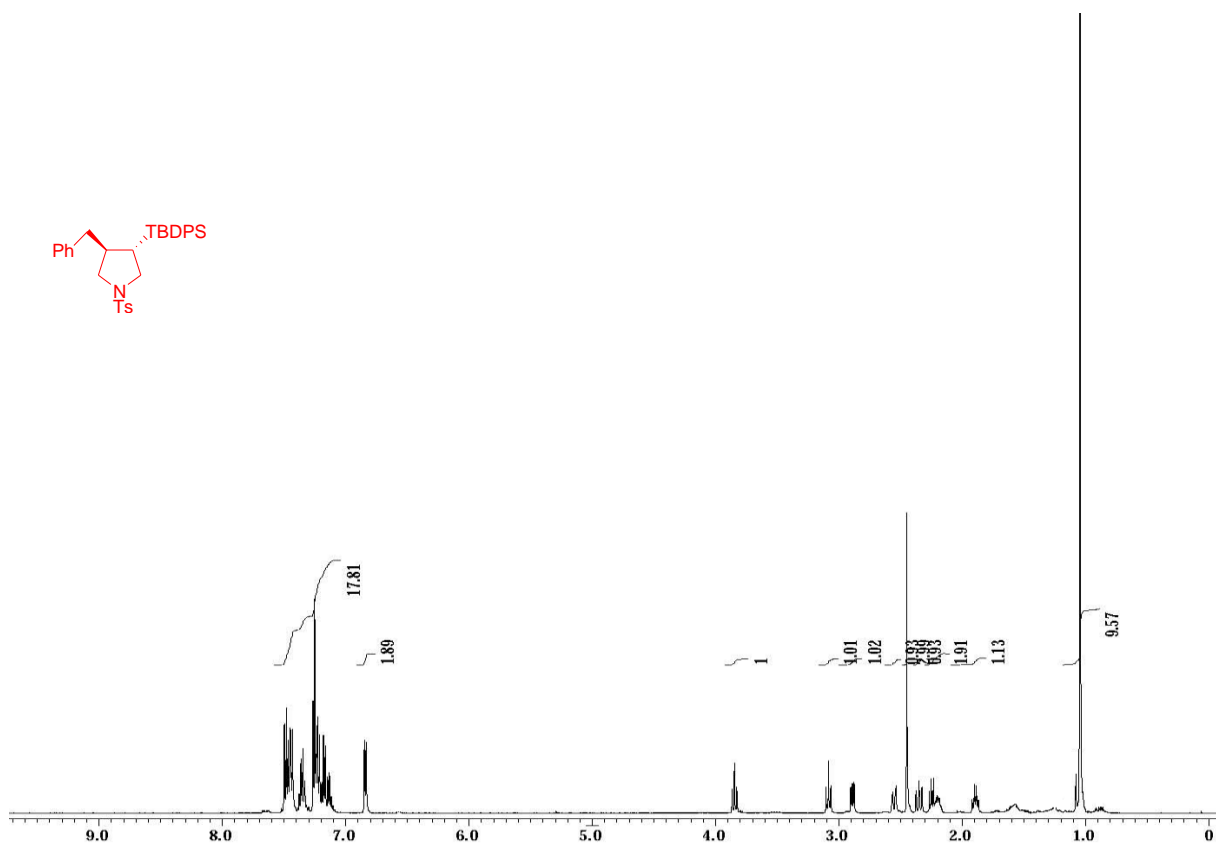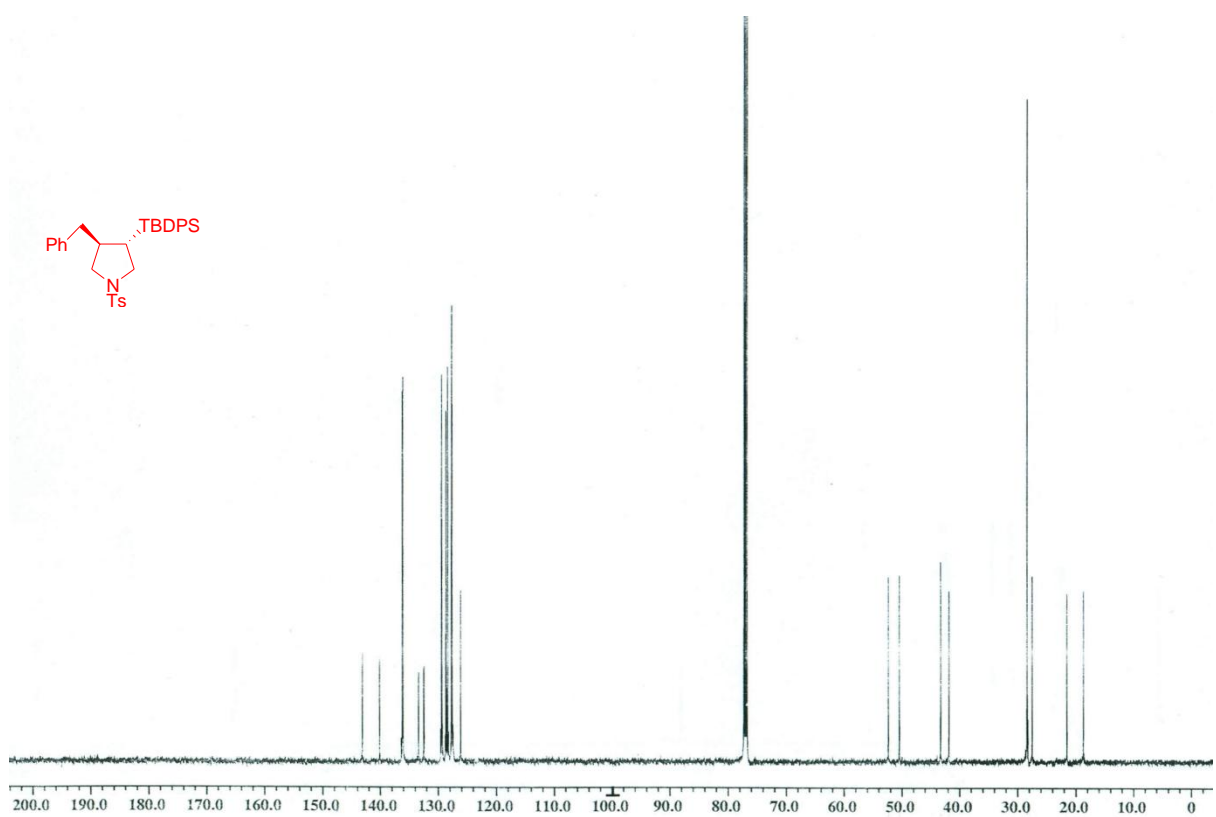





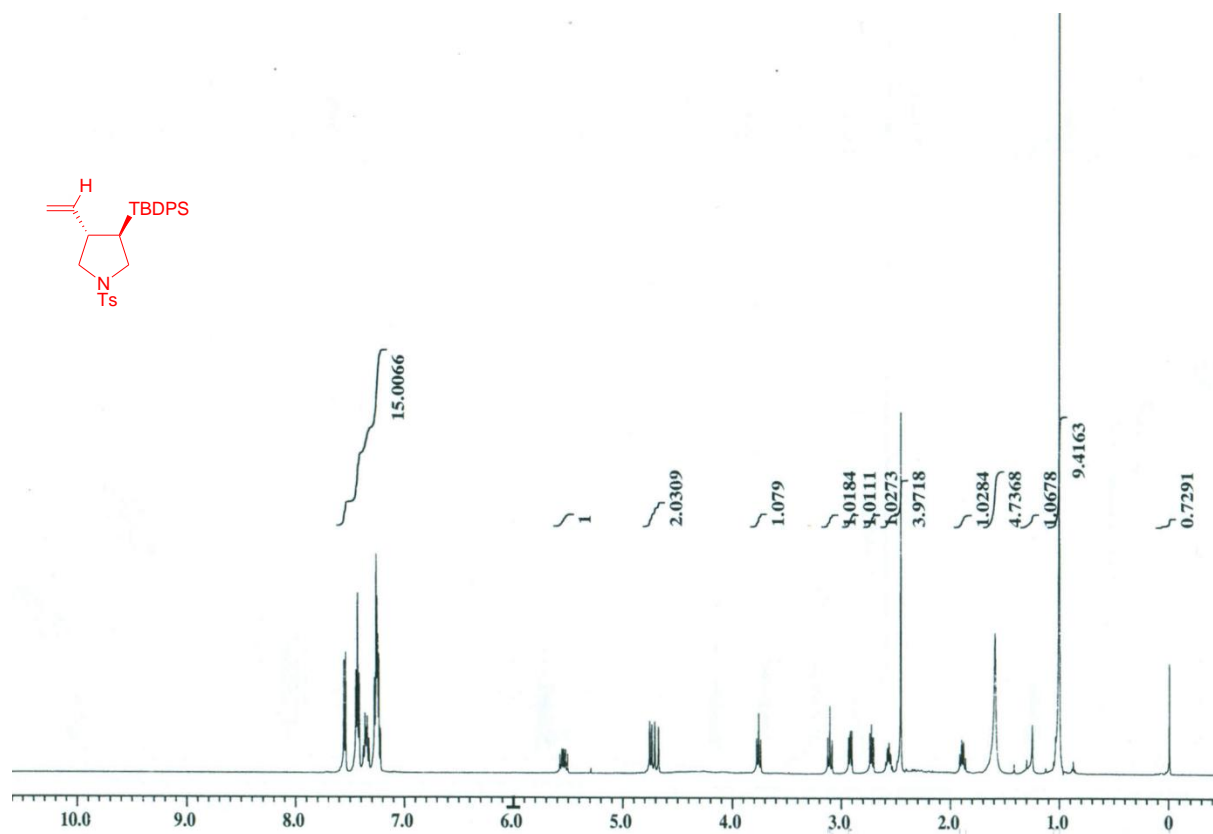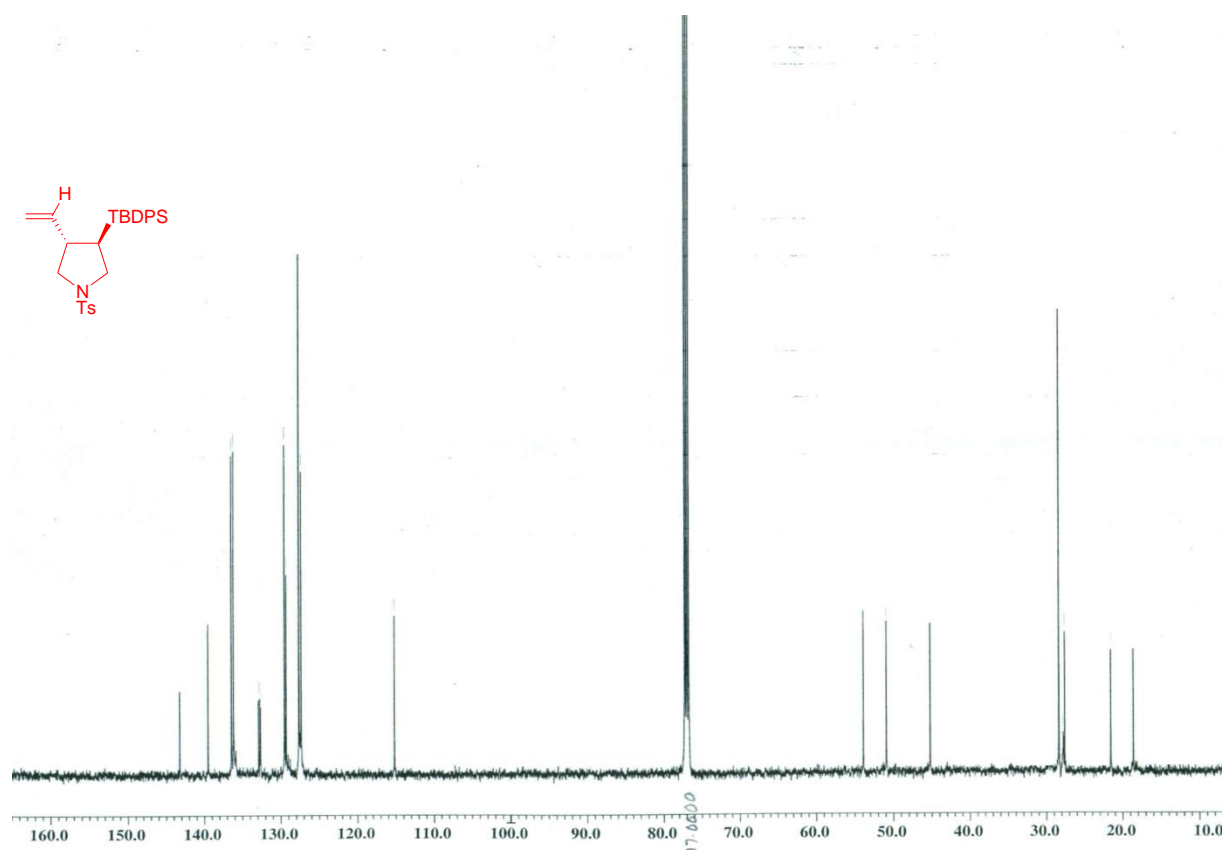

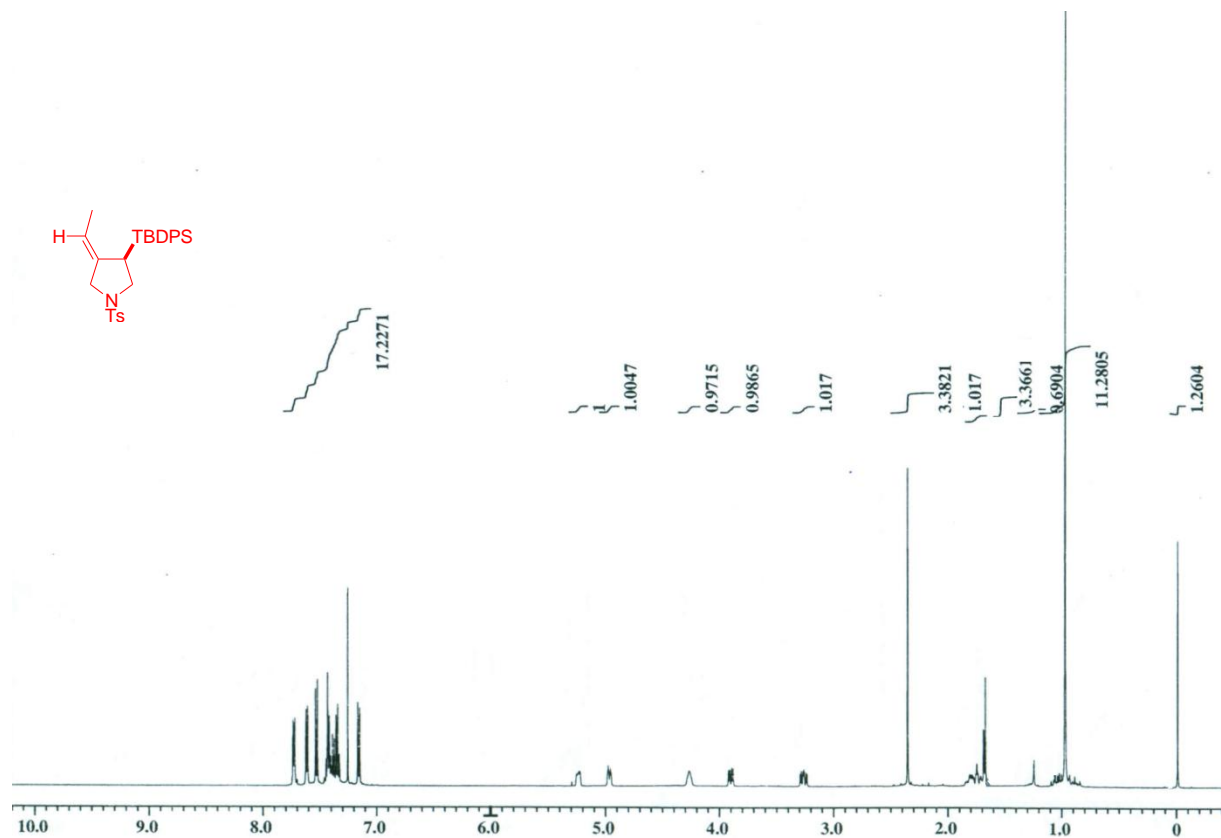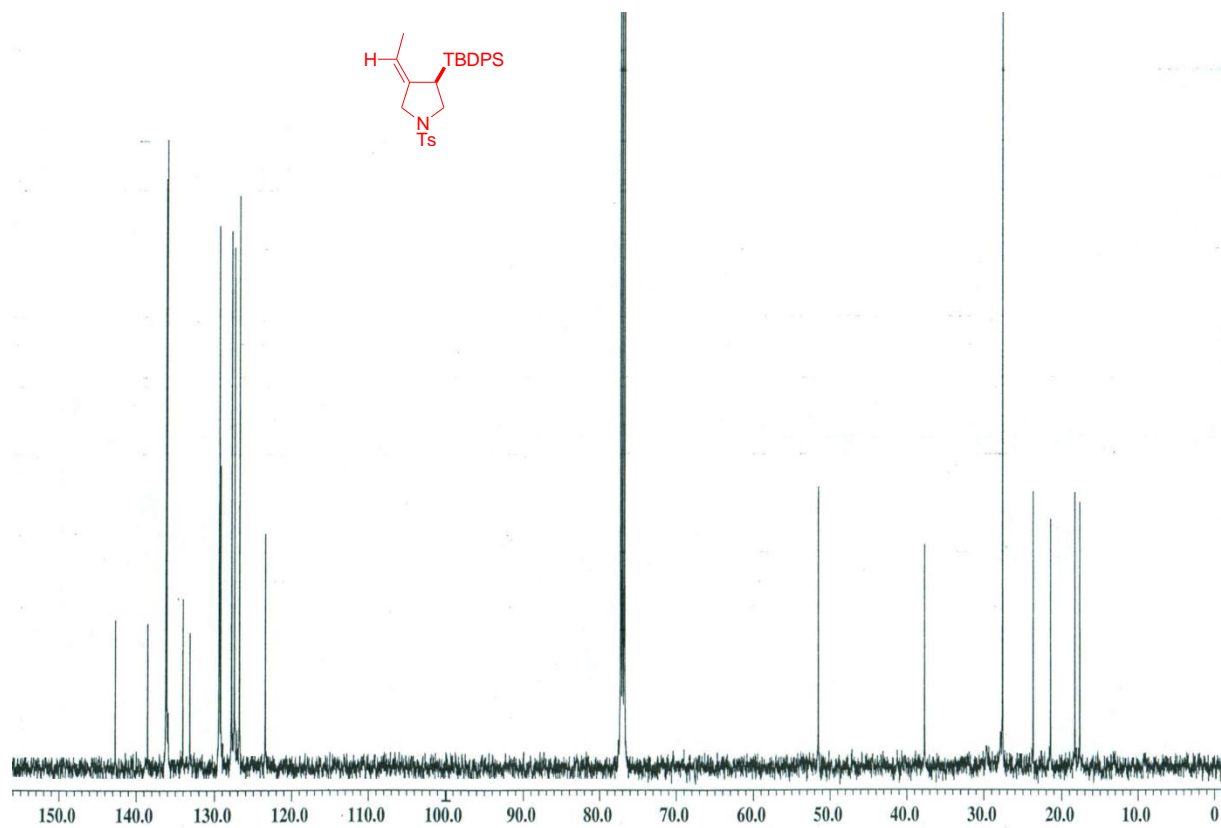

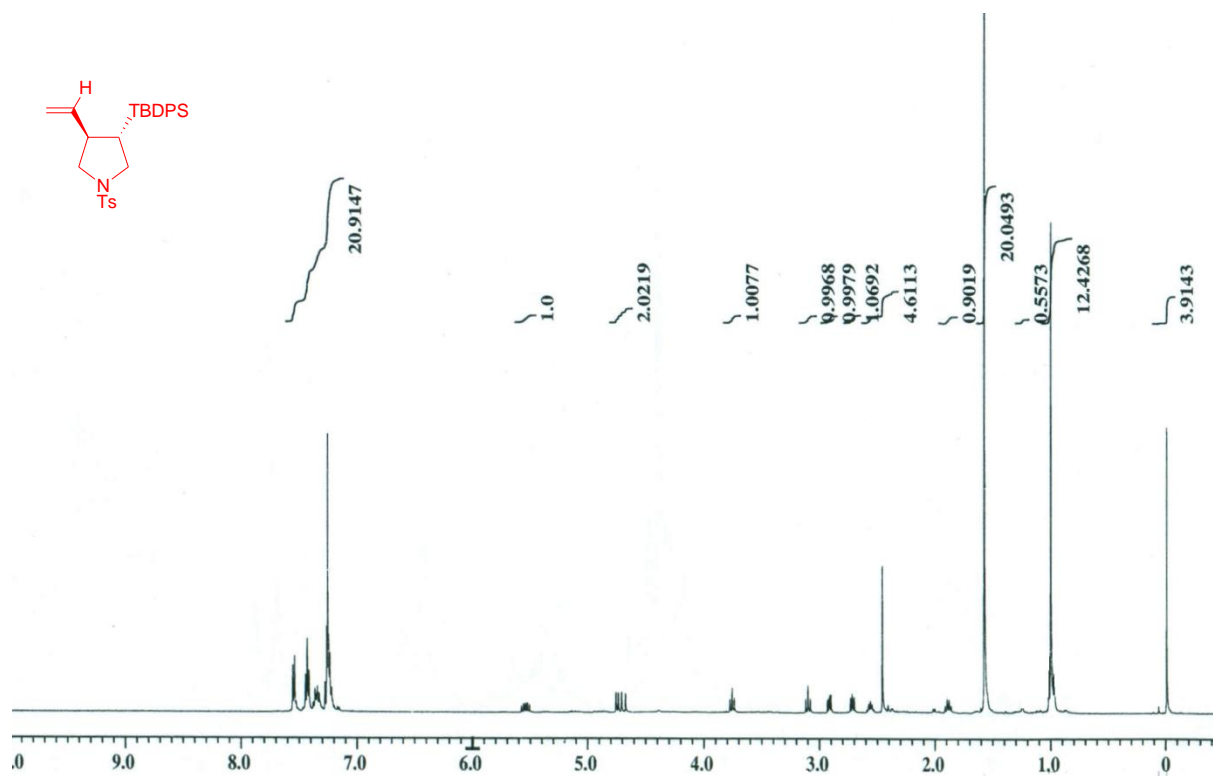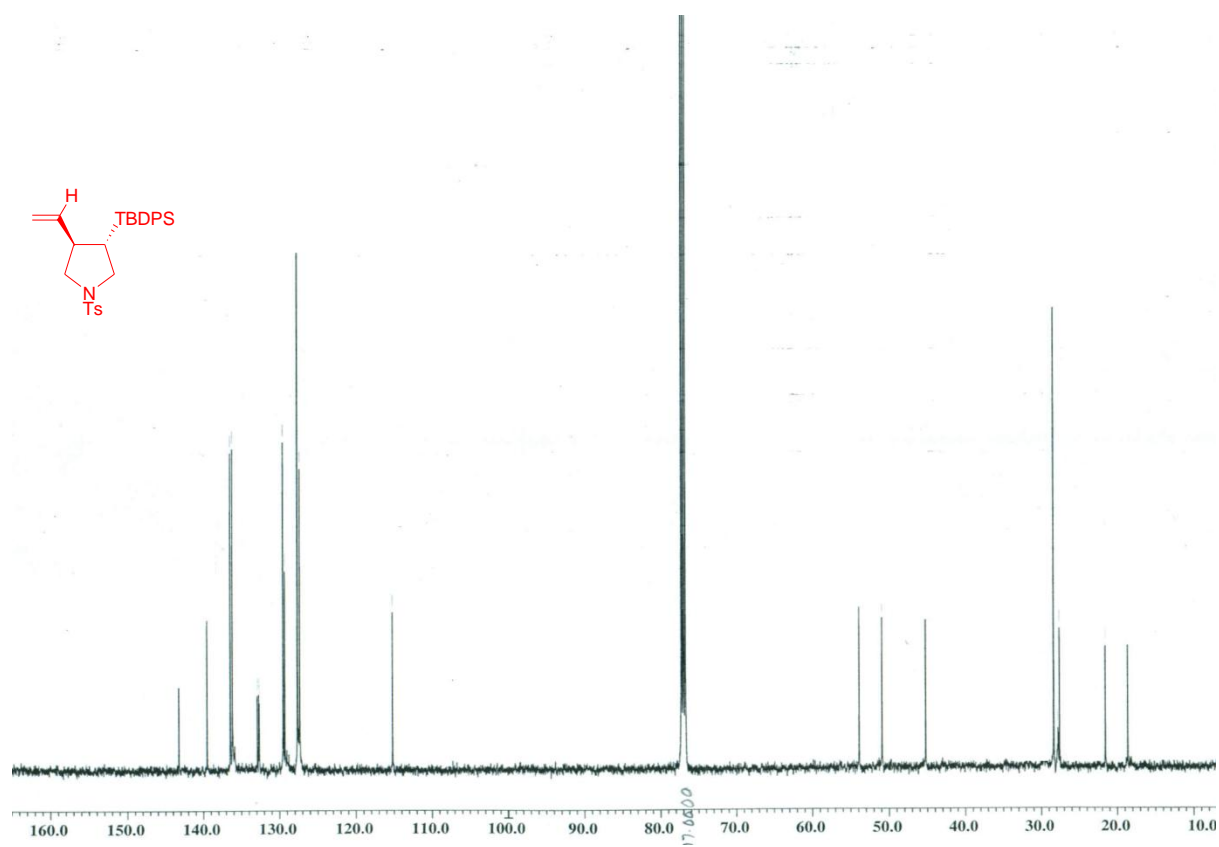

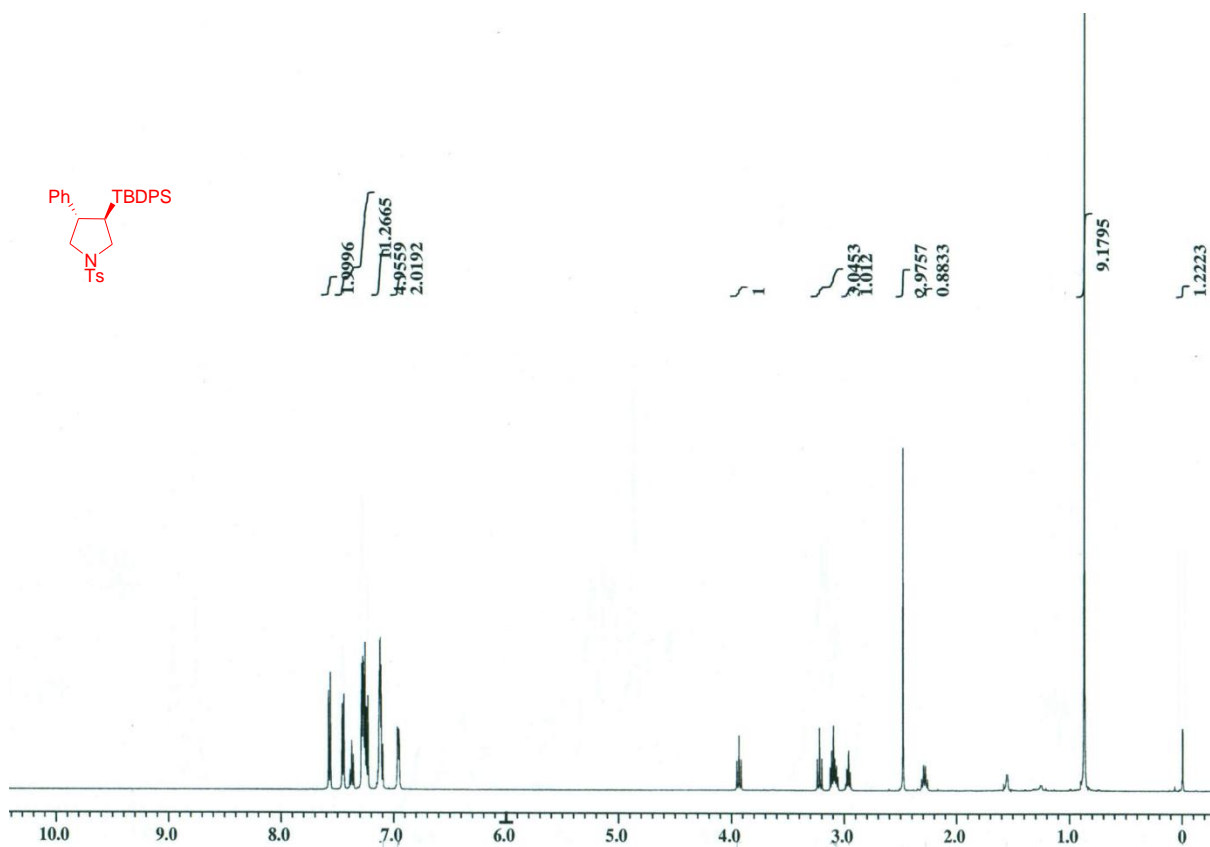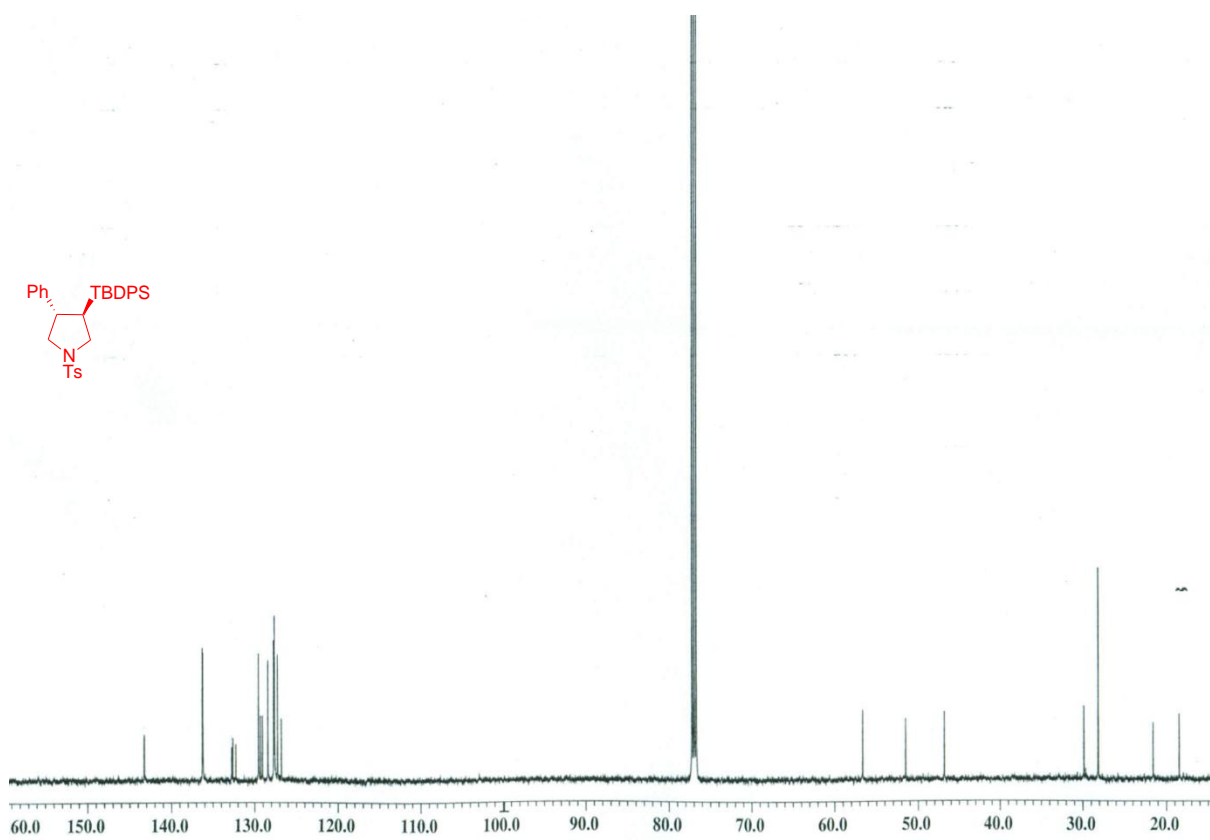

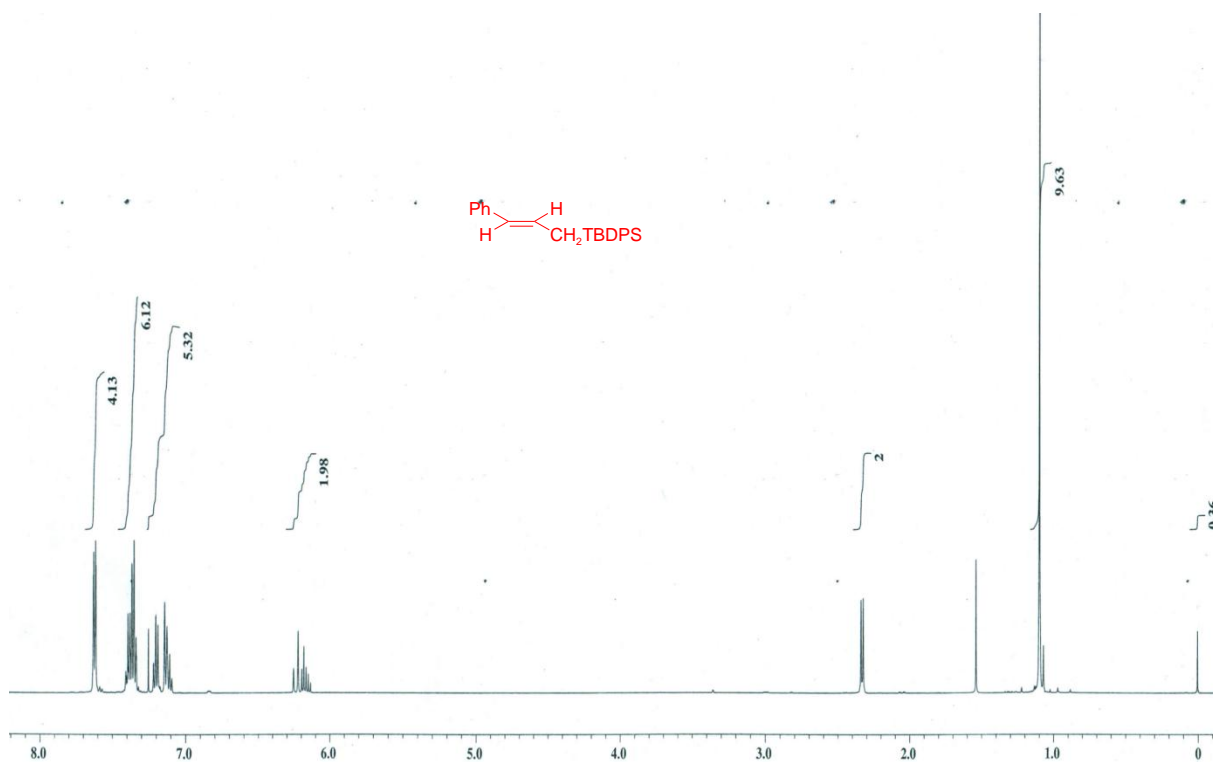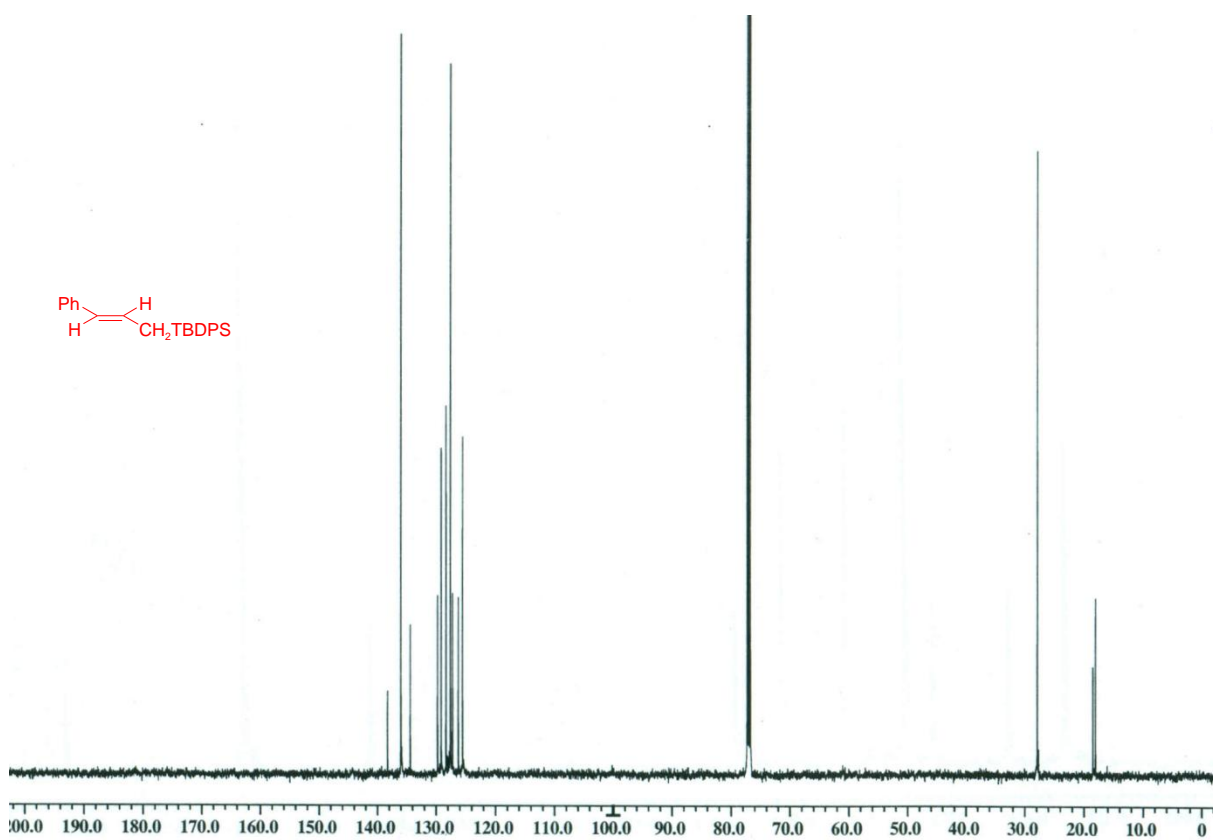

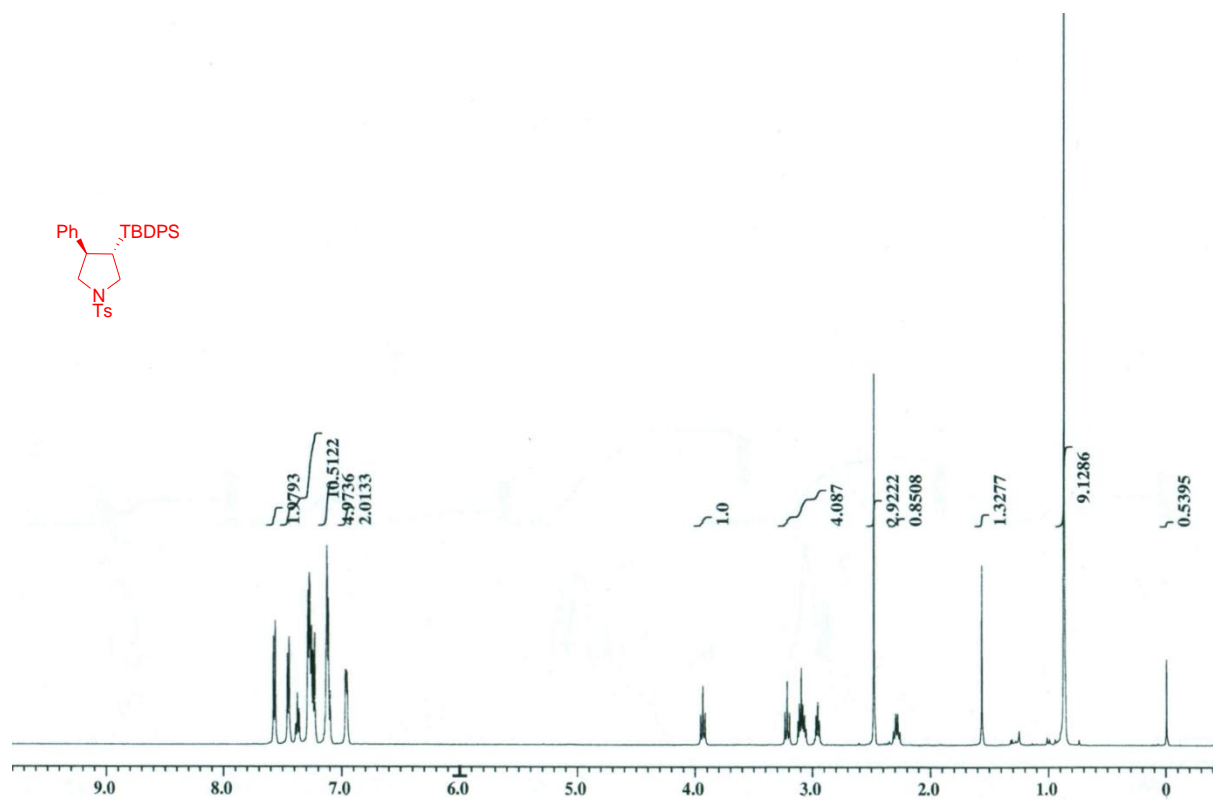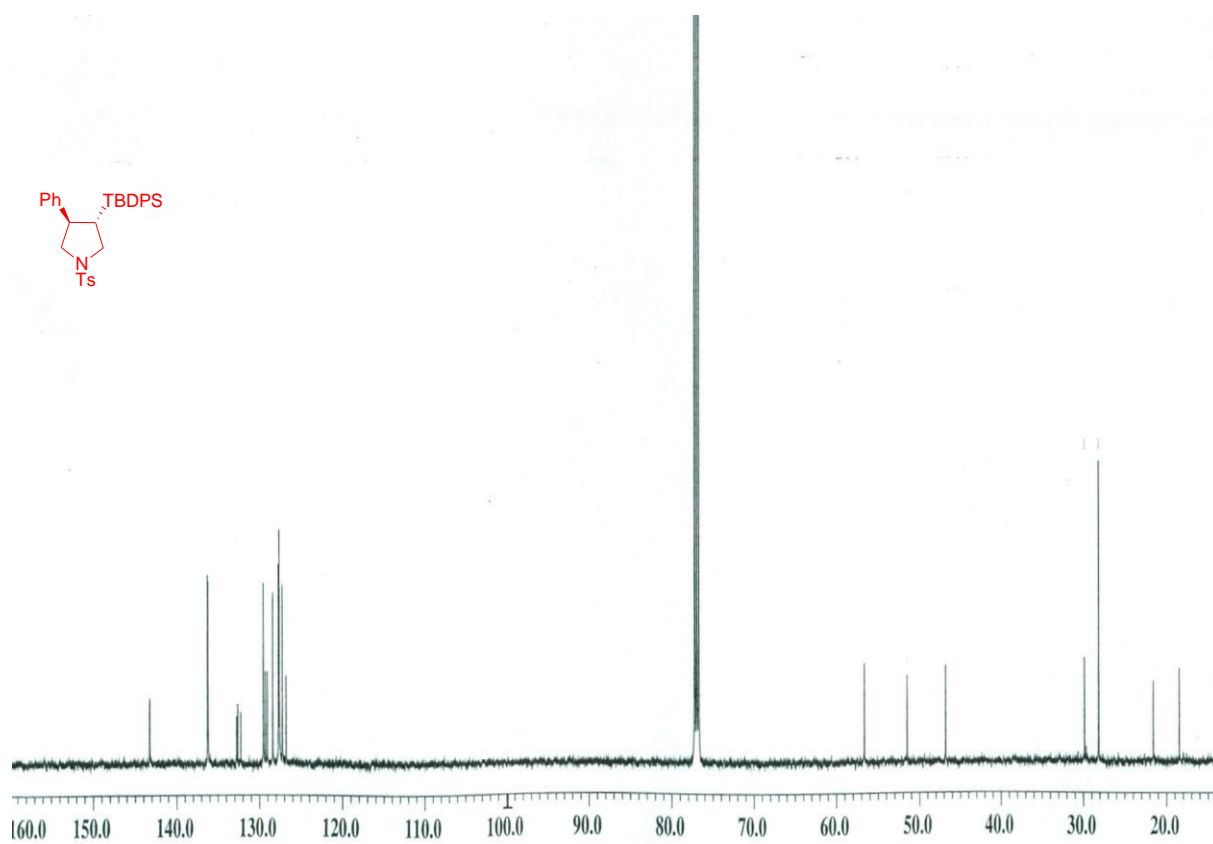

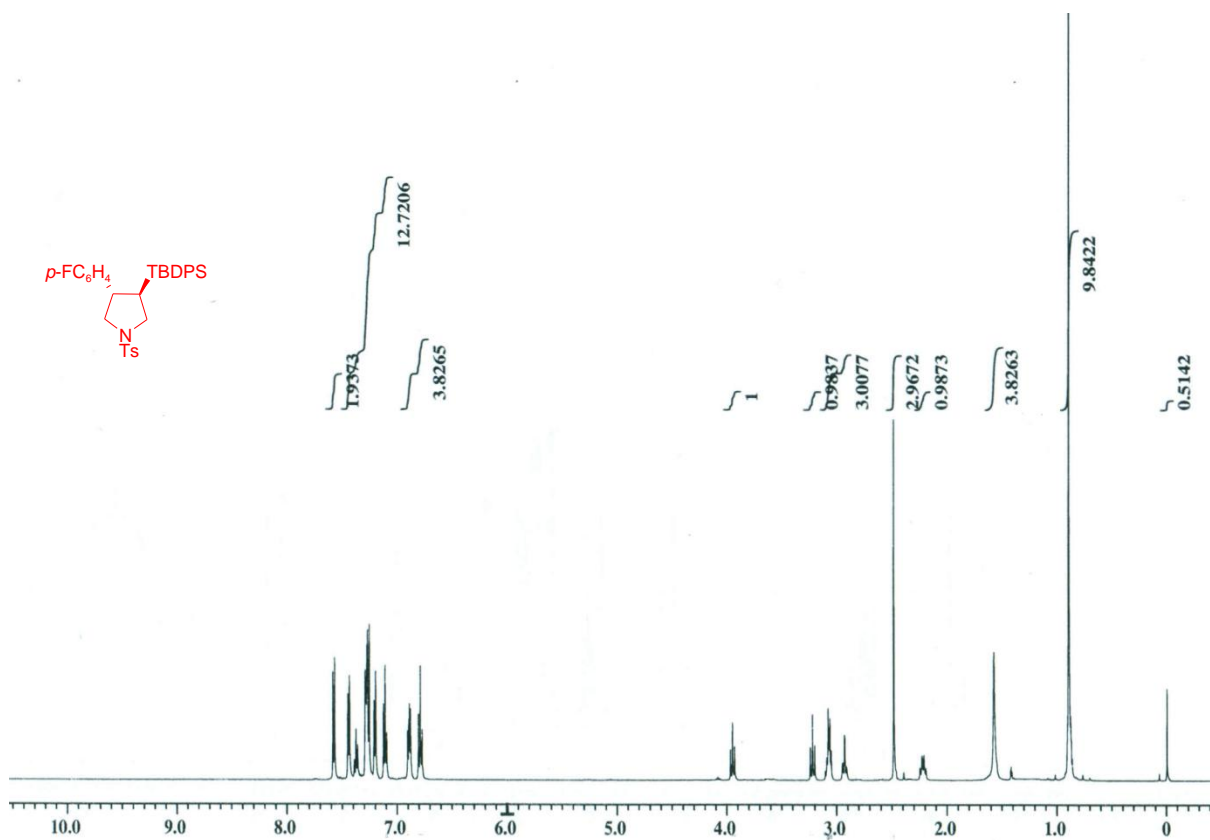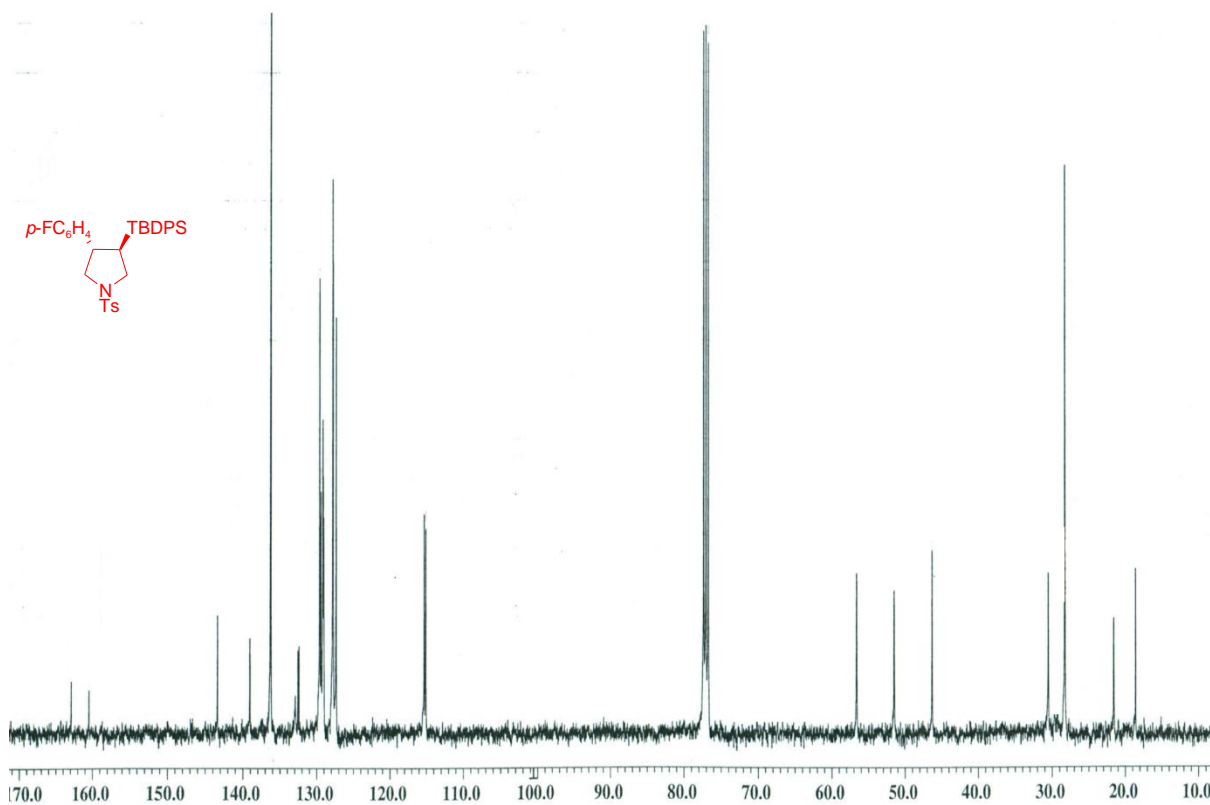



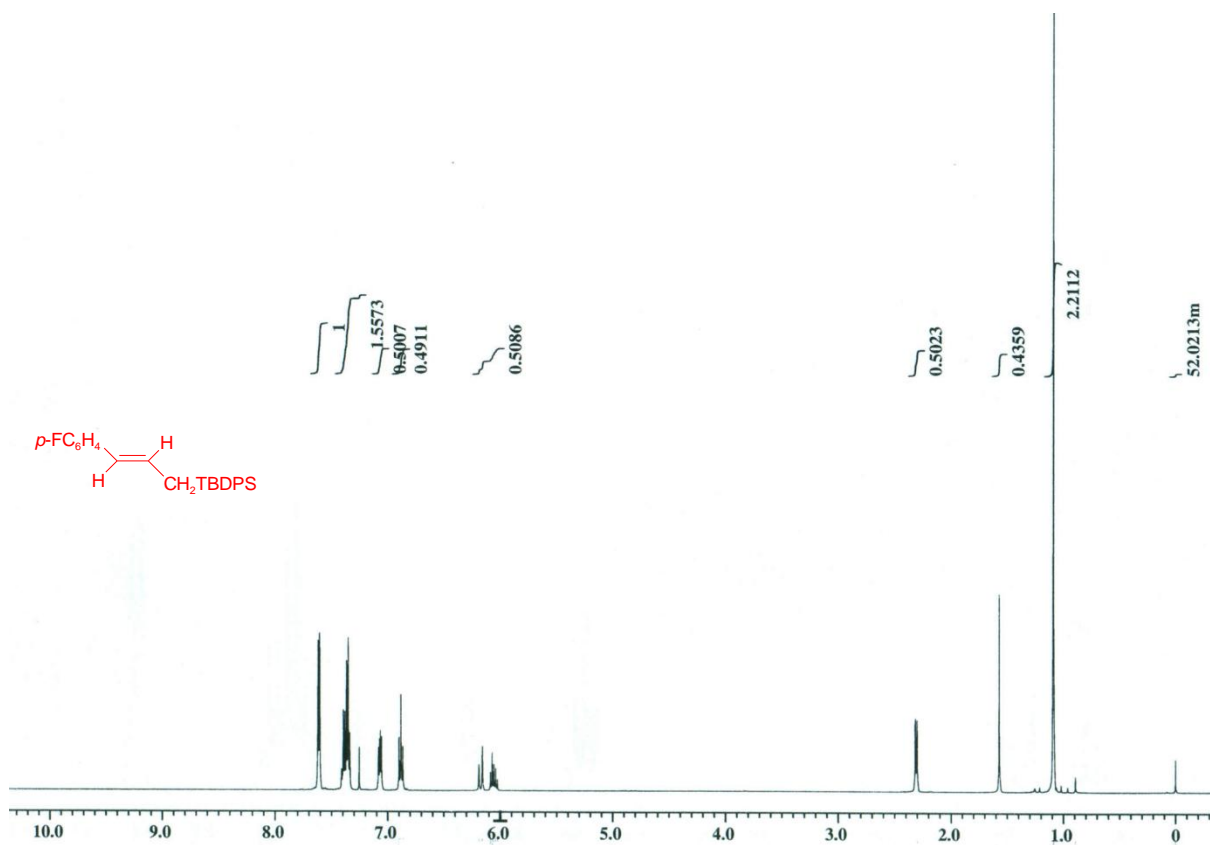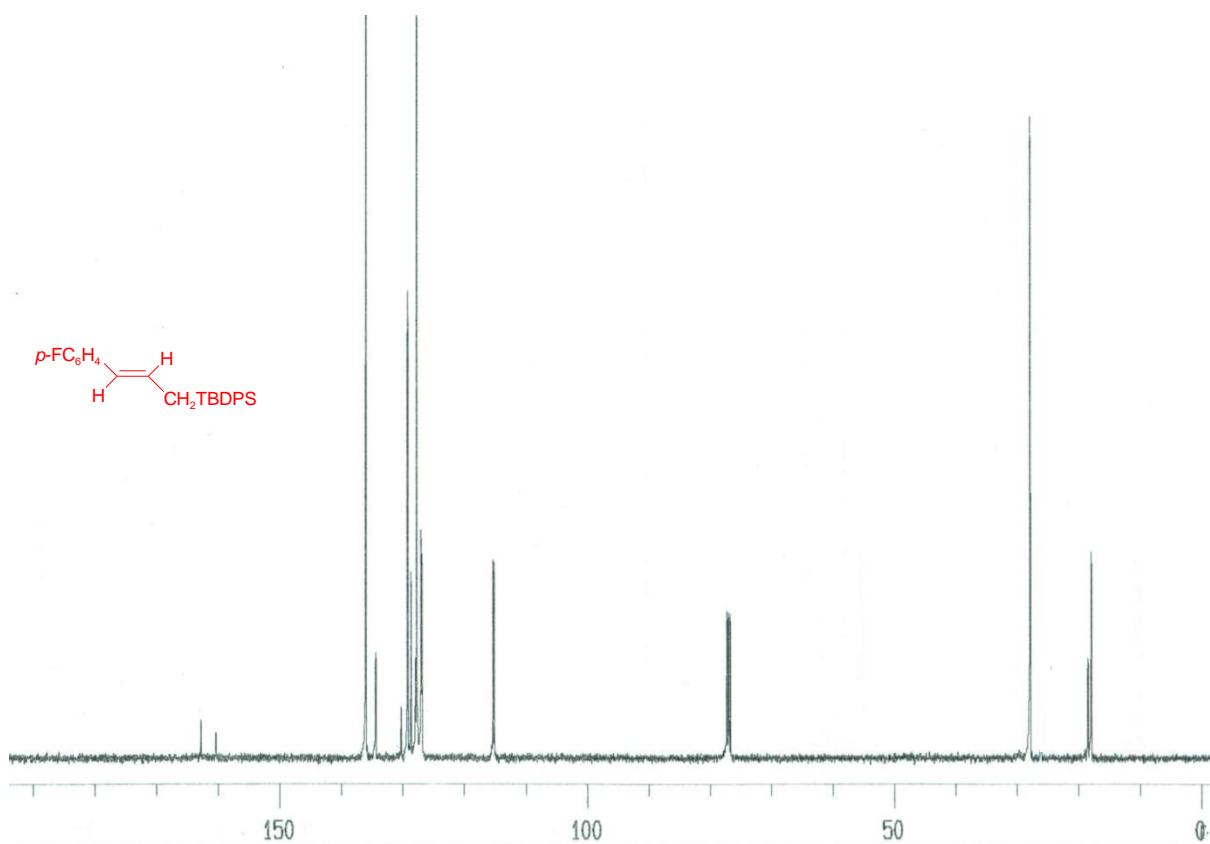

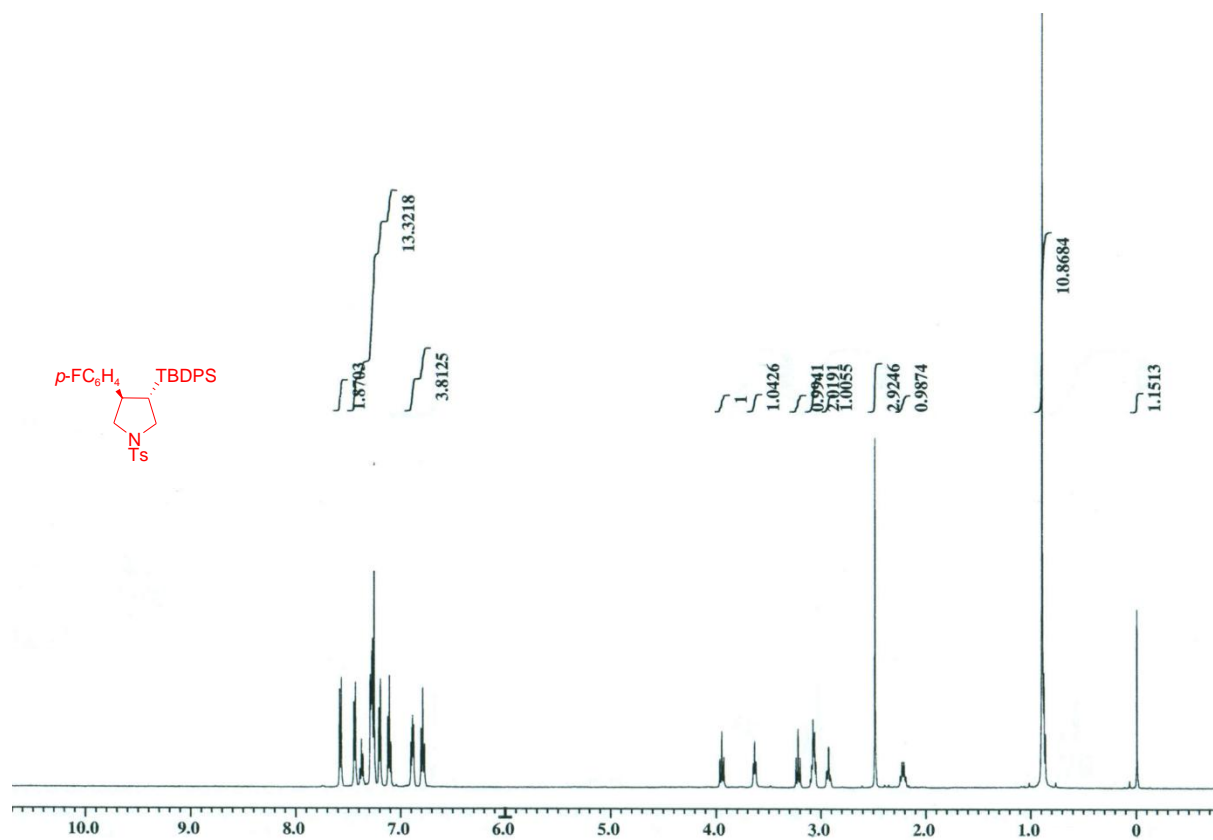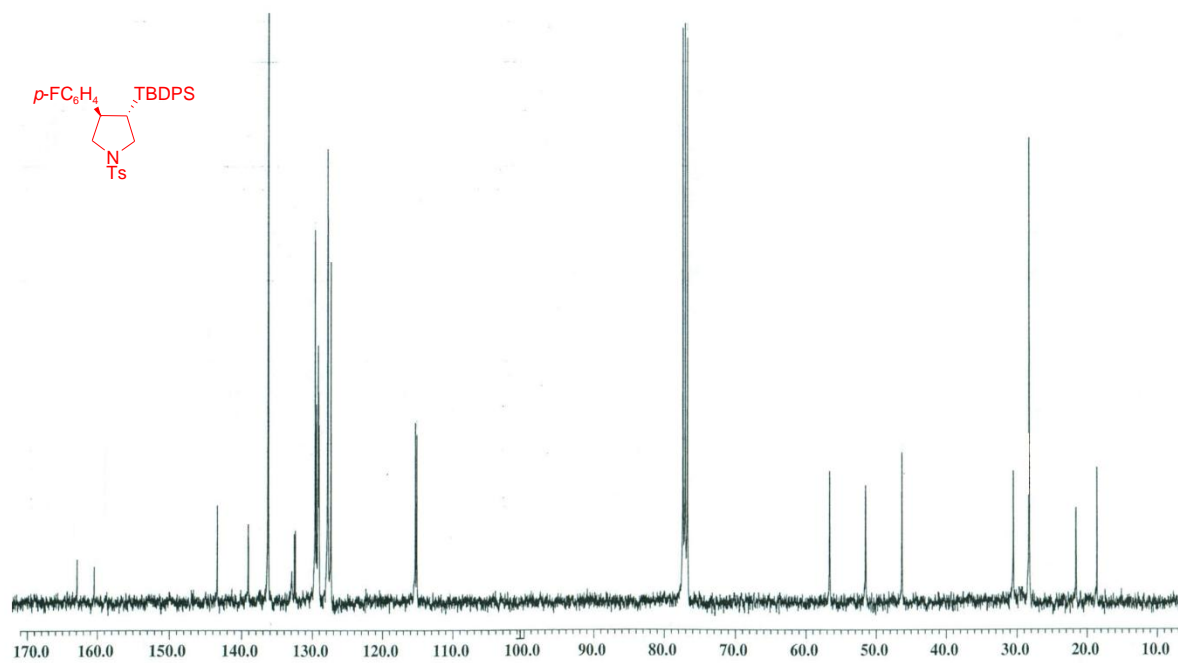

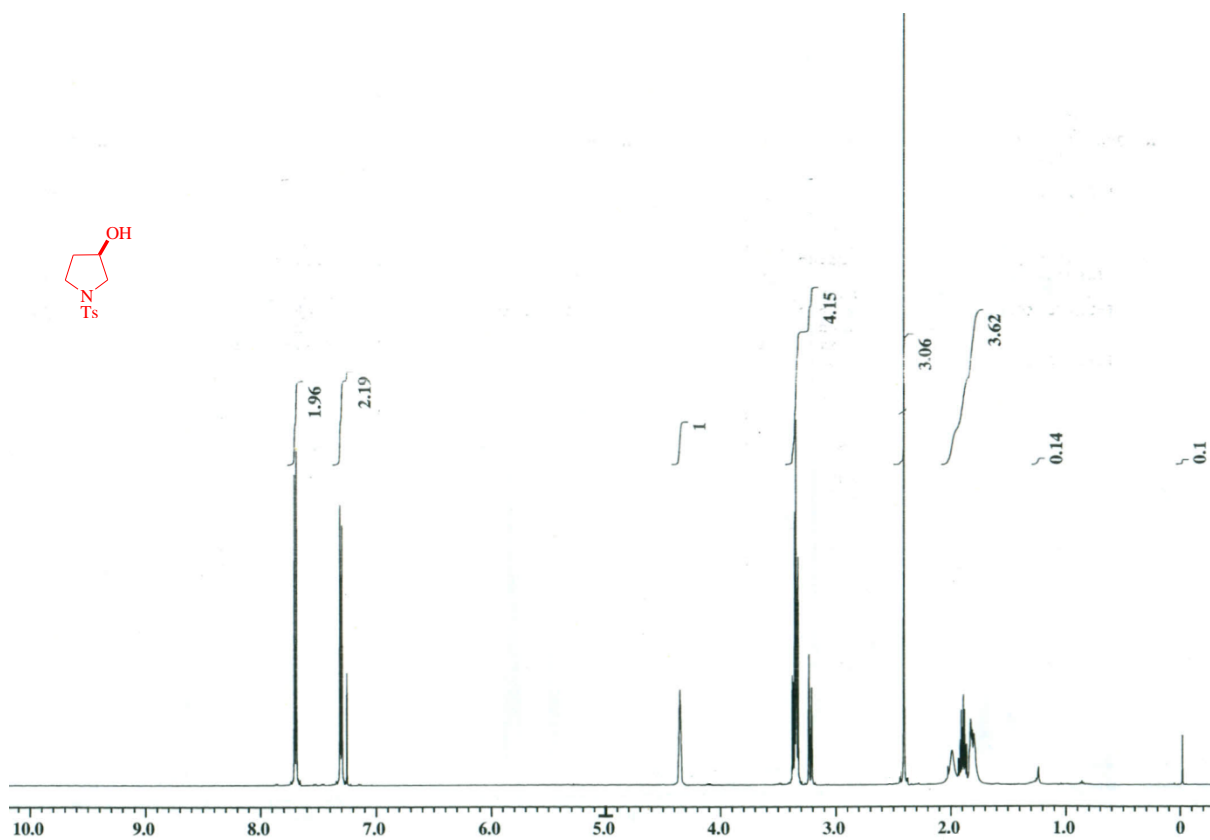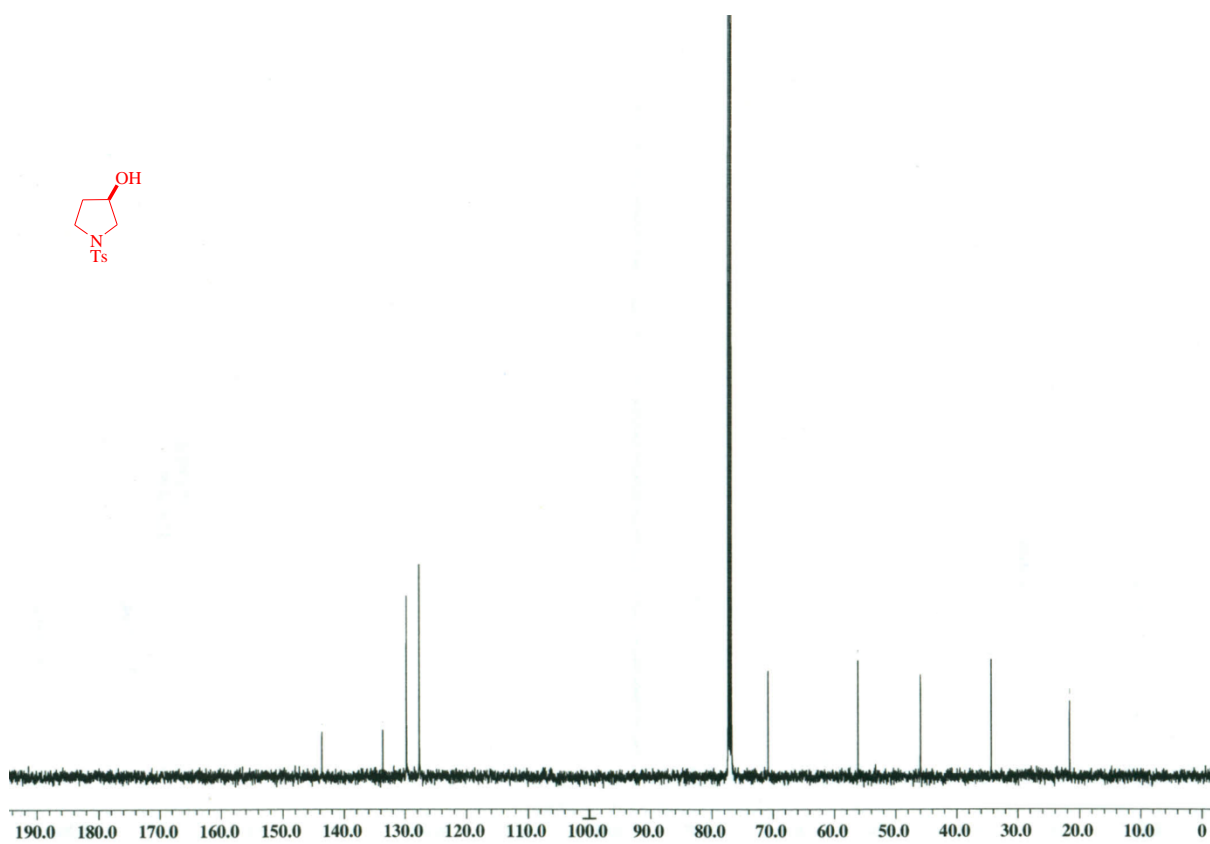

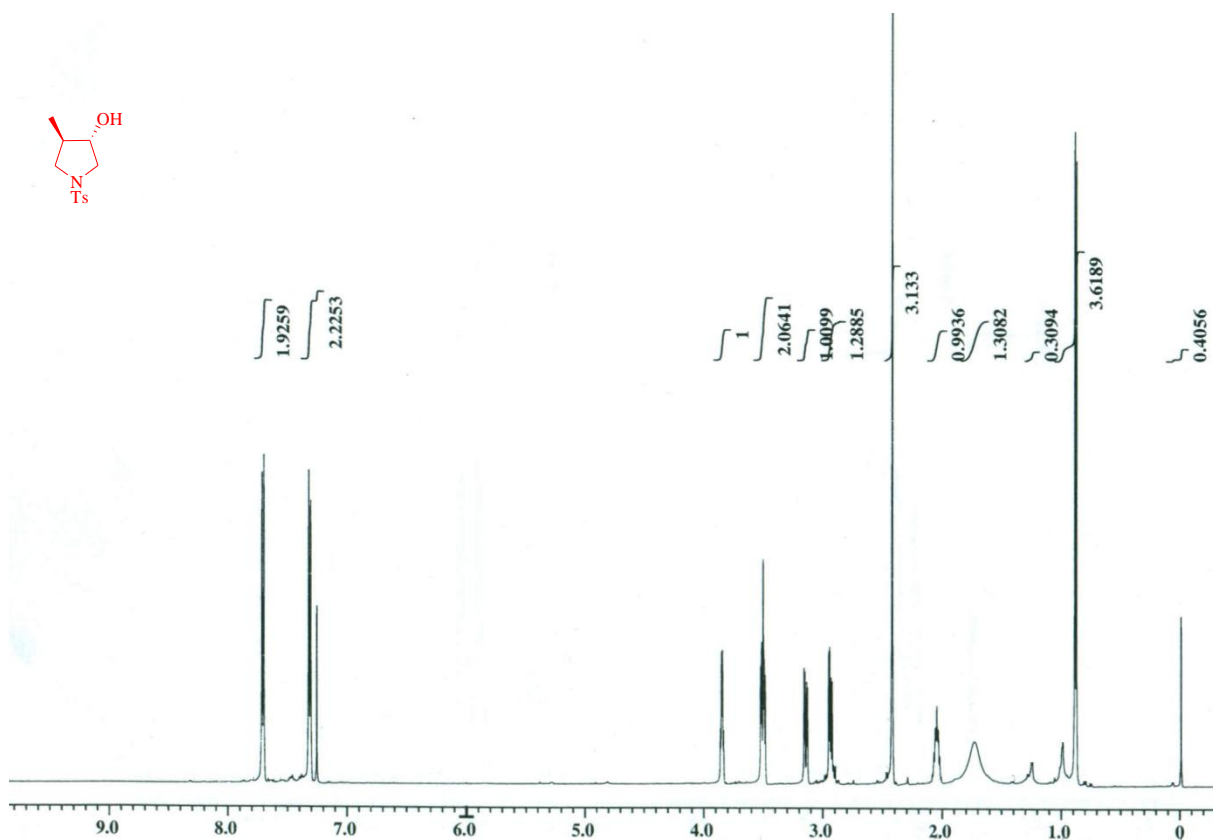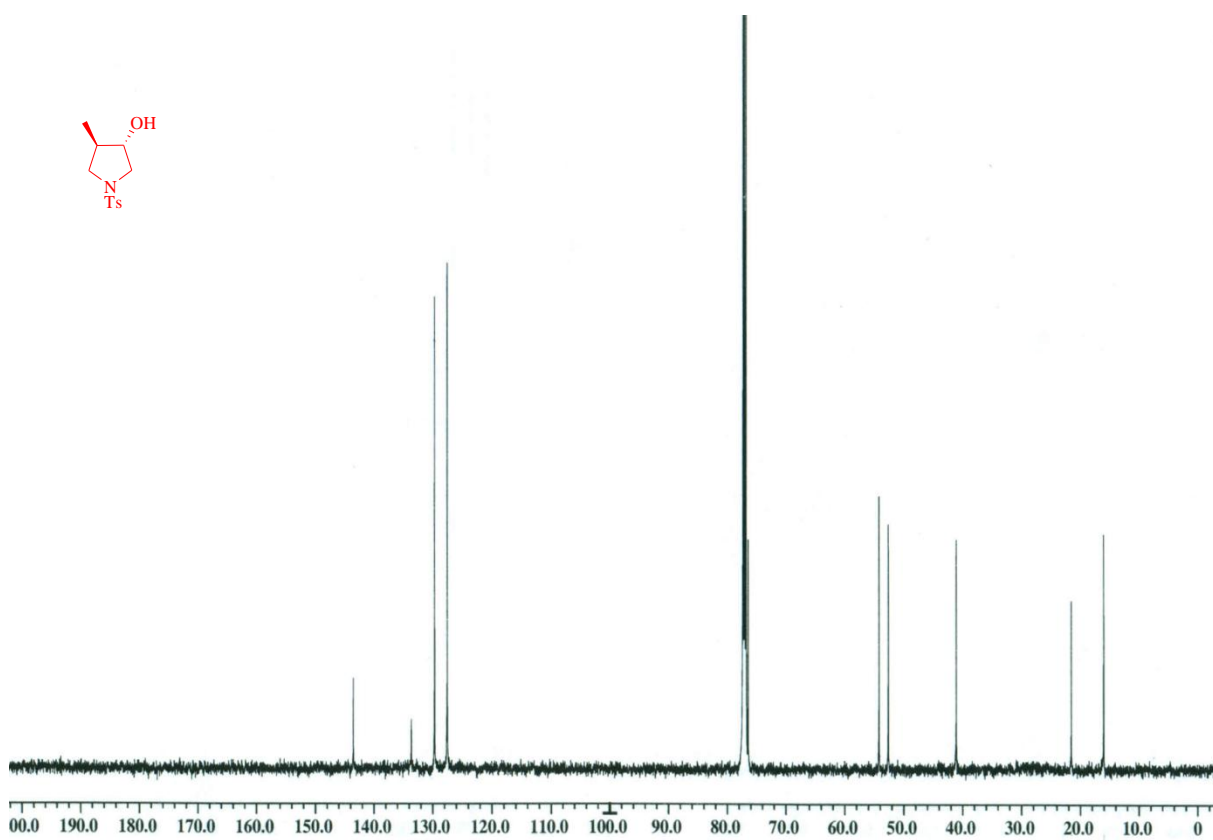

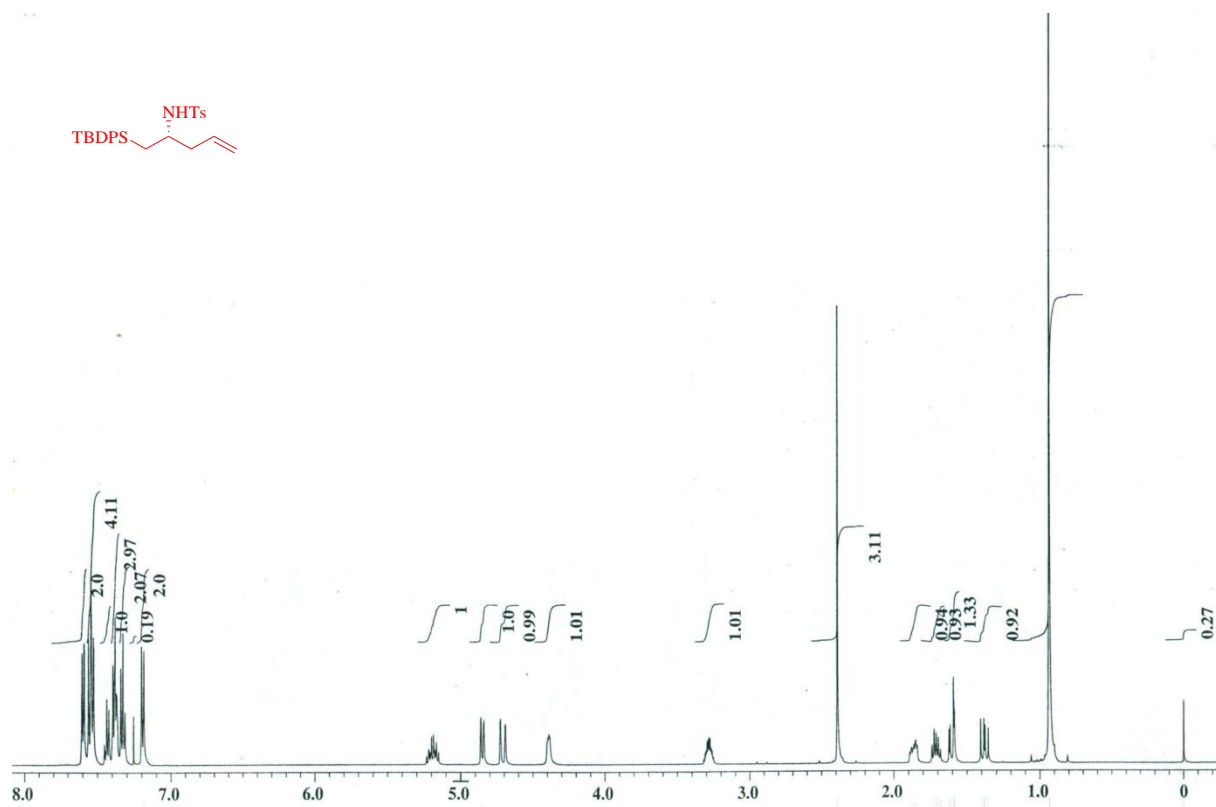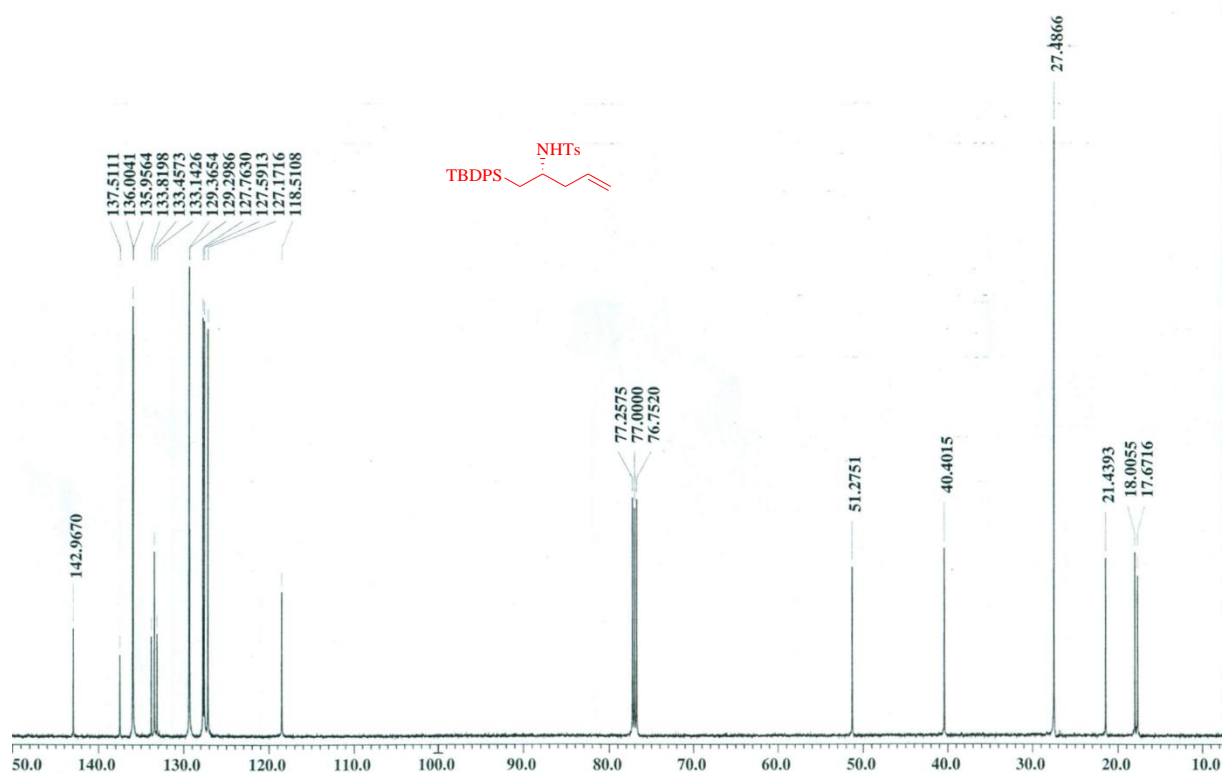

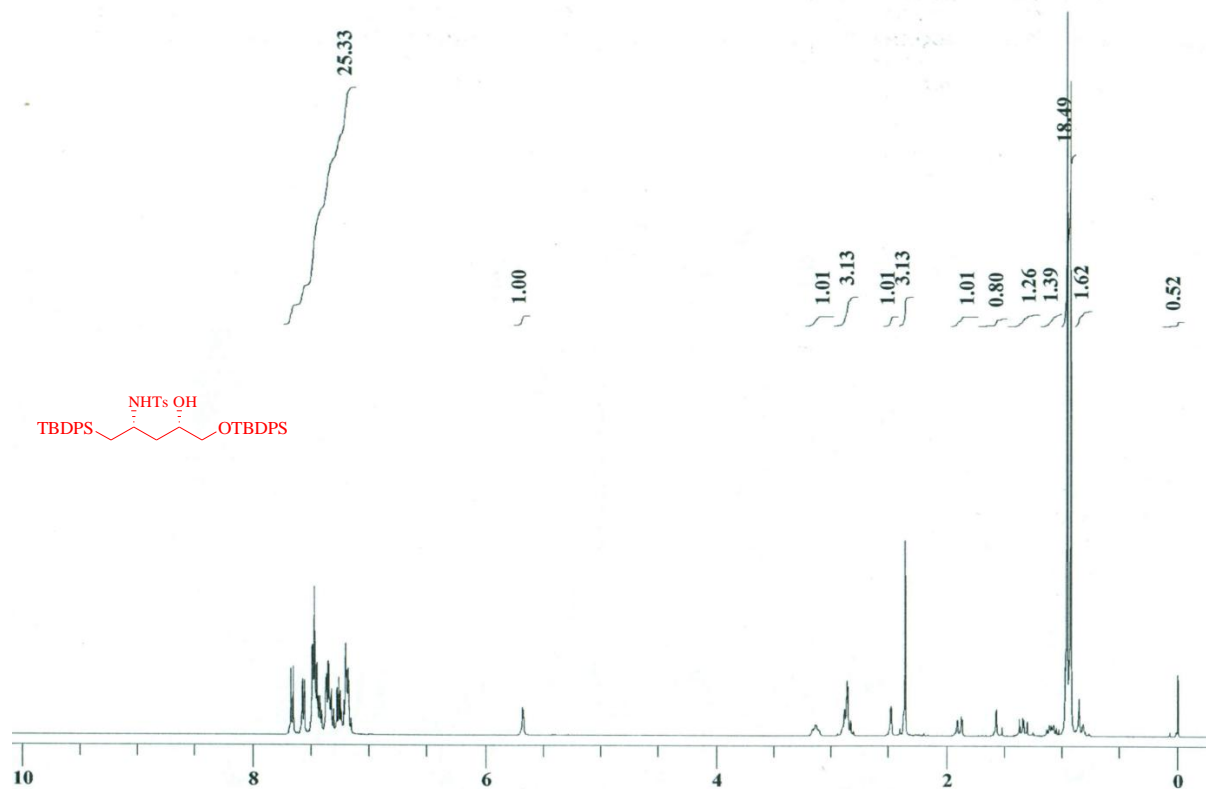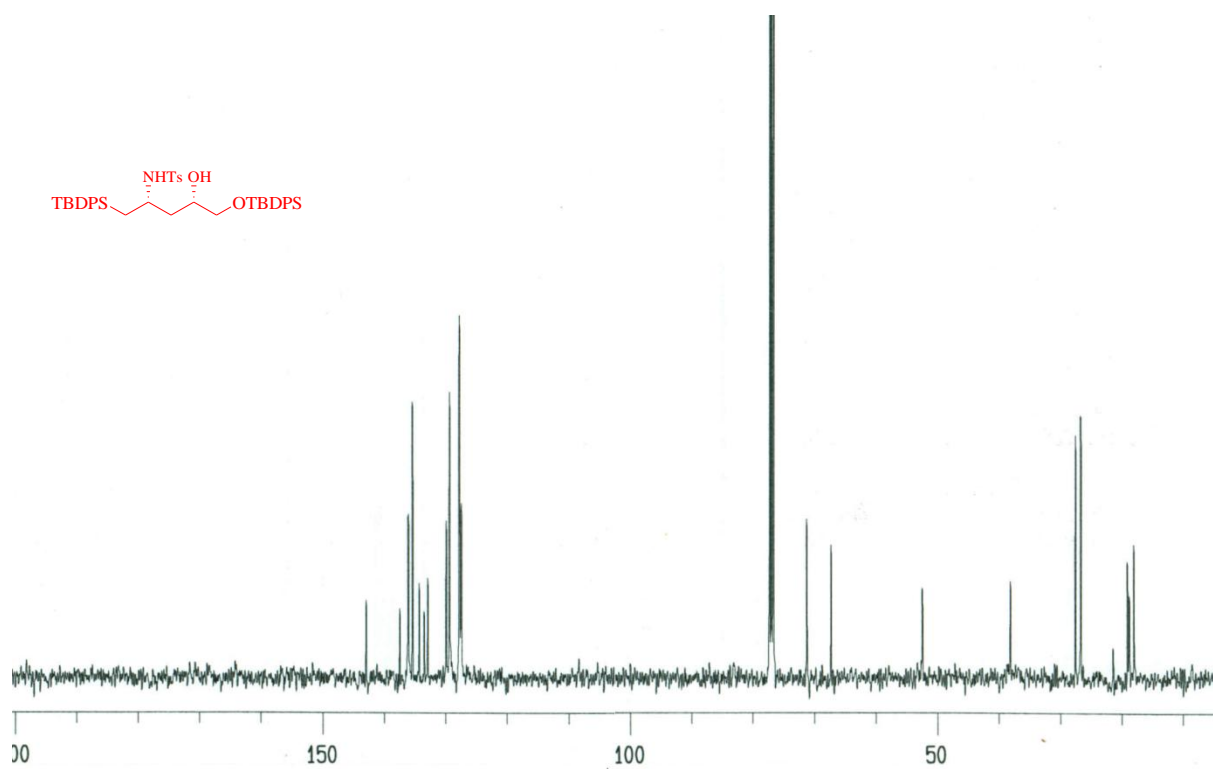

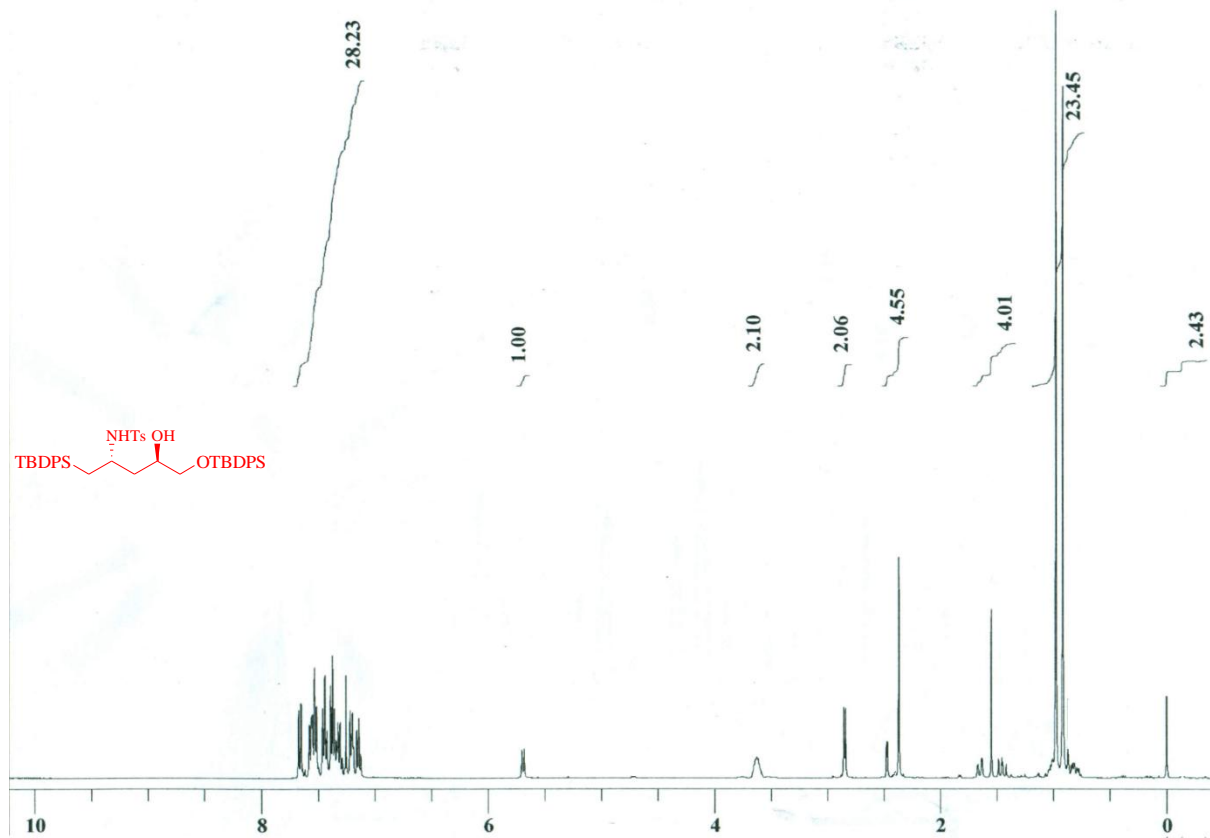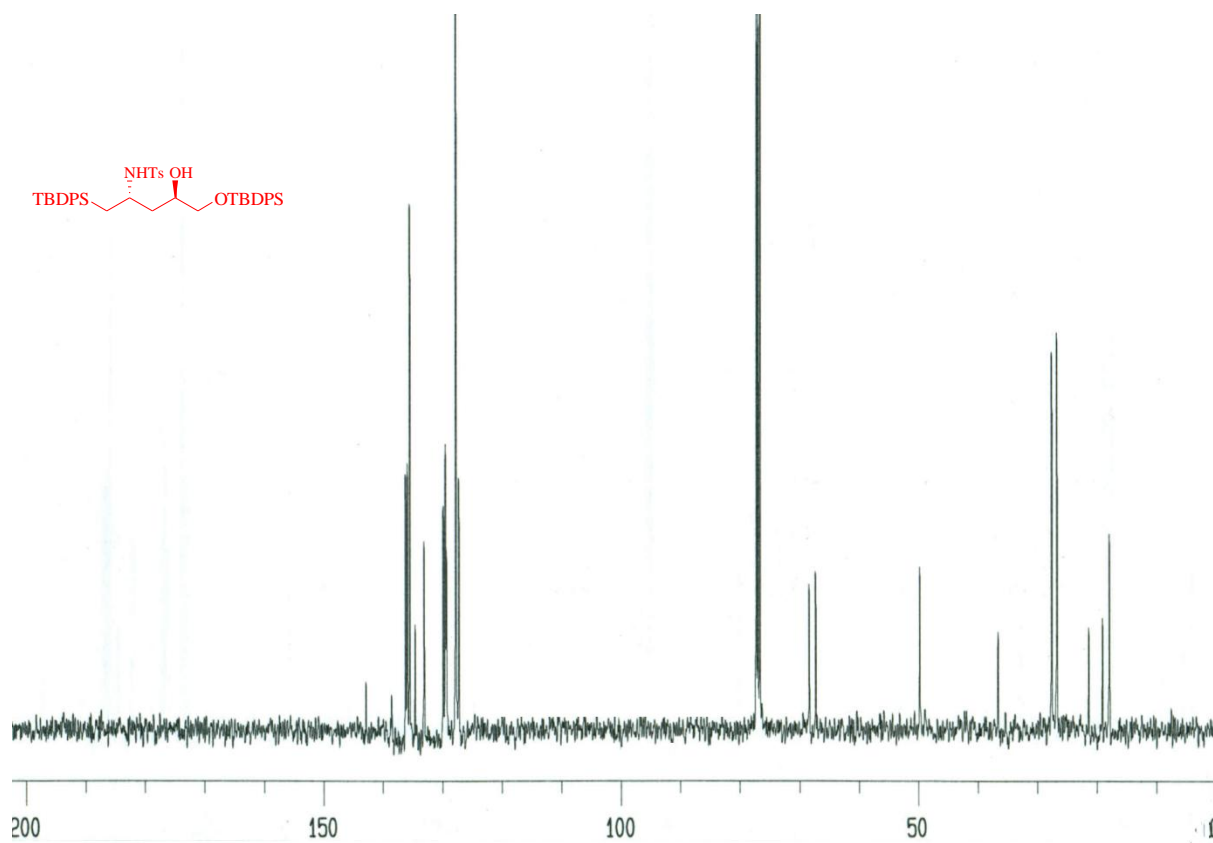

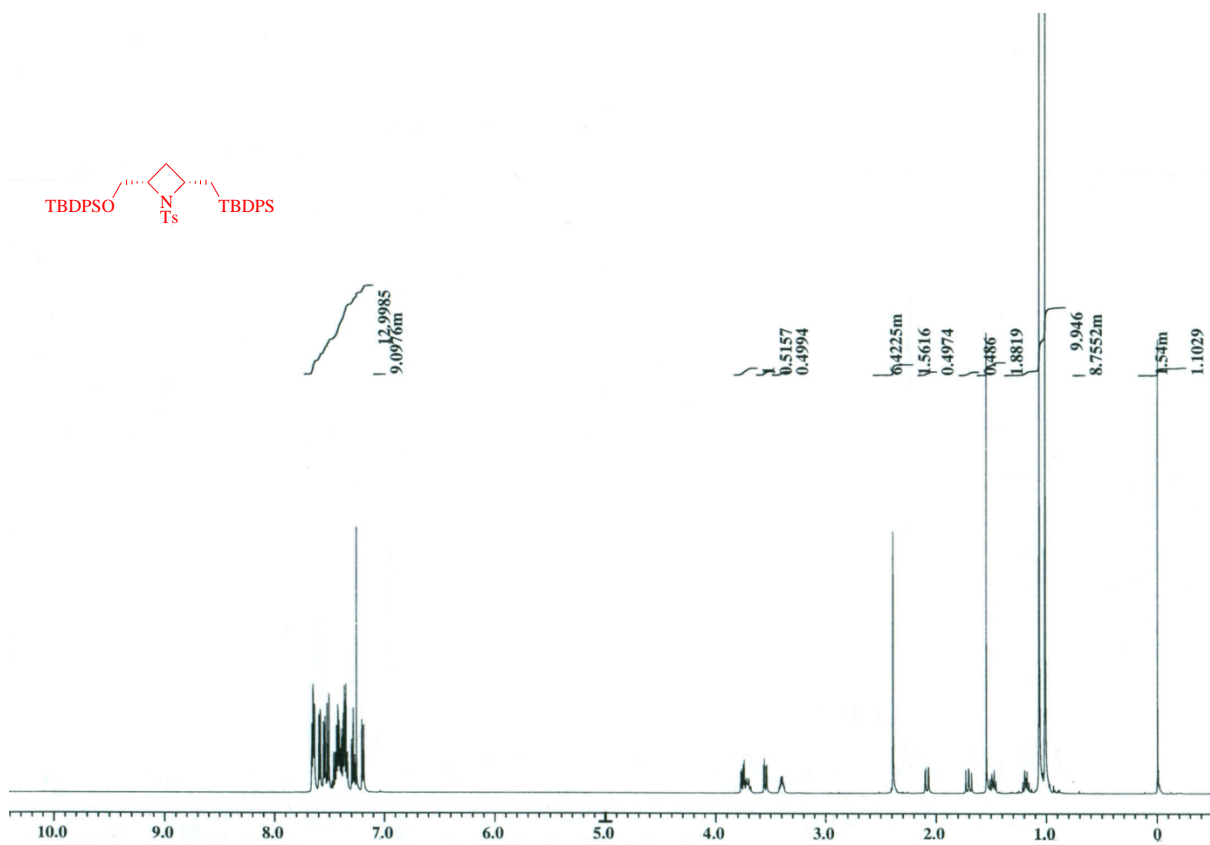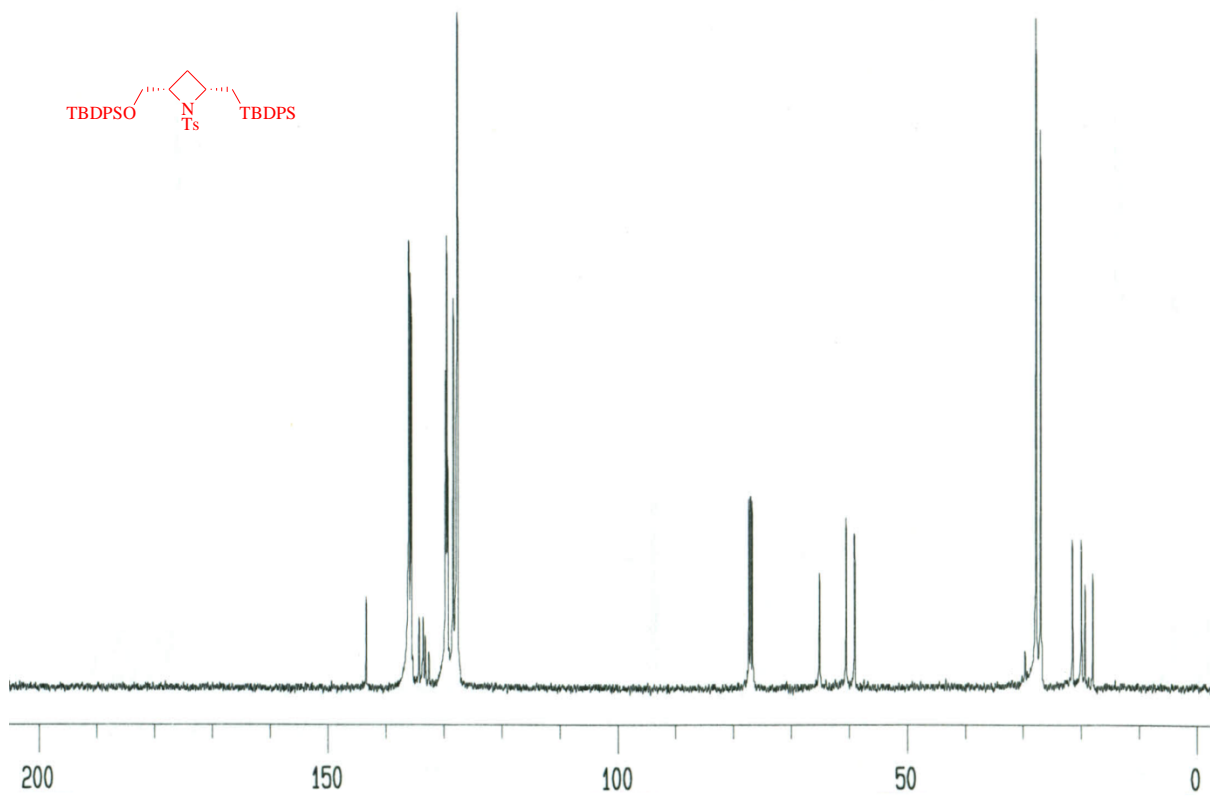



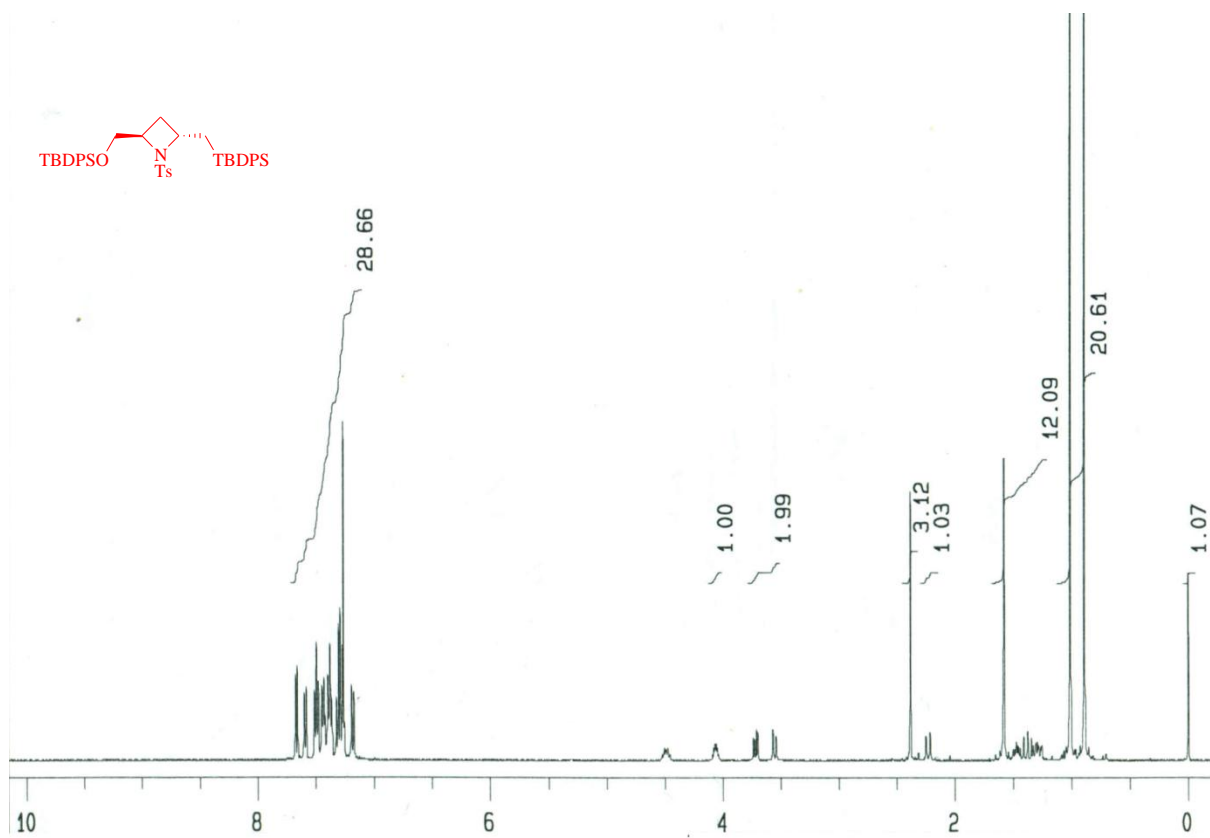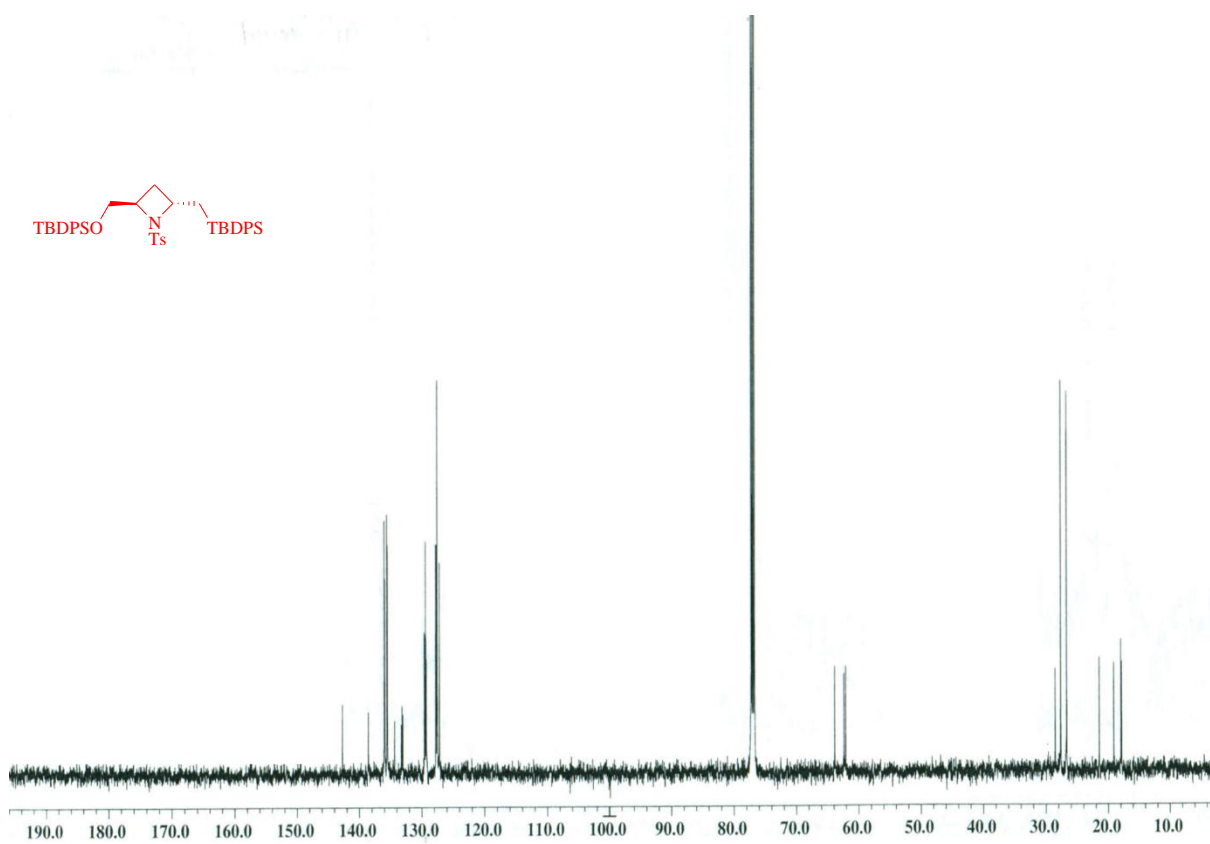

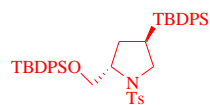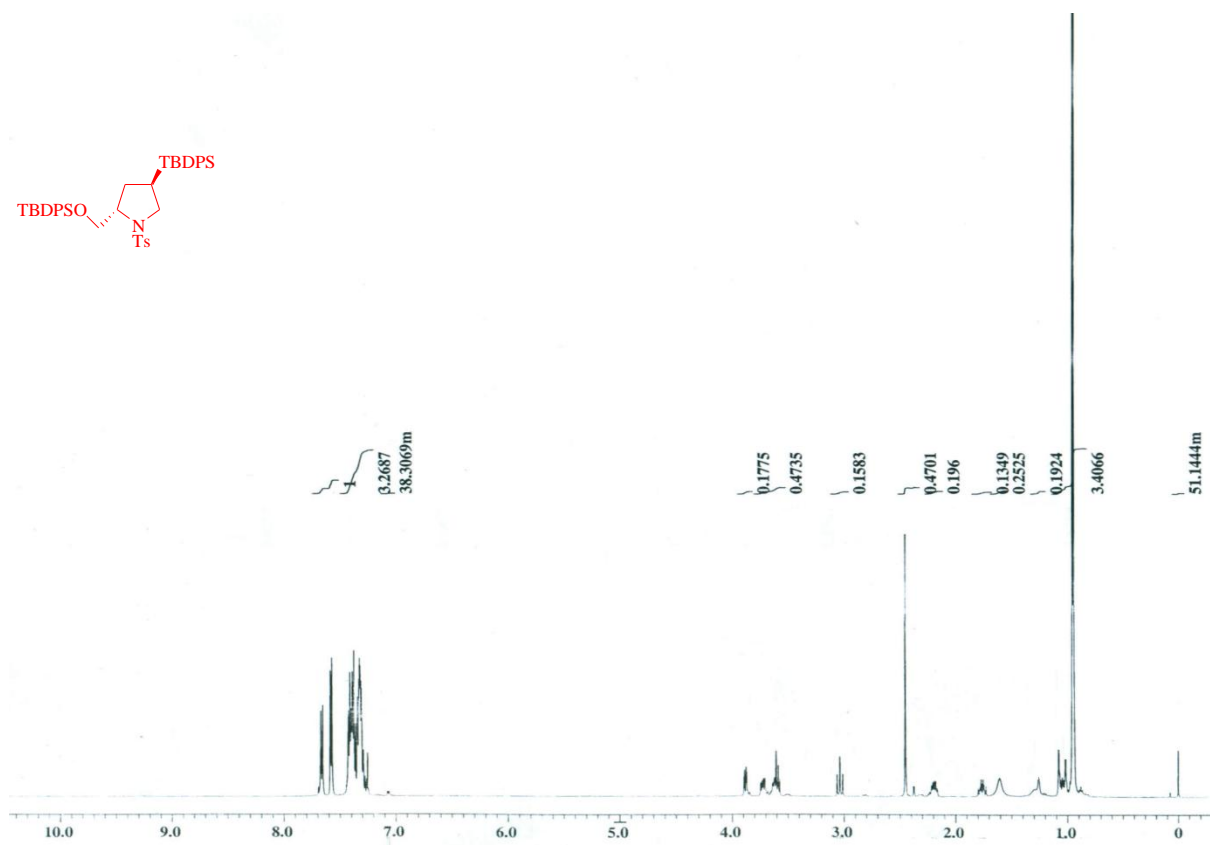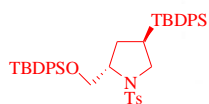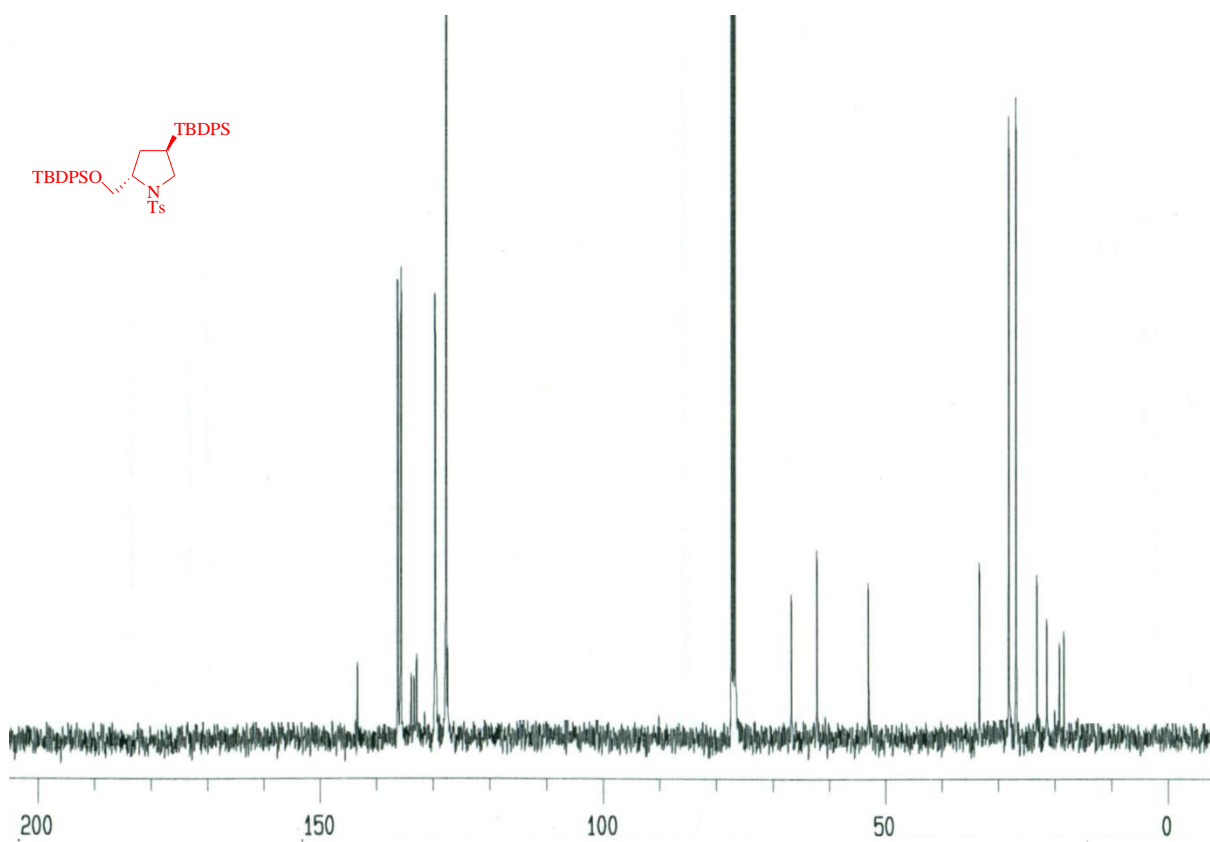

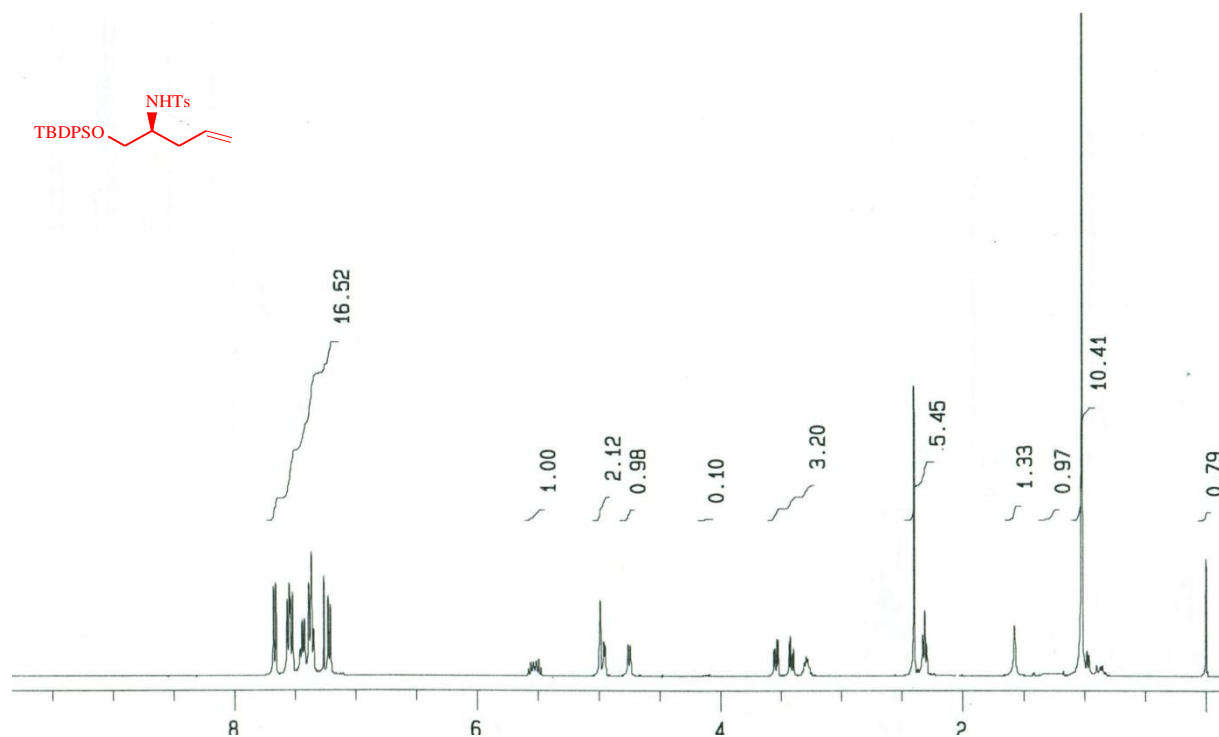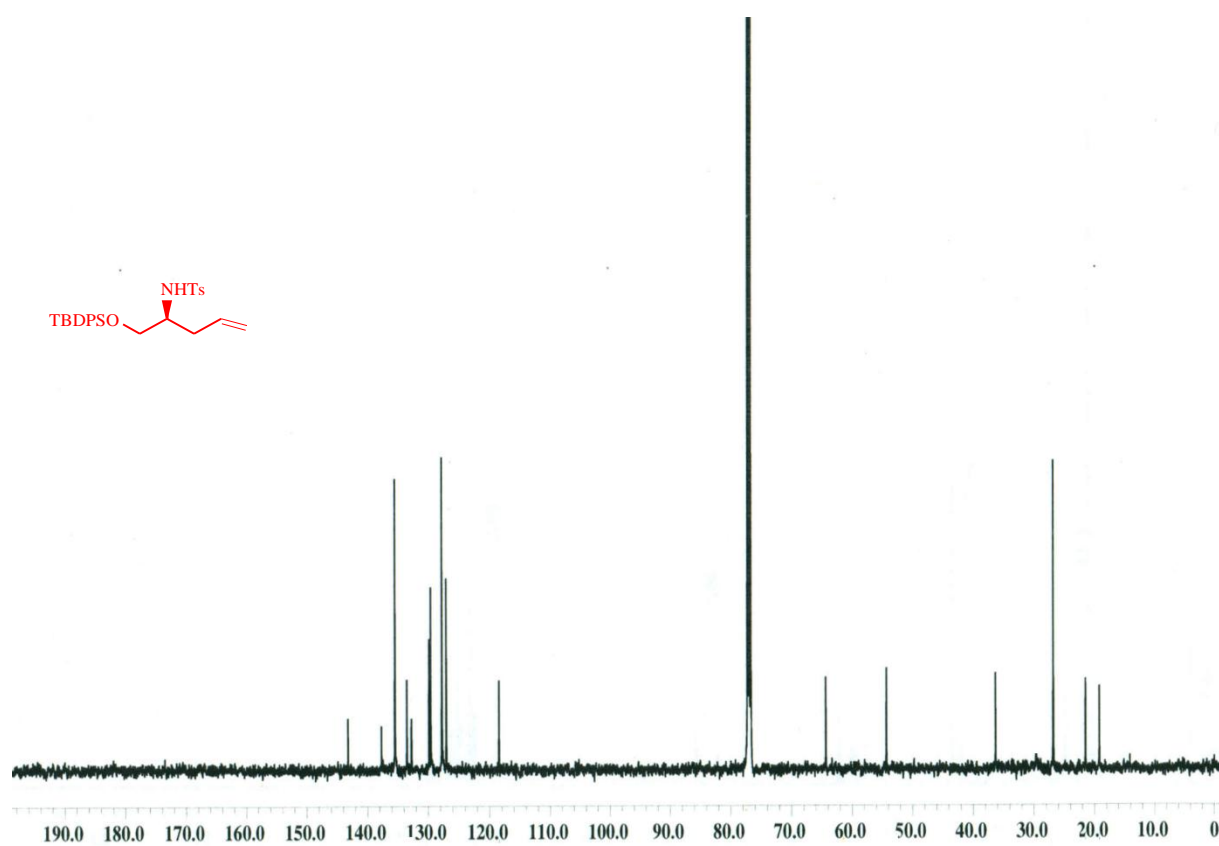

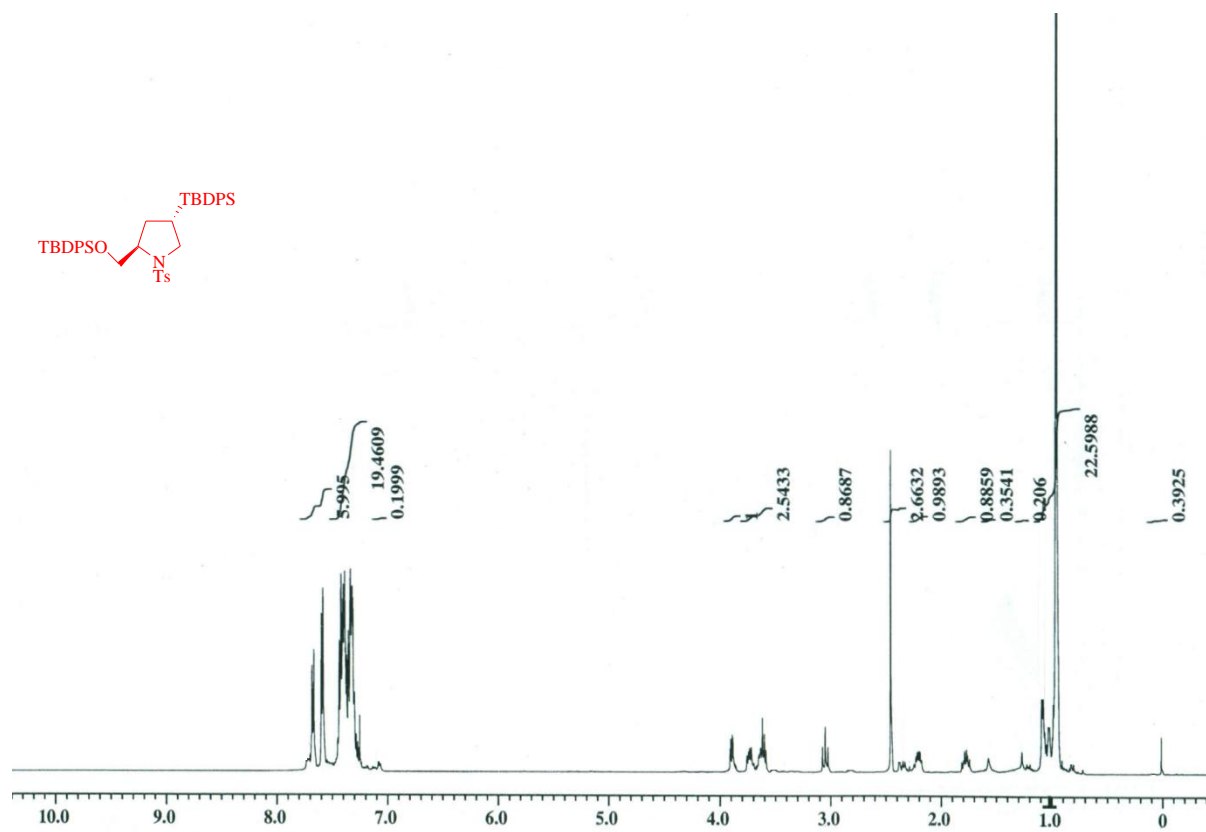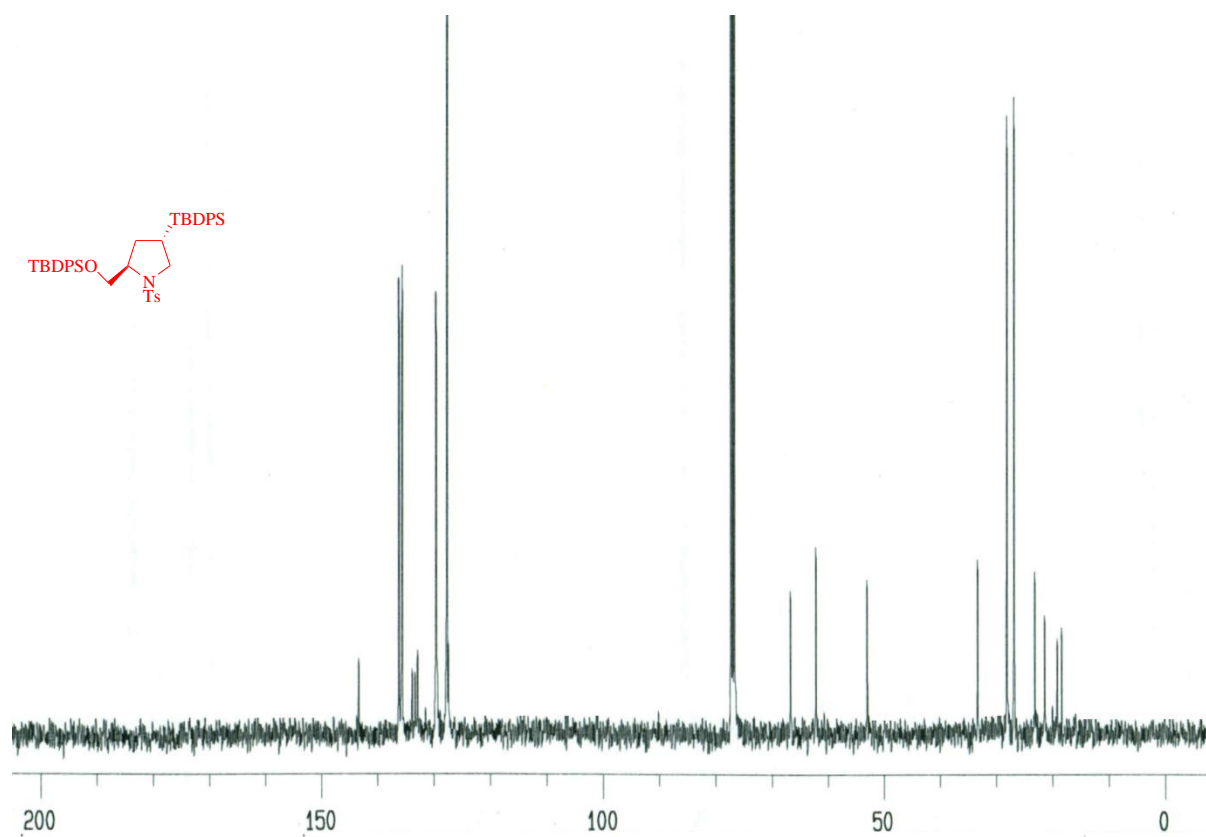

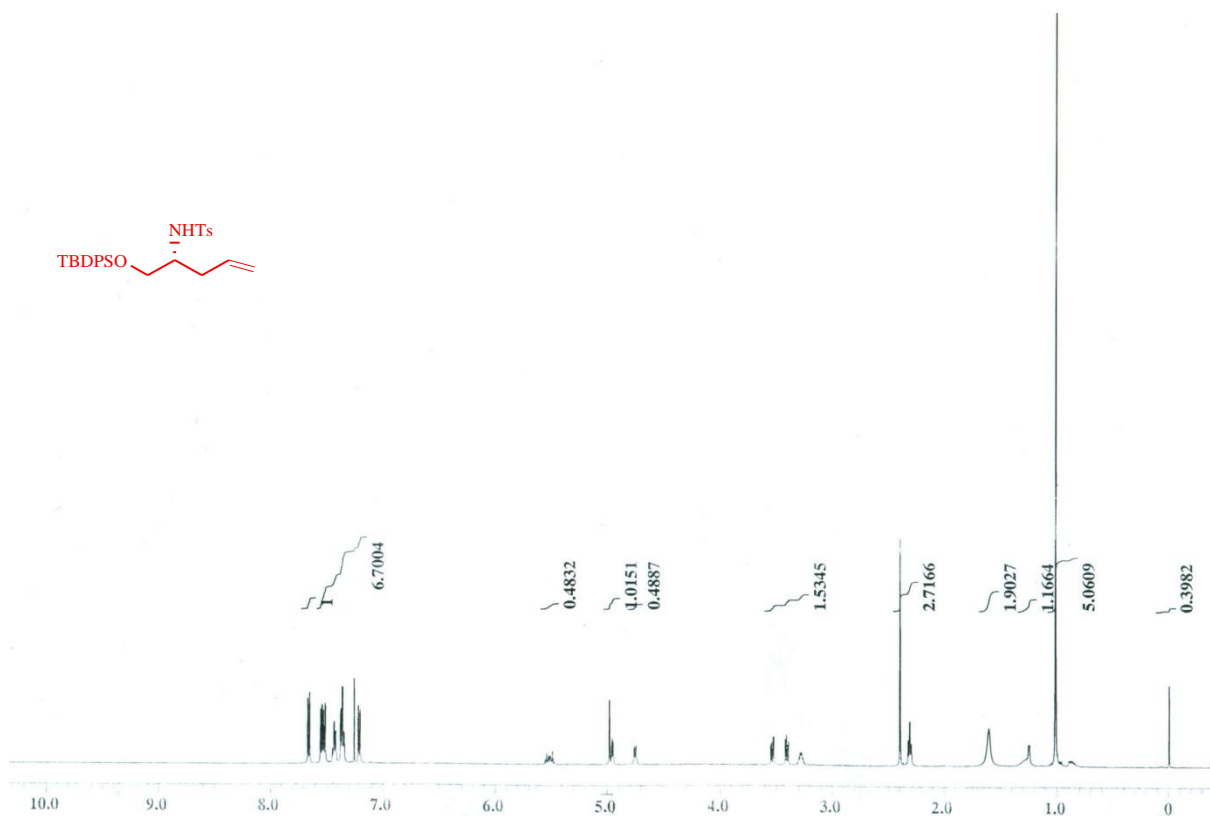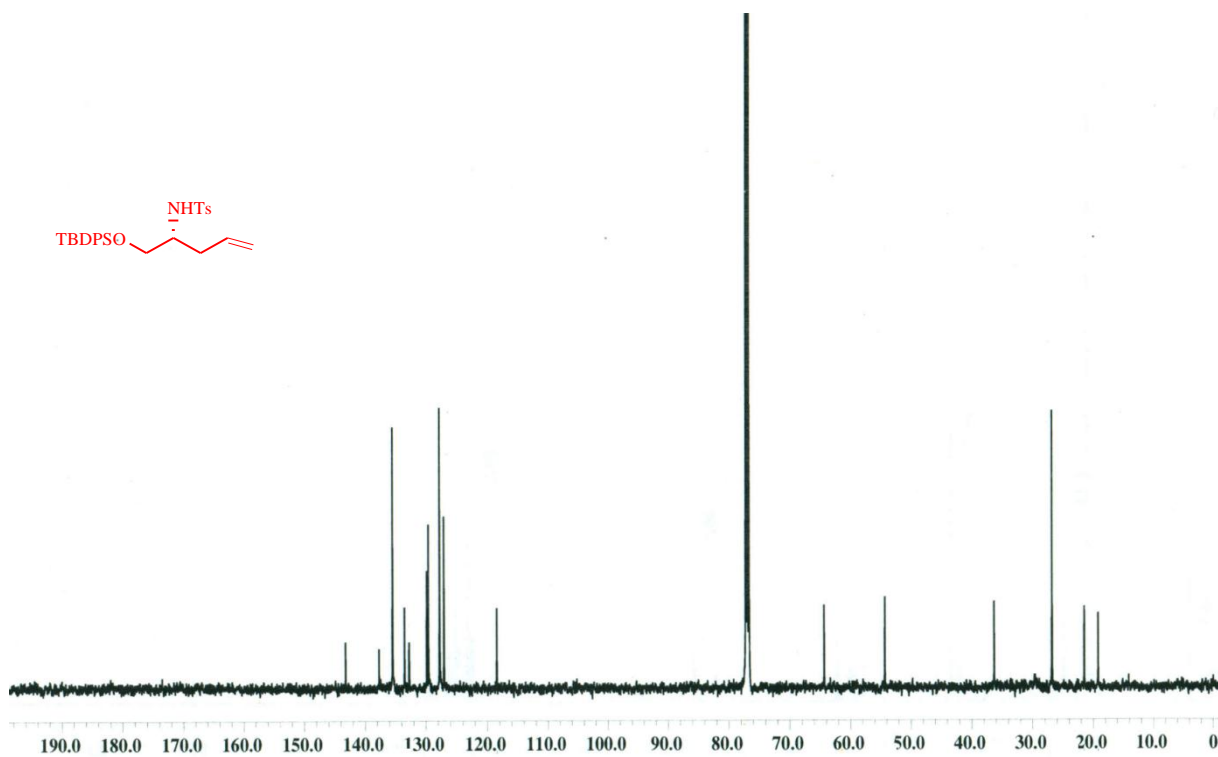

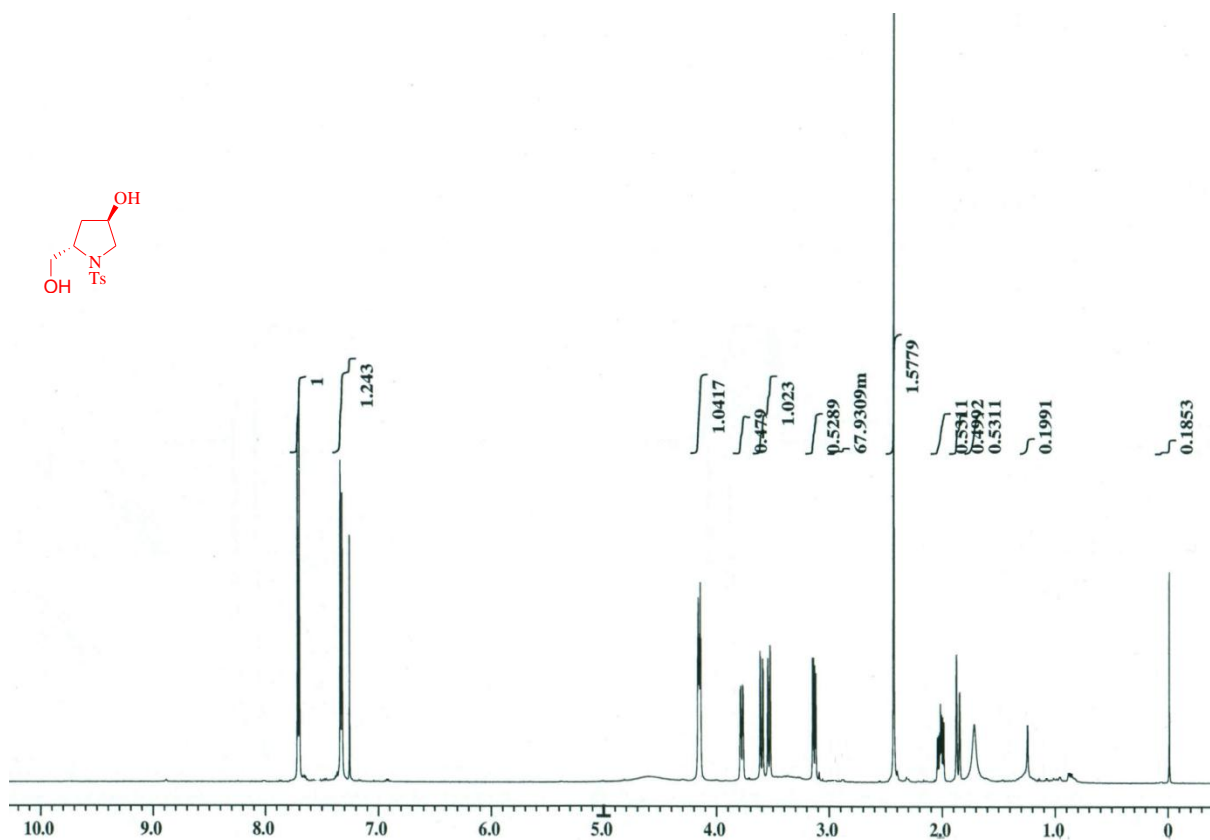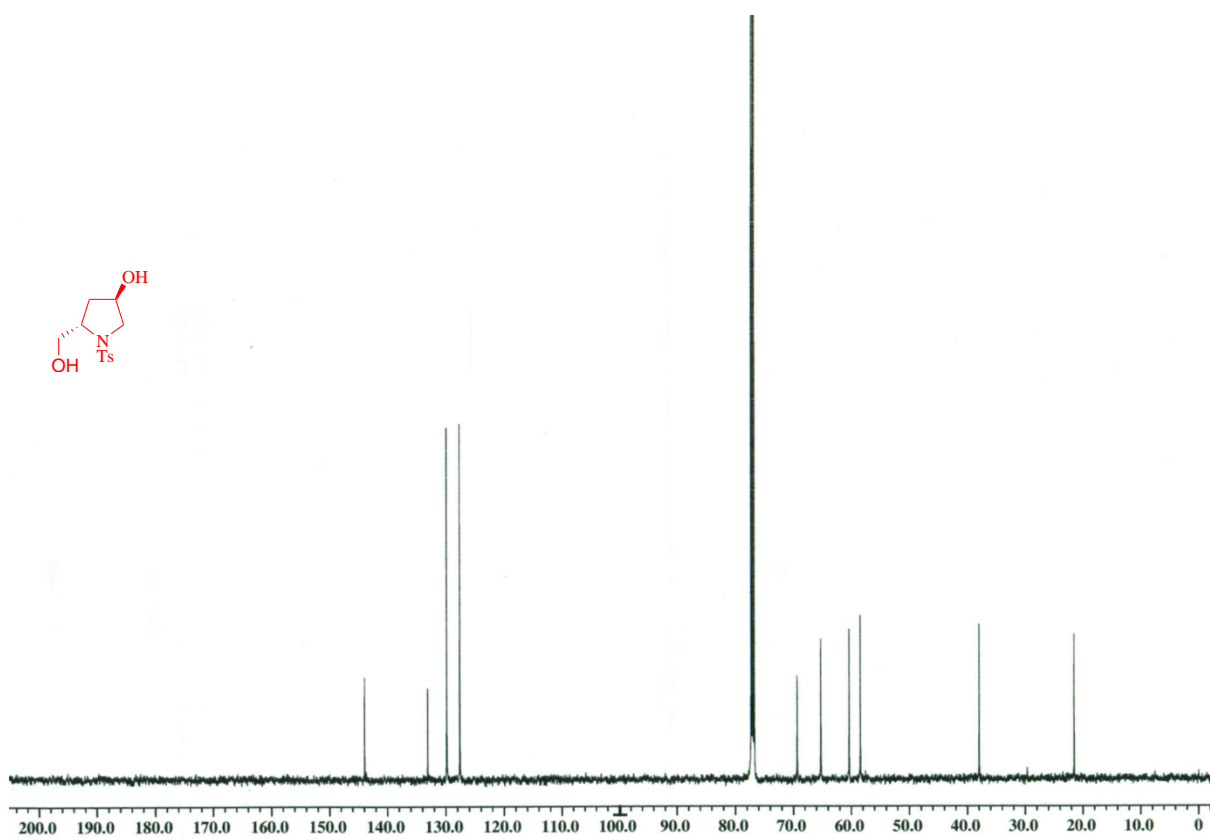

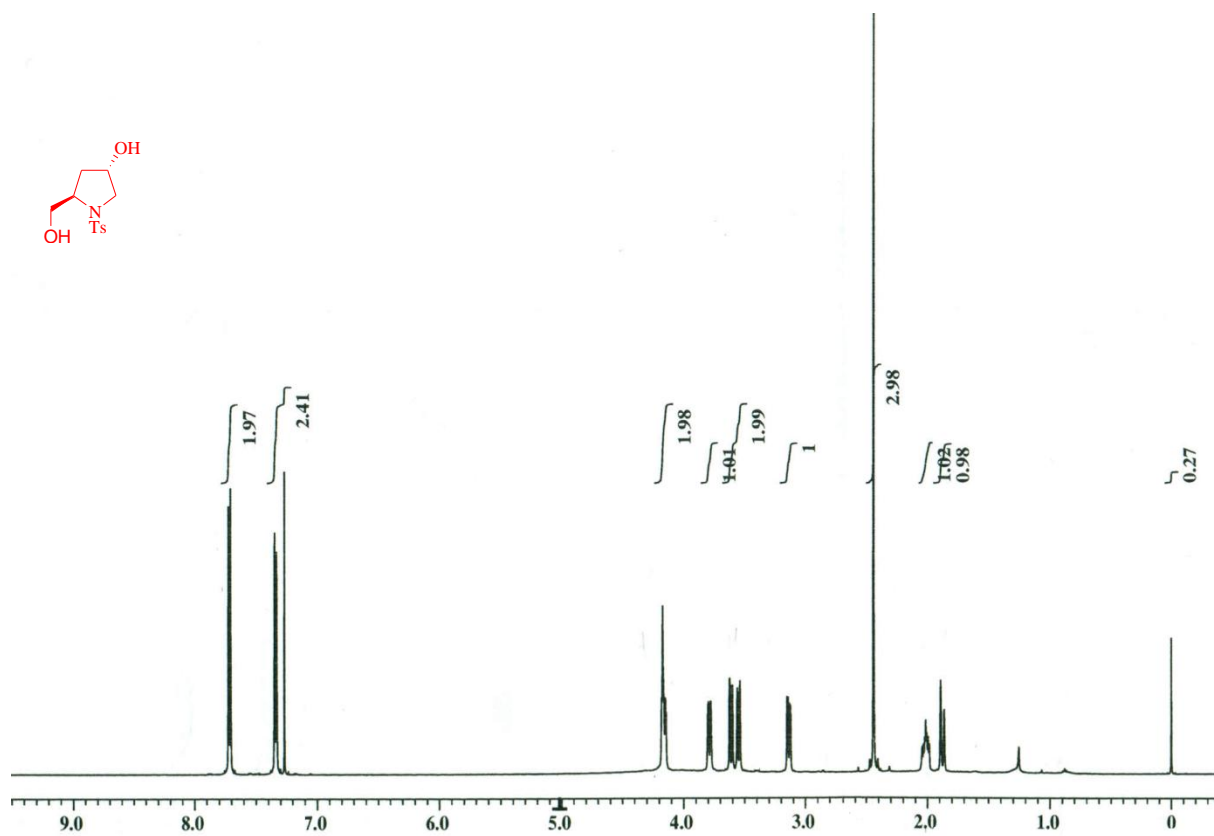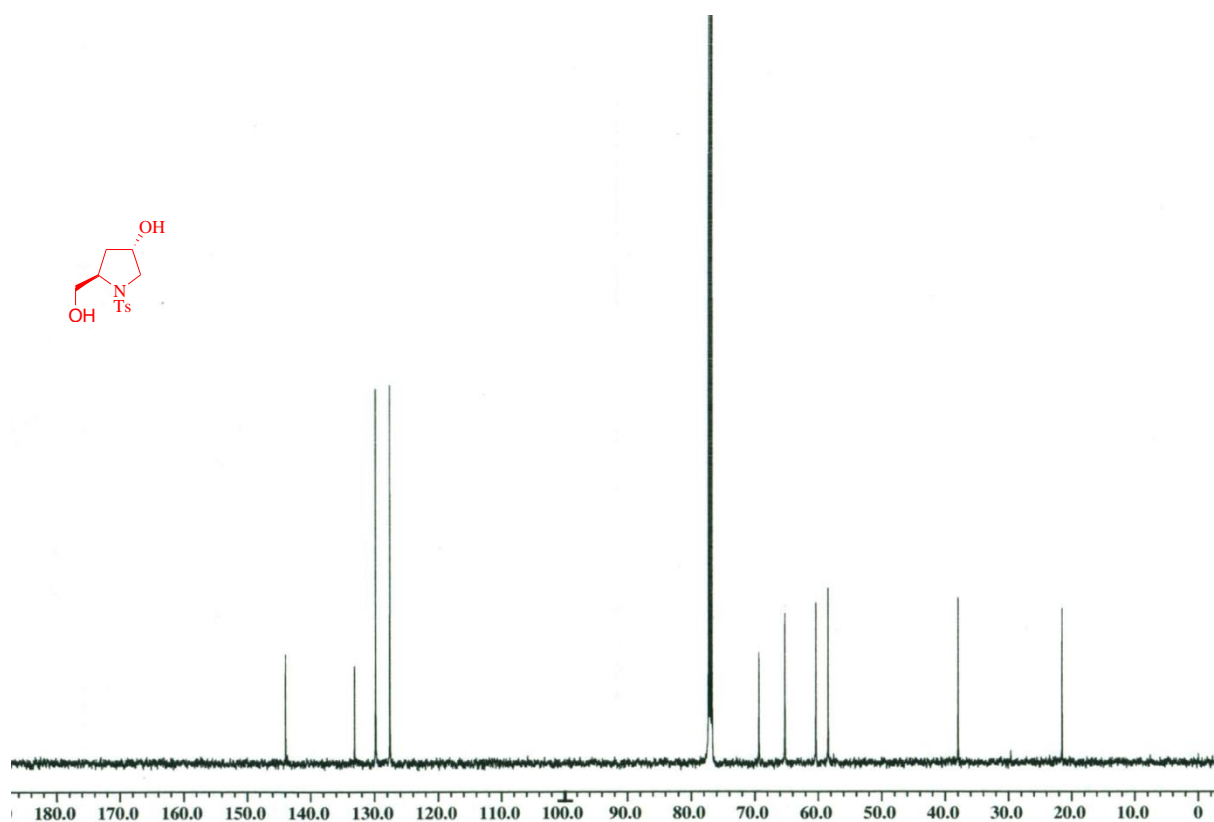

Supplement: c2ob07140a_2.pdf [file c2ob07140a_2.pdf]
